# Supplementary material for: Heterosynaptic plasticity of the visuo-auditory projection requires cholecystokinin released from entorhinal cortex afferents
Source: eLife. 2024 Mar 4;13:e83356. doi: 10.7554/eLife.83356 (PMC10954309; doi:10.7554/eLife.83356)
Supplement: Figure 1—source data 1. [file elife-83356-fig1-data1.xlsx]

## Sheet: 1C
raw data								normalized data( everydata divided by 0.014677)
power(mw)	1.8	3.7	7.5	13.5	25			power(mw)	1.8	3.7	7.5	13.5	25
	0.0059854	0.0179776	0.0231147	0.00766467	0.0129004				0.407801	1.22486	1.57486	0.522214	0.878941
	0.00335684	0.00694373	0.0150185	-0.011349	-0.00884963				0.228711	0.473095	1.02325	-0.77324	-0.602949
	-0.0101453	-0.00221393	-0.00178487	0.0210223	0.0116893				-0.691229	-0.150841	-0.121608	1.43231	0.796422
	0.00763389	0.0138528	0.00540108	-0.0119904	0.0306676				0.520117	0.943828	0.36799	-0.816939	2.08946
	0.0197675	0.0150044	0.0150998	0.0329469	0.0300955				1.34681	1.02229	1.02879	2.24476	2.05049
	-0.00037564	0.0155242	0.00211893	0.0208312	0.0156676				-0.0255934	1.05771	0.144368	1.41928	1.06748
	0.00848625	0.00312697	0.0107794	0.0236498	0.00301787				0.578191	0.213049	0.734426	1.61132	0.205615
	0.00325488	0.000945749	0.0123213	0.0179626	0.00378848				0.221763	0.0644364	0.839486	1.22384	0.258119
	0.00821619	-0.00196816	0.000204344	0.018165	0.00605621				0.559791	-0.134096	0.0139225	1.23763	0.412626
	0.0131606	0.0122559	0.027159	0.0190579	0.0230334				0.896668	0.835024	1.85041	1.29847	1.56932
	0.0113464	0.00330943	0.0184001	0.021794	0.033383				0.773061	0.22548	1.25365	1.48489	2.27447
	MEAN								MEAN
	0.00642609	0.00770533	0.0116211	0.0145232	0.0146772				0.437826	0.524985	0.791777	0.989503	1
									SD
									0.526437	0.50847	0.640363	0.968985	0.916265
									SE
									0.158727	0.153309	0.193077	0.29216	0.276264

## Sheet: 1D
										LTP curve					pair T-test
RecSite1	RecSite2	RecSite3	RecSite4	RecSite5	RecSite6	RecSite7	RecSite8	RecSite9	RecSite10	Normalized slope	Sem	Time(min)			before	after
0.984836	1.01316	1.19997	1.06328	1.01879	0.979908	1.15374	0.8661	0.89639	1.01499	1.01912	0.03407	-22.5		RecSite1	1.022	0.9941
1.00548	1.01888	1.03042	1.01862	1.08454	0.992658	1.27882	1.06583	0.85835	0.89571	1.02493	0.03779	-21		RecSite2	0.9976	0.8311
0.950437	1.00746	0.860861	0.972079	1.0624	1.00541	0.823958	0.693824	0.834531	0.834196	0.90452	0.03768	-19.5		RecSite3	0.9664	1.1132
0.895399	0.996038	0.863089	0.925543	1.04027	0.971907	0.97722	1.01998	0.905394	0.889766	0.94846	0.02022	-18		RecSite4	0.9993	0.6787
0.974873	0.97648	0.865318	0.964569	0.93026	0.972778	1.13048	1.34614	0.976256	0.945335	1.00825	0.04526	-16.5		RecSite5	0.9759	0.8198
0.861218	0.956922	0.791905	0.992364	0.88054	0.97365	0.952796	1.50739	0.997582	1.11799	1.00324	0.06601	-15		RecSite6	1.0097	0.8351
0.994257	0.910423	0.780495	1.02016	0.84512	1.05152	1.06488	1.64453	1.01891	1.16266	1.0493	0.07899	-13.5		RecSite7	0.955	1.3214
1.1273	0.943821	0.800086	0.948501	0.87673	1.06105	1.22214	1.33185	1.06661	1.01563	1.03937	0.05323	-12		RecSite8	1.1559	1.3174
1.09222	0.977219	0.819678	1.06375	0.90834	1.07057	0.968669	1.01917	1.11431	0.868609	0.99025	0.03328	-10.5		RecSite9	1.0452	0.8168
1.05714	1.09051	1.10642	1.04437	1.00698	1.04005	0.908825	1.10375	1.05333	0.947435	1.03588	0.02172	-9		RecSite10	1.0405	0.8363
1.11391	1.10211	1.2308	1.02498	1.07272	1.00953	0.848981	1.18832	0.992342	0.941241	1.05249	0.03799	-7.5
1.09863	1.06932	1.27398	1.05412	1.03939	0.982448	1.12012	1.38202	0.946638	0.979283	1.0946	0.04562	-6			1.01675	0.95639
1.08335	1.03653	1.05609	0.969766	1.00607	0.955368	0.940742	1.02913	1.00999	1.08786	1.01749	0.01703	-4.5
0.896123	0.975115	0.838202	0.937308	1.06133	0.976622	0.761361	0.676251	1.12637	1.14215	0.93908	0.05051	-3
0.896123	0.913703	0.966067	0.937308	1.06133	0.976622	0.761361	0.676251	1.12637	1.14215	0.94573	0.0492	-1.5		n	10
0	0	0	0	0	0	0	0	0	0	0	0	--		df	9
0	0	0	0	0	0	0	0	0	0	0	0	--		t	0.878
0	0	0	0	0	0	0	0	0	0	0	0	--		p	0.403
1.09875	1.02662	1.11315	0.797721	0.848136	0.833714	1.46263	1.45	0.564484	0.802493	0.99977	0.09687	1.5
1.09875	1.02662	1.11315	0.797721	0.848136	0.927118	1.46263	1.39529	0.637296	0.855431	1.01621	0.08697	3
1.00008	0.772541	1.07374	0.692294	0.746631	0.901127	1.40599	1.34059	0.710108	0.948324	0.95914	0.08438	4.5
0.901416	0.74537	1.03433	0.775304	0.810879	0.875136	1.34934	1.18878	0.638288	0.704341	0.90232	0.0752	6
1.00231	0.912129	1.15695	0.858315	0.875127	0.888021	1.59873	1.62625	0.802439	0.905451	1.06257	0.10184	7.5
0.947676	1.07889	1.19744	0.898217	0.859783	0.900906	1.20197	1.38316	0.966589	0.808175	1.02428	0.06161	9
0.893043	0.983682	1.0725	0.840246	0.84444	0.85682	1.09991	1.14008	0.583804	0.710899	0.90254	0.05865	10.5
0.972218	0.888475	1.18278	0.782275	0.737569	0.812733	1.14519	1.05813	0.877216	0.807161	0.92637	0.05217	12
0.879762	0.822056	1.29305	0.62643	0.850595	0.835324	1.19047	1.33331	0.742575	0.903424	0.9477	0.07986	13.5
1.01528	0.930474	1.21308	0.612084	0.806097	0.810435	1.4305	1.60848	0.607933	0.723993	0.97584	0.11408	15
1.15081	1.05711	1.13311	0.601598	0.761599	0.977458	1.60447	1.51592	0.682159	0.610422	1.00946	0.1188	16.5
1.14833	1.09632	1.1845	0.576061	0.655937	0.854732	1.71882	1.42336	0.756386	0.545908	0.99604	0.1289	18
1.14586	1.09183	1.23588	0.589606	0.596118	0.809597	1.53094	1.5671	0.953731	0.827898	1.03486	0.11527	19.5
1.02199	1.08733	1.19031	0.622692	0.544154	0.764461	1.34306	1.5679	0.822286	0.830763	0.97949	0.10808	21
0.898113	0.959014	1.14473	0.655778	0.555114	0.796917	1.50562	1.56869	0.690841	0.833628	0.96085	0.11534	22.5
1.04886	0.777355	1.28809	0.80162	0.597535	0.767547	1.56294	1.46404	0.715495	0.836211	0.98597	0.11268	24
1.19961	0.964282	1.32738	0.787305	0.714683	0.786189	1.62026	1.35939	0.740149	0.838793	1.0338	0.10638	25.5
1.12433	0.997899	1.41593	0.77299	0.831831	0.804832	1.58013	1.56799	0.785222	0.859228	1.07404	0.10981	27
1.14589	1.03152	1.3692	0.734387	0.758476	0.898003	1.60145	1.62629	0.830295	0.879663	1.08752	0.11214	28.5
1.08705	0.841661	1.25482	0.695783	0.685121	0.991174	1.53871	1.68459	0.626387	0.911599	1.03169	0.12098	30
1.02821	0.736611	1.14043	0.703724	0.661602	0.884455	1.47596	1.81984	0.69745	0.943535	1.00918	0.12659	31.5
0.959054	0.709672	1.02202	0.711665	0.779936	0.777736	1.5537	1.81069	0.768513	0.590516	0.96835	0.13345	33
0.889896	0.721788	0.941944	0.811102	0.89827	0.914479	1.63144	1.72934	0.892409	0.86434	1.0295	0.11644	34.5
1.17251	0.733904	0.906247	0.878706	0.966569	1.04435	1.45255	1.648	0.693637	0.639384	1.01358	0.10965	36
1.14292	0.894286	0.892737	0.905989	0.952772	1.14528	1.27365	1.40401	0.692306	0.805451	1.01094	0.0741	37.5
1.11334	1.05467	1.00747	0.913113	0.897926	1.20119	1.23271	1.16003	0.690975	0.971517	1.02429	0.05494	39
1.08936	0.926591	1.12221	0.89093	0.843081	1.2193	1.39865	1.33667	0.693966	0.971181	1.04919	0.07499	40.5
1.02882	0.798514	1.03737	0.854094	0.814237	1.07938	1.56459	1.67752	0.696958	0.970845	1.05223	0.10819	42
0.96828	0.81195	0.991237	0.817258	0.785392	0.939448	1.38847	1.57336	0.85472	0.654289	0.97844	0.09527	43.5
1.12131	0.825387	0.998802	0.712725	0.836673	0.930348	1.35455	1.4692	0.775476	0.754581	0.97791	0.08684	45
1.19265	1.07467	1.00637	0.726242	0.887954	0.921247	1.30919	1.12703	0.696232	0.854874	0.97965	0.06642	46.5
1.05564	1.09964	1.06763	0.739759	0.796414	0.908921	1.33971	1.05897	0.627307	0.67241	0.93664	0.07536	48
0.918637	0.99544	1.16456	0.776636	0.704874	0.896595	1.31583	1.12797	0.639452	0.718652	0.92586	0.07468	49.5
1.05753	0.891239	1.18976	0.72645	0.774741	0.83878	1.29196	1.19696	0.651597	0.764894	0.93839	0.0758	51
1.19641	0.740206	1.21496	0.656848	0.702076	0.782023	1.21693	1.42413	0.950136	0.864324	0.9748	0.08943	52.5
1.11795	0.67664	1.04202	0.599378	0.794128	0.845073	1.22011	1.6513	0.980644	0.963755	0.9891	0.10063	54
0.884199	0.657804	1.03967	0.583932	0.88618	0.772139	1.22329	1.57059	0.877136	1.02441	0.95194	0.09546	55.5
0.806653	0.680993	1.03731	0.589497	0.898098	0.771694	1.61754	1.48988	0.773628	1.03593	0.97012	0.11312	57
0.823478	0.725194	1.1978	0.659137	0.910017	0.77125	1.38746	1.15453	0.957503	0.795852	0.93822	0.0787	58.5
0.887489	0.769396	1.17155	0.728776	0.84388	0.843295	1.29161	1.37229	1.014	0.668369	0.95907	0.08126	60

## Sheet: 1E
PSTH
Time (ms)	Spike#
1	0
2	0
3	0
4	0
5	1
6	0
7	0
8	0
9	0
10	0
11	0
12	2
13	15
14	47
15	34
16	19
17	29
18	25
19	6
20	3
21	2
22	3
23	2
24	4
25	4
26	5
27	3
28	9
29	6
30	6
31	10
32	7
33	8
34	12
35	6
36	9
37	6
38	11
39	10
40	7
41	9
42	7
43	12
44	9
45	5
46	2
47	6
48	5
49	7
50	5

## Sheet: 1F
Time(ms)	90dB	80dB	70dB	60dB	50dB	40dB
10	0	1	1	0	2	0
20	1	0	3	2	0	1
30	1	0	4	1	1	1
40	1	0	5	3	1	1
50	0	2	0	0	3	1
60	2	1	2	0	1	0
70	1	0	2	3	3	0
80	1	0	0	0	1	0
90	1	1	1	2	0	0
100	3	1	2	1	0	2
110	0	0	1	3	4	0
120	1	0	0	4	3	2
130	1	0	1	2	1	1
140	1	3	1	4	2	1
150	3	0	0	2	1	2
160	2	0	1	3	0	1
170	4	0	3	0	0	0
180	1	0	1	4	1	0
190	1	1	1	1	2	0
200	3	1	0	3	0	2
210	1	2	2	2	2	8
220	1	1	3	3	1	5
230	1	2	3	2	3	3
240	2	4	4	0	0	3
250	0	2	0	0	2	2
260	3	4	0	1	5	3
270	1	7	3	2	1	3
280	5	5	3	1	0	3
290	8	4	4	2	2	2
300	1	5	2	4	0	2
310	2	4	1	0	2	2
320	7	7	4	6	1	1
330	2	8	1	1	1	2
340	1	1	1	1	1	0
350	0	2	6	1	0	3
360	1	3	4	0	2	2
370	0	2	2	1	0	0
380	3	2	2	2	1	1
390	3	4	0	3	1	0
400	0	2	1	3	0	0
410	3	2	0	1	1	0
420	3	4	0	1	1	1
430	1	2	4	0	0	1
440	0	1	1	3	1	0
450	2	1	1	1	0	2
460	0	2	0	3	0	1
470	2	1	0	4	1	2
480	0	1	2	1	0	0
490	1	1	0	2	1	1
500	2	2	0	1	3	0
510	0	2	1	0	1	0
520	24	27	20	9	4	2
530	2	8	3	2	3	2
540	8	5	3	0	0	1
550	6	7	6	0	3	2
560	4	7	5	0	4	1
570	6	11	4	3	2	0
580	5	11	4	1	1	0
590	5	6	7	2	2	0
600	0	7	3	3	2	1
610	4	3	6	2	3	0
620	4	5	0	2	4	0
630	1	5	6	2	0	0
640	1	4	3	7	0	0
650	3	2	3	6	0	0
660	1	3	1	6	3	0
670	3	2	2	2	2	0
680	2	5	4	4	0	3
690	6	3	4	3	0	1
700	5	4	2	1	2	3
710	3	5	1	3	4	3
720	3	5	1	3	1	1
730	1	1	5	2	2	1
740	5	0	2	5	2	4
750	3	1	4	8	3	1
760	7	3	2	11	1	2
770	2	8	1	2	3	2
780	4	1	3	5	1	2
790	3	2	4	2	1	0
800	3	1	2	1	1	2
810	0	3	4	1	3	0
820	1	2	1	2	3	2
830	2	1	0	2	0	0
840	1	3	1	2	1	1
850	0	0	1	2	0	0
860	0	1	3	5	1	1
870	1	1	2	4	0	4
880	1	1	1	1	1	1
890	3	3	1	2	2	1
900	1	0	2	0	0	2
910	1	0	3	0	0	2
920	2	0	1	0	0	1
930	2	1	0	0	0	0
940	3	1	0	1	1	2
950	1	0	0	0	0	1
960	1	0	0	0	0	1
970	1	3	0	0	1	0
980	2	0	0	0	3	0
990	2	0	0	0	1	0
1000	0	2	1	0	0	0
1010	0	0	0	0	0	0
1020	3	0	1	0	0	0
1030	1	1	0	0	0	0
1040	0	2	0	0	0	1
1050	0	0	2	0	2	0
1060	0	1	0	0	1	0
1070	0	0	0	1	1	0
1080	1	1	1	1	0	1
1090	0	0	0	1	0	2
1100	0	0	0	1	1	0
1110	3	0	4	1	1	0
1120	0	0	1	0	0	0
1130	1	0	0	0	3	0
1140	1	1	1	0	2	0
1150	0	0	1	0	1	1
1160	0	1	1	0	0	0
1170	0	0	0	0	0	0
1180	0	0	0	0	0	2
1190	0	0	0	0	0	1
1200	0	0	0	0	0	2
1210	0	0	0	1	1	1
1220	0	0	0	4	1	0
1230	1	0	0	3	1	1
1240	0	0	0	2	3	1
1250	0	0	0	0	0	0
1260	1	0	0	3	0	1
1270	0	0	0	1	0	3
1280	0	1	0	0	0	3
1290	1	0	0	2	0	1
1300	1	2	0	2	4	0
1310	1	0	1	0	1	0
1320	1	2	0	2	2	2
1330	0	2	0	0	3	0
1340	0	0	2	0	2	1
1350	0	0	1	0	2	0
1360	0	1	0	0	0	0
1370	0	3	3	1	2	0
1380	0	1	3	0	3	3
1390	0	0	0	0	1	0
1400	0	0	2	0	0	1
1410	0	0	3	0	1	0
1420	0	0	0	0	1	0
1430	1	0	2	0	1	0
1440	1	0	0	0	1	2
1450	0	0	3	0	0	0
1460	0	0	2	0	2	3
1470	0	0	2	0	1	1
1480	0	0	2	0	1	0
1490	0	0	0	1	1	2
1500	3	0	2	0	2	1
1510	2	0	0	0	5	0
1520	1	0	1	0	3	1
1530	0	1	0	0	2	1
1540	0	0	2	0	0	1
1550	3	1	2	0	1	1
1560	2	0	3	0	1	4
1570	2	1	3	0	1	3
1580	0	0	3	0	3	1
1590	0	2	4	1	2	1
1600	1	0	2	0	0	3
1610	1	1	3	2	0	3
1620	0	1	1	0	0	3
1630	1	0	2	1	2	4
1640	2	0	2	3	0	2
1650	1	0	1	0	0	3
1660	1	1	4	0	3	3
1670	1	2	1	3	1	2
1680	3	1	2	1	0	0
1690	2	1	5	0	0	0
1700	0	0	1	0	0	4
1710	2	1	0	1	0	1
1720	1	0	2	0	0	1
1730	2	0	2	2	1	0
1740	0	1	0	1	5	2
1750	3	1	0	0	0	3
1760	0	0	3	1	1	1
1770	2	2	1	0	1	0
1780	5	1	5	2	0	0
1790	4	0	3	1	0	0
1800	1	3	1	1	0	3
1810	1	1	0	1	0	1
1820	1	0	1	2	0	1
1830	2	4	1	4	0	1
1840	0	1	2	1	0	0
1850	0	1	1	2	0	1
1860	1	5	2	0	0	0
1870	3	4	1	4	0	2
1880	1	4	2	1	1	0
1890	3	2	0	4	1	1
1900	2	7	0	1	1	3
1910	0	2	1	2	1	1
1920	0	3	0	2	1	0
1930	1	1	0	0	0	2
1940	0	3	1	2	2	1
1950	2	4	0	1	1	1
1960	3	1	1	1	0	2
1970	4	1	0	1	0	2
1980	4	1	2	0	2	1
1990	2	0	1	2	2	2
2000	2	2	0	1	1	1

## Sheet: 1G_and_1S1E
	CCK																	ACSF																					CCK				ACSF				two-way RM Anova
Time (min)	RecSite1	RecSite2	RecSite3	RecSite4	RecSite5	RecSite6	RecSite7	RecSite8	RecSite9	RecSite10	RecSite11	RecSite12	RecSite13	RecSite14	mean	sem																	mean	sem					before	after			before	after
-22.5	1.04584	1.00905	0.910888	0.852264	1.1132	1.02219	0.914882	0.932026	1.01996	1.01857	0.925714	1.01076	0.998592	1.01171	0.98469	0.0189		0.995209	1.00724	0.977434	1.057	1.07623	0.972048	1.01122	0.93537	0.943275	0.976817	1.00586	1.02275	1.03204	1.03835	1.014	1.00432	0.01046				RecSite1	1.0701	1.6548		RecSite1	0.967612	0.945613			df-time*manipulation	1
-21	1.06715	0.979235	0.849802	0.865974	1.00429	1.01023	1.08481	0.943646	1.01789	0.975396	0.903198	1.00893	0.954936	1.01246	0.977	0.01902		0.973899	1.03163	0.967398	1.03498	1.06685	1.13114	1.01898	0.869157	0.924278	1.00226	1.03191	1.00785	1.03745	1.00298	0.958562	1.00395	0.01642				RecSite2	1.0004	1.035		RecSite2	0.965213	0.91491			df-error	27
-19.5	0.979047	0.964122	0.836499	0.884143	1.02978	0.998269	1.00694	0.97092	1.01582	0.956497	0.89973	0.991324	0.951488	0.98285	0.96196	0.01506		1.03891	1.01798	0.999578	1.01295	0.959082	1.00598	1.03859	0.89983	0.905282	0.95884	1.0455	0.992946	1.02995	0.967622	1.07631	0.99662	0.01348				RecSite3	1.0597	1.4756		RecSite3	0.987765	1.01001			F-time*manipulation	25.125
-18	1.07854	1.00677	0.942651	0.902313	1.05527	1.03514	0.92908	1.0603	1.02333	0.950921	0.905787	1.00869	0.948041	0.953237	0.98572	0.01649		0.996919	1.00433	1.03176	0.981997	0.960813	0.880817	1.05821	0.930503	0.930196	1.04131	1.02516	1.08171	1.02245	0.975857	0.985686	0.99385	0.01427				RecSite4	1.0398	1.4633		RecSite4	1.00186	0.814889			p	p<0.0001
-16.5	1.12528	1.02835	1.0488	0.999002	0.824544	1.03838	1.03921	1.03925	1.03085	0.978652	0.974159	1.00808	0.973174	1.03282	1.01004	0.01832		0.95493	0.943501	0.970654	0.971829	0.962544	0.901267	1.02379	1.05806	0.95511	1.03203	1.00483	1.11915	1.00435	1.0087	0.939988	0.99005	0.01454				RecSite5	1.0142	1.5195		RecSite5	0.966968	0.890278
-15	1.04014	1.03939	1.09948	1.09569	0.902167	1.03261	0.921991	1.0182	0.979116	1.00638	1.04253	1.00747	1.03066	1.03367	1.01782	0.01524		1.03067	1.02043	0.959205	0.96166	0.995916	0.969415	0.989369	0.933669	1.08107	1.02276	1.03058	1.05846	0.9703	0.991501	0.985407	1.00003	0.01073				RecSite6	1.0051	1.002		RecSite6	1.07258	0.859254			Bonferroni comparison
-13.5	0.955002	1.01885	1.15016	0.963854	0.979791	1.02683	0.904644	0.939044	0.950415	1.0377	1.05647	1.00376	1.02669	1.03453	1.00341	0.01703		0.997172	0.935648	0.958373	1.02091	1.02929	0.939911	0.98243	1.02102	1.04038	1.00166	0.993146	0.99778	0.948318	0.974305	1.03083	0.99141	0.00915				RecSite7	0.974	1.2501		RecSite7	1.00302	1.17955			CCK before vs after	p<0.0001
-12	1.02467	0.998316	1.10769	0.979545	1.18134	1.01203	0.992438	0.983315	0.942633	1.03919	1.0704	1.00006	1.02271	0.982827	1.02408	0.01693		0.985339	0.952362	0.957542	1.02203	1.03656	0.910408	0.975491	1.10838	0.999685	0.980571	0.978339	0.961862	0.983806	0.986367	1.02884	0.99117	0.01214				RecSite8	1.0139	1.2516		RecSite8	1.02845	1.11117			ACSF before vs after	p=0.411
-10.5	0.926926	0.994565	0.909828	0.995236	1.12815	1.01567	1.08023	1.02759	0.945309	1.04068	1.035	1.00419	1.00286	0.91811	1.00174	0.01719		0.973506	0.969076	1.0098	1.02316	1.04383	0.972306	1.02067	0.99601	1.09089	0.989955	0.963532	0.925944	1.0193	0.998429	1.02685	1.00155	0.01051				RecSite9	0.9878	1.1849		RecSite9	1.05672	0.939757			CCK before vs ACSF before	p=0.231
-9	1.08089	0.990813	0.961821	1.07947	1.07496	1.01931	0.991027	0.953642	0.947986	1.01235	0.959945	1.00833	0.969189	0.920184	0.99785	0.01427		1.01512	0.955875	0.99357	1.00227	0.937374	1.07679	1.06585	0.98121	1.15423	0.999339	1.02368	1.01292	0.982865	0.975482	1.00491	1.0121	0.01428				RecSite10	1.025	1.2231		RecSite10	1.01172	0.846685			CCK after vs ACSF after	p<0.0001
-7.5	1.12866	0.983687	1.01381	1.07672	0.859236	0.974188	0.901822	1.02235	0.984446	0.967273	0.973208	0.995055	0.94892	0.922257	0.98226	0.01881		0.953625	0.942675	0.977342	1.02277	0.898859	1.14412	1.04627	0.96641	1.02949	0.968768	1.02552	1.01586	0.961508	0.969854	0.982968	0.99374	0.01525				RecSite11	1.0298	1.4747		RecSite11	0.993224	0.88929
-6	1.14119	0.977693	1.08005	1.07398	0.959384	0.942654	0.924453	1.04443	1.02091	1.01167	0.98647	0.987526	0.937523	0.991121	1.00565	0.01709		0.946504	0.94686	0.950108	0.956767	0.903922	1.16958	1.06978	0.885001	0.904753	1.00043	1.02736	1.0188	0.9717	0.964226	0.98005	0.97972	0.01925				RecSite12	0.9949	1.0981		RecSite12	0.977615	0.782897				mean	std
-4.5	1.1361	0.971698	1.14628	0.984247	1.10334	0.982523	0.974469	1.06651	1.03205	1.03163	1.03803	0.982906	0.950067	0.944753	1.02461	0.0185		0.939383	1.01057	0.995542	0.967012	0.930773	1.17822	0.987543	1.06944	1.0508	1.03209	0.970893	0.952698	0.981892	0.975917	0.977133	1.00133	0.01668				RecSite13	0.985	1.3762		RecSite13	0.981697	1.01359			ACSF before	0.9989	0.0321
-3	1.13355	1.01437	1.06406	1.07462	1.01895	1.02239	1.02449	1.04196	1.03762	1.0516	1.06781	0.979741	0.962611	1.02923	1.03736	0.0116		0.9174	0.946924	1.04098	1.02102	0.957624	1.18253	0.946424	1.16166	1.10796	1.06081	0.959598	0.915917	1.02363	0.963754	0.95184	1.01054	0.02286				RecSite14	0.9806	2.0961		RecSite14	0.976359	1.01302			CCK before	1.01288	0.0292554
-1.5	1.13355	1.01437	1.06406	1.07462	0.934559	1.02239	1.02449	1.04196	1.03762	1.0516	1.06781	0.979741	0.999097	1.02923	1.03394	0.01303		0.9174	0.971715	1.03519	1.02102	0.935537	1.18253	0.946424	1.16166	1.10796	1.06081	0.959598	0.915917	0.97365	0.963754	0.95184	1.007	0.02297								RecSite15	0.992066	1.08168
--	0	0	0	0	0	0	0	0	0	0	0	0	0	0	0	0		0	0	0	0	0	0	0	0	0	0	0	0	0	0	0	0	0													ACSF after	0.9528	0.11377
--	0	0	0	0	0	0	0	0	0	0	0	0	0	0	0	0		0	0	0	0	0	0	0	0	0	0	0	0	0	0	0	0	0													CCK after	1.36464	0.286484
--	0	0	0	0	0	0	0	0	0	0	0	0	0	0	0	0		0	0	0	0	0	0	0	0	0	0	0	0	0	0	0	0	0
1.5	1.76408	0.989644	1.63727	1.52422	1.8007	0.867835	1.38788	1.1301	1.02139	1.26581	1.47797	1.05905	1.37263	2.05404	1.38233	0.09722		0.971412	1.06536	0.698613	0.774242	0.898392	0.743284	1.17908	0.97266	1.18378	0.881743	0.972486	0.684382	1.04457	1.03098	1.101	0.9468	0.04373
3	1.69984	1.04744	1.24036	1.52422	1.71469	0.930953	1.24953	1.1617	1.04521	1.25483	1.49875	1.05175	1.39285	2.05404	1.34758	0.08841		0.990733	1.08281	0.719163	0.774242	0.898392	0.743284	1.17908	0.97266	1.05614	0.881743	0.999331	0.777264	1.01913	1.07004	1.101	0.951	0.0386
4.5	1.6356	1.10523	1.27521	1.59148	1.62869	0.99407	1.22344	1.1933	1.0828	1.20148	1.52113	1.04445	1.41308	2.09945	1.35781	0.08535		0.978807	1.08192	0.749987	0.792448	0.893123	0.895221	1.16622	1.17826	0.928507	0.89662	1.01657	0.870145	0.993686	1.1091	1.11278	0.97756	0.03533
6	1.60438	1.09925	1.44526	1.62099	1.45668	0.99515	1.19735	1.13511	1.12039	1.18462	1.51423	1.06014	1.38565	2.14486	1.35458	0.08568		0.966882	1.05833	0.79694	0.810654	0.887853	0.940702	1.18492	0.98724	1.02877	0.880132	1.01749	0.966968	1.01838	1.07786	1.12455	0.98318	0.02913
7.5	1.57316	1.09327	1.61532	1.50182	1.42218	0.996229	1.2361	1.11581	1.06683	1.21049	1.50734	1.05145	1.35823	2.05424	1.34303	0.08127		0.916974	1.02338	0.843893	0.733884	0.829334	0.932956	1.20361	1.0304	0.876063	0.902296	0.964495	0.986351	1.04307	1.04663	1.13372	0.96447	0.03257
9	1.45456	1.05997	1.33918	1.46909	1.38768	1.00867	1.27485	1.11597	1.03954	1.23635	1.42984	1.04276	1.38413	2.02485	1.30482	0.07401		0.977439	0.988435	0.915303	0.750709	0.819647	0.919663	1.1154	1.12068	0.980144	0.924461	0.911496	0.967013	0.996375	1.10486	1.10448	0.97307	0.02883
10.5	1.50327	1.03944	1.32603	1.43636	1.43675	1.02111	1.19424	1.10271	1.03475	1.17727	1.48215	1.05828	1.36711	1.99546	1.29821	0.07459		1.00232	0.900752	0.90225	0.767535	0.809961	0.90637	1.10396	1.21096	1.09467	0.935536	0.868822	0.972637	0.981843	1.12506	1.07523	0.97719	0.03339
12	1.55198	1.01892	1.31287	1.49009	1.48581	1.09542	1.28617	1.1338	1.0412	1.15166	1.45372	1.07379	1.44066	2.03113	1.32623	0.07659		1.02403	0.900414	0.889197	0.761045	0.849108	0.882328	1.09869	0.909601	1.14106	0.942945	0.858274	0.990742	0.983391	1.10223	1.06813	0.96008	0.02938
13.5	1.49889	1.06582	1.48271	1.62129	1.63573	1.04629	1.22976	1.1649	1.09506	1.15845	1.47051	1.10464	1.38913	2.08508	1.36059	0.0819		1.04129	0.900076	0.989717	0.754556	0.889347	0.858287	1.09651	0.878506	0.989002	0.931117	0.847725	0.893985	0.98494	1.0794	1.06103	0.94637	0.02623
15	1.57625	1.09741	1.65255	1.66325	1.66195	0.925477	1.17336	1.24035	1.14892	1.18145	1.4873	1.05927	1.3593	2.13903	1.38328	0.09117		1.03165	0.979915	1.04857	0.788573	0.929586	0.742171	1.15754	0.847411	0.836943	0.919289	0.832112	0.797228	1.01459	1.07625	1.11448	0.94109	0.03481
16.5	1.65362	1.07282	1.53829	1.66058	1.56577	1.05438	1.29618	1.16815	1.15835	1.20444	1.49345	1.03757	1.34033	2.03201	1.37685	0.08075		1.00855	0.985969	1.08075	0.822591	0.816209	0.76478	1.21857	0.853172	0.930273	0.888226	0.927514	0.912664	1.03451	1.07309	1.12062	0.9625	0.03403
18	1.62746	1.04823	1.42403	1.60779	1.46959	1.05738	1.22318	1.13941	1.16778	1.22275	1.49959	1.05478	1.35819	2.17824	1.36274	0.08576		0.985461	0.986736	1.09667	0.78079	0.797555	0.787389	1.1238	1.08286	1.0236	0.883938	0.902329	0.878484	1.02787	1.06562	1.12675	0.96999	0.0329
19.5	1.6013	1.02456	1.45407	1.555	1.43268	1.06038	1.25277	1.12012	1.11296	1.24106	1.49135	1.072	1.37604	2.21187	1.35758	0.08713		0.967567	0.987504	1.0169	0.758646	0.789088	0.826253	1.12273	1.17743	0.758986	0.879651	0.877145	0.844303	1.02123	1.05815	1.10626	0.94612	0.03673
21	1.66562	1.01572	1.48412	1.45208	1.39576	0.937473	1.28236	1.11875	1.08317	1.23565	1.48311	1.0506	1.39081	2.14163	1.33835	0.08731		0.949673	0.983153	0.937124	0.736503	0.806088	0.865117	1.12167	1.20446	0.864792	0.855807	0.867375	0.840962	0.98802	1.12251	1.073	0.94775	0.03572
22.5	1.67522	1.0143	1.26494	1.51898	1.40096	1.04155	1.26463	1.12634	1.11593	1.23024	1.43622	1.03951	1.40559	2.07138	1.32898	0.08066		0.964403	0.978801	0.85907	0.800591	0.823088	0.781511	1.17828	1.20974	0.970599	0.840408	0.857606	0.730686	1.02591	1.13365	1.03975	0.94627	0.0399
24	1.68483	1.01287	1.4606	1.44581	1.40615	1.06341	1.24689	1.13393	1.14869	1.20971	1.43812	1.1053	1.42278	1.99921	1.34131	0.07471		0.979132	0.936785	0.829729	0.796131	0.916536	0.718527	1.20079	1.21502	1.02079	0.84499	0.915303	0.780051	0.989816	1.1278	1.0737	0.95634	0.04047
25.5	1.63974	1.04667	1.65625	1.39999	1.43857	1.08527	1.33514	1.25071	1.16306	1.18918	1.44003	1.11026	1.36427	2.00364	1.36591	0.0734		0.979232	0.894768	0.891292	0.791671	0.98986	0.712612	1.22331	0.987841	0.94282	0.849572	0.875654	0.829416	0.989015	1.09851	1.10684	0.94416	0.03531
27	1.59624	1.08046	1.61298	1.37855	1.47099	1.02084	1.34512	1.18537	1.17743	1.2195	1.50984	1.11522	1.35034	2.00806	1.36221	0.07345		0.979332	0.952623	0.952855	0.718663	1.00356	0.706696	1.20342	1.07104	0.864848	0.889728	0.836004	0.890189	0.988214	1.06923	1.11937	0.94972	0.03692
28.5	1.55275	1.0998	1.5697	1.36929	1.61916	0.956416	1.3551	1.18422	1.11388	1.22762	1.42951	1.05934	1.40905	2.08909	1.35964	0.08131		0.916412	0.968568	1.0336	0.788502	0.987443	0.757849	1.18354	1.15424	0.919575	0.929884	0.918423	0.855498	1.04751	1.10033	1.13956	0.98006	0.03462
30	1.62818	1.10567	1.33243	1.35943	1.68555	1.07192	1.28681	1.18307	1.09973	1.23482	1.49839	1.04247	1.39753	2.00844	1.35246	0.07644		0.983761	0.984513	1.04393	0.818446	0.925031	0.840613	1.20113	0.853827	0.974302	0.951792	0.905039	0.820807	1.01208	1.13143	1.12076	0.97116	0.03129
31.5	1.62381	1.10481	1.28686	1.35235	1.54752	1.11079	1.24524	1.24612	1.08558	1.24202	1.50383	1.11855	1.386	2.16395	1.35839	0.07989		0.968775	0.958548	0.983719	0.814054	0.862619	0.781703	1.21871	0.718229	0.780709	0.970595	0.920506	0.75408	1.03059	1.13646	1.10196	0.93342	0.0398
33	1.61943	1.10395	1.24129	1.34666	1.40949	0.995598	1.20367	1.26111	1.21725	1.19173	1.50928	1.11159	1.43846	2.17369	1.34451	0.0812		0.953789	0.956807	0.923504	0.809662	0.833996	0.722793	1.13672	0.784292	0.723332	0.94743	0.918902	0.710448	1.04909	1.13111	1.04418	0.90974	0.03812
34.5	1.69314	1.08845	1.38742	1.48892	1.50622	0.955011	1.34304	1.2761	1.23512	1.24788	1.48573	1.06306	1.45003	2.18342	1.38597	0.08439		0.94147	0.955066	0.945028	0.765812	0.805373	0.840178	1.07755	0.850355	0.861743	0.924264	0.917298	0.802507	1.01566	1.12576	1.04027	0.92456	0.0284
36	1.62887	1.07295	1.30973	1.63118	1.60295	0.914424	1.24144	1.1704	1.23305	1.21565	1.46218	1.03356	1.44116	2.04739	1.3575	0.08325		0.929151	0.903936	0.966551	0.83336	0.929253	0.734268	1.08929	1.11808	1.00015	0.859129	0.834282	0.894565	0.983062	1.11004	1.03636	0.9481	0.02966
37.5	1.56461	1.08124	1.23204	1.54145	1.46696	0.948446	1.22488	1.28478	1.23098	1.18342	1.51907	0.998782	1.43229	2.05313	1.34015	0.0791		0.951132	0.916955	1.0311	0.820973	0.875625	0.683045	1.13647	0.829842	0.958835	0.870341	0.864706	0.806747	0.967284	1.00969	1.10486	0.92184	0.03198
39	1.53556	1.08954	1.25609	1.45172	1.39696	0.913532	1.20832	1.3019	1.09998	1.20264	1.52923	1.00903	1.40081	2.05886	1.31816	0.0792		0.969826	0.880183	0.891695	0.808586	0.821996	0.659164	1.18366	0.753543	0.917515	0.881552	0.895131	0.718928	0.966423	0.996937	1.08915	0.89562	0.03659
40.5	1.52403	1.11946	1.56396	1.42832	1.39874	0.905117	1.27682	1.20636	1.11859	1.22186	1.50961	1.04179	1.38529	2.15796	1.34699	0.08448		0.956671	0.960456	0.950445	0.804472	0.871558	0.725138	1.21215	0.660464	0.796295	0.918371	0.896242	0.792248	0.973022	1.0028	1.07345	0.90625	0.03731
42	1.52127	1.13943	1.74999	1.4595	1.40052	0.953802	1.27253	1.16632	1.1372	1.19967	1.48999	1.07455	1.36977	2.10987	1.36031	0.08372		0.943516	0.896513	1.0092	0.800359	0.921119	0.791112	1.1874	0.719218	0.924267	0.931833	0.896522	0.897085	0.991286	1.00865	1.06029	0.93189	0.0306
43.5	1.64403	1.12465	1.82492	1.49068	1.53028	1.00249	1.18317	1.15402	1.1396	1.17748	1.44058	1.03801	1.40313	2.06177	1.37249	0.08716		0.949127	0.870721	0.971599	0.796006	0.88329	0.723702	1.16265	0.85389	0.965139	0.933616	0.896802	0.832954	1.00955	1.03313	1.04713	0.92862	0.02951
45	1.70216	1.09249	1.76073	1.38726	1.55419	0.936729	1.19381	1.14173	1.142	1.20286	1.42034	1.04676	1.37154	2.05414	1.35762	0.08764		0.954737	0.850835	1.00821	0.791652	0.84546	0.723988	1.14516	0.988562	1.00601	0.885329	0.912022	0.768824	0.997372	1.0977	1.09497	0.93805	0.03384
46.5	1.72797	1.06033	1.62698	1.32321	1.5781	0.94824	1.20444	1.20118	1.22864	1.25008	1.44936	1.05551	1.32651	2.04651	1.35908	0.08309		0.951474	0.892001	1.04482	0.807645	0.920357	0.862575	1.12766	1.04355	1.07023	0.837042	0.936911	0.765104	0.985195	1.03069	1.09498	0.95802	0.02952
48	1.72016	1.03632	1.49323	1.38334	1.49616	1.07907	1.24427	1.26062	1.22863	1.27912	1.47838	1.11735	1.30676	2.07653	1.37142	0.07633		0.930963	0.933167	1.06735	0.823638	0.829901	0.919836	1.10443	1.09854	1.12269	0.837875	0.933689	0.761384	1.01998	0.983804	1.09499	0.96415	0.03145
49.5	1.71234	1.01231	1.29715	1.44346	1.40558	0.986812	1.2841	1.29684	1.22861	1.25785	1.50169	1.09758	1.3093	2.10655	1.35287	0.08005		0.925666	0.891068	1.04799	0.79297	0.862106	0.901302	1.12237	0.931603	1.07134	0.838708	0.833667	0.813143	1.0433	0.95094	1.11429	0.9427	0.02969
51	1.66059	1.02537	1.46549	1.62778	1.47109	1.10413	1.20413	1.31934	1.14194	1.23658	1.53137	1.08252	1.323	2.14467	1.38129	0.08316		0.920369	0.897171	1.02863	0.812012	0.894311	0.882769	1.14031	0.902196	1.01999	0.848639	0.891754	0.864901	1.01904	0.95813	1.09598	0.94508	0.02542
52.5	1.60884	1.03843	1.63383	1.43164	1.5366	1.09127	1.18098	1.28336	1.14775	1.24732	1.50319	1.06747	1.37492	2.18278	1.3806	0.08503		0.991141	0.903273	0.96738	0.831054	0.827753	0.866796	1.18364	1.14905	0.864834	0.83533	0.903629	0.764415	0.994776	0.985346	1.07767	0.94307	0.03275
54	1.69956	1.01822	1.56716	1.42803	1.51532	1.0784	1.29949	1.24739	1.14961	1.21835	1.475	1.07049	1.42685	2.1239	1.37984	0.08225		0.949639	0.92091	1.00326	0.811834	0.840386	0.850824	1.22697	1.24771	0.916418	0.832561	0.915505	0.755599	1.0161	1.01256	1.07949	0.95865	0.03832
55.5	1.61618	1.01986	1.50048	1.42443	1.49405	0.983926	1.2899	1.15294	1.21292	1.18938	1.42556	1.13386	1.45378	2.06503	1.35445	0.07784		0.952192	0.938547	1.02085	0.810591	0.85302	0.800447	1.22803	1.21261	0.968003	0.828829	0.882984	0.746784	1.03743	1.07935	1.06271	0.96149	0.03903
57	1.60775	1.0215	1.23004	1.61335	1.57735	0.959708	1.28031	1.22982	1.19065	1.18633	1.4434	1.11835	1.4491	2.08615	1.3567	0.08239		0.954745	0.912527	1.03843	0.809349	0.944844	0.75007	1.22908	1.17751	0.747832	0.887591	0.850464	0.854979	0.987413	1.04611	1.04593	0.94913	0.03795
58.5	1.59933	1.04498	1.46853	1.46565	1.56599	0.93549	1.19868	1.30076	1.16837	1.18329	1.46124	1.11882	1.44441	2.10726	1.36163	0.0819		0.944894	0.912357	0.902921	0.835167	0.974102	0.851714	1.22069	1.24116	0.743395	0.869289	0.870904	0.740123	1.00671	1.01288	1.1086	0.94899	0.04021
60	1.59496	1.07244	1.47326	1.49235	1.55462	0.853128	1.3149	1.22374	1.15195	1.1826	1.47751	1.11929	1.34709	2.02196	1.34856	0.07945		0.935043	0.948074	0.978476	0.814633	0.956001	0.90621	1.21229	1.1078	0.872835	0.850987	0.873394	0.762536	1.026	1.0704	1.04219	0.95712	0.03193
[truncated: 2 more columns]

## Sheet: 1S1A
	Primary VC						Associative VC								two-way Anova
Layer1	5.62253	2.69259	0	0	0		0	1.90728	1.57278	0	0
Layer2/3	4.8818	2.44824	4.17533	6.66555	4.90715		3.76162	1.30785	11.2532	8.42394	6.82912				ANOVA table	DF	F (DFn, DFd)	P value
Layer4	5.04619	2.1532	13.4083	7.03358	2.70711		11.545	7.30802	21.5361	7.11537	5.8068				Interaction	4	F (4, 40) = 4.707	P=0.0033
Layer5	4.62691	6.79567	11.8335	23.1454	10.7548		15.5209	23.5678	28.5701	43.7554	33.0415				Layers	4	F (4, 40) = 17.18	P<0.0001
Layer6	1.33356	6.5414	8.54818	12.9222	9.52805		6.68935	2.9365	9.53987	15.5393	9.07823				Division	1	F (1, 40) = 9.768	P=0.0033
															Residual	40
															Bonferroni comparison
															Layer1:Primary VC vs. Layer1:Associative VC	p>0.9999
															Layer2/3:Primary VC vs. Layer2/3:Associative VC	p>0.9999
															Layer4:Primary VC vs. Layer4:Associative VC	p>0.9999
															Layer5:Primary VC vs. Layer5:Associative VC	p = 0.0003
															Layer6:Primary VC vs. Layer6:Associative VC	p>0.9999
															Layer1:Associative VC vs. Layer5:Associative VC	p<0.0001
															Layer2/3:Associative VC vs. Layer5:Associative VC	p<0.0001
															Layer4:Associative VC vs. Layer5:Associative VC	p=0.0002
															Layer6:Associative VC vs. Layer5:Associative VC	p<0.0001

## Sheet: 1S1F-G
	CCK alone									LTP curve				pair T-test
Time (min)	RecSite1	RecSite2	RecSite3	RecSite4	RecSite5	RecSite6	RecSite7	RecSite8		mean	sem			before	after
-22.5	1.05382	1.1867	0.952152	1.05351	0.913578	0.962329	0.806057	0.808471		0.967078	0.0489526		RecSite1	1.01166	0.739869
-21	1.05075	1.07014	0.88981	1.06983	1.10687	1.06787	1.13497	1.56333		1.1192	0.0731835		RecSite2	1.04737	0.898293
-19.5	1.04767	0.953585	0.827468	0.832817	0.919742	1.05096	1.07412	1.48506		1.02393	0.0792031		RecSite3	1.01534	1.02253
-18	0.998563	1.03348	0.982163	1.08677	0.732611	1.03404	1.08983	0.547348		0.9381	0.0733922		RecSite4	0.98359	1.58813
-16.5	0.879673	1.11337	1.13686	1.06767	1.27119	1.1584	0.675326	1.54537		1.10598	0.0971285		RecSite5	1.06199	0.894278
-15	0.834195	1.19851	1.09971	1.04857	0.984375	0.93444	0.811292	1.48448		1.04945	0.0826248		RecSite6	0.962614	0.893283
-13.5	0.788716	1.11414	1.10665	0.818764	0.697555	1.09912	1.21306	1.42359		1.0327	0.092522		RecSite7	1.26398	1.03867
-12	1.09582	0.983274	0.855022	0.869936	1.12741	1.00889	1.03035	1.20529		1.022	0.0458259		RecSite8	0.988424	1.1504
-10.5	1.09973	1.10182	0.952637	0.921107	1.05311	0.918653	0.847651	0.428137		0.915356	0.0822066
-9	1.10363	0.727656	0.852745	0.877212	0.978813	0.904746	1.13613	1.4611		1.00526	0.0859666
-7.5	1.02871	0.765726	0.931124	0.833316	1.2215	0.883025	1.13498	1.46314		1.03269	0.0874986
-6	0.953796	1.23052	1.09455	1.10392	1.01586	0.924724	1.53977	0.847226		1.0888	0.0823808		t=0.1357, df=7, p=0.8959, n=8
-4.5	0.916462	1.10532	1.0104	1.08143	1.09679	1.09137	1.61658	0.66887		1.0734	0.0999222
-3	1.12346	1.12335	1.12526	1.12102	1.17772	0.930587	1.65498	0.490514		1.09336	0.120885
-1.5	1.17203	1.12335	1.12526	1.16062	1.26678	0.930587	1.65498	0.4119		1.10569	0.131537
--	0	0	0	0	0	0	0	0		0	0
--	0	0	0	0	0	0	0	0		0	0
--	0	0	0	0	0	0	0	0		0	0
1.5	0.73203	1.05525	1.21075	1.00135	0.948241	0.937113	1.42096	1.12552		1.0539	0.0776741
3	0.432748	0.749608	1.18177	1.06747	0.736198	0.807388	0.928954	1.45577		0.919987	0.118692
4.5	0.586002	0.839561	1.04768	1.13358	0.772494	0.777349	1.09395	1.20043		0.931381	0.082055
6	0.635235	0.929514	0.913591	1.13333	0.808789	0.74731	1.04524	0.945103		0.894764	0.0606332
7.5	0.88254	0.827504	0.876293	1.13308	1.26936	1.06997	1.35242	1.02666		1.05473	0.0721342
9	0.761275	0.907767	0.838994	1.4196	1.10569	1.08006	1.37781	1.10822		1.07493	0.0897392
10.5	0.656871	0.988031	0.904314	1.70612	1.32236	1.14936	1.27472	0.824362		1.10327	0.125591
12	0.552466	1.05718	1.17487	1.16924	1.40082	1.21866	1.17163	1.30945		1.13179	0.0966284
13.5	0.706727	1.13061	1.09117	1.82738	1.38206	1.23049	1.256	1.42217		1.25582	0.120815
15	0.794008	1.0674	1.13773	1.6901	1.3633	1.16456	1.34036	1.53488		1.26154	0.106518
16.5	0.881289	1.00419	1.18429	1.55282	1.35624	1.01543	1.13512	1.27521		1.17557	0.0818428
18	0.651109	0.804351	0.892667	1.17318	1.34918	0.866306	0.990603	1.65608		1.04793	0.124003
19.5	0.897087	0.751364	0.911801	1.20624	1.2295	1.22589	0.846091	1.36946		1.05468	0.0860346
21	0.80506	0.91211	1.07721	1.36043	0.864565	1.21647	1.14653	1.06201		1.05555	0.0710607
22.5	0.713032	0.899076	1.01284	1.05652	1.03658	1.20704	0.781847	0.903428		0.951296	0.0602786
24	0.50118	1.02079	0.948468	1.27979	1.20859	1.17294	0.954859	0.843763		0.991298	0.0936181
25.5	0.567462	1.05783	0.986423	1.50306	1.17525	1.20783	1.12787	1.16215		1.09848	0.0992464
27	0.633743	0.9272	1.10709	1.13245	0.93124	1.23382	1.39822	1.48054		1.10554	0.103829
28.5	0.861749	0.814481	1.14708	1.88412	1.0313	0.987531	1.01244	1.35144		1.13627	0.130391
30	0.906087	0.80337	0.82513	1.4197	1.13136	1.18665	1.13112	1.22234		1.07822	0.0813139
31.5	0.950425	0.792259	1.10958	1.62685	1.24333	1.26461	1.2498	1.16888		1.17572	0.0929891
33	0.449587	0.854598	1.00829	1.83401	1.35531	1.27824	1.4104	1.11542		1.16323	0.155969
34.5	0.567055	0.907497	0.916208	1.3881	1.32758	1.19631	1.07329	1.17208		1.06852	0.100704
36	0.567184	0.960395	0.824121	1.2375	1.15488	1.11437	1.08446	1.22873		1.02146	0.0867884
37.5	0.481077	0.822912	0.795293	1.0869	1.30926	1.20265	1.09562	1.29118		1.01061	0.108782
39	0.609533	1.0719	1.12259	1.5974	0.765961	1.07018	1.14477	1.23852		1.07761	0.112387
40.5	0.498588	1.04928	0.983999	1.67002	1.07925	1.03545	1.19391	1.64035		1.14386	0.142332
42	0.670406	1.02666	0.845408	1.74264	1.2732	1.05867	0.932762	1.13766		1.08593	0.121826
43.5	0.842223	1.00573	0.886735	1.362	1.21383	1.11103	1.26248	1.03349		1.08969	0.0688854
45	0.877779	0.984794	0.928062	1.36278	1.00326	0.840904	1.24038	0.900634		1.01733	0.0703541
46.5	0.913335	1.05564	1.05634	1.36357	1.02812	0.739073	1.059	0.936829		1.01899	0.066918
48	0.838072	0.97929	1.18463	1.60414	0.724864	0.794736	1.38879	0.973023		1.06094	0.11656
49.5	0.76281	0.902938	0.967034	1.84471	0.64445	0.962498	1.26545	0.79745		1.01842	0.144059
51	0.706589	0.783382	0.889773	1.67111	0.779779	1.13026	1.14211	1.10995		1.02662	0.118462
52.5	0.650369	0.753996	0.812512	1.61225	0.915108	0.894433	0.829228	1.42244		0.986292	0.129144
54	0.575167	0.894238	1.08585	1.46456	1.26618	0.942411	1.08017	1.71712		1.12821	0.133875
55.5	0.701041	1.03448	1.20952	1.46941	0.771723	0.905706	1.00095	1.73911		1.10399	0.133674
57	0.648381	0.754927	0.913128	1.47426	1.13563	0.869002	0.789364	1.06343		0.956015	0.0994506
58.5	0.750434	0.865689	1.01315	1.61717	0.937519	0.759505	0.873681	0.885586		0.962842	0.105089
60	0.852487	0.958347	1.09339	1.76009	0.739411	0.935209	0.957998	0.85905		1.0195	0.119579

## Sheet: 1S1H-I
	CCK + Pre											LTP curve				pair T-test
Time (min)	RecSite1	RecSite2	RecSite3	RecSite4	RecSite5	RecSite6	RecSite7	RecSite8	RecSite9	RecSite10		mean	sem			before	after
-22.5	1.0745	0.975681	1.21641	1.04298	0.66906	0.567688	0.658253	1.05846	0.916607	0.757819		0.893746	0.0723636		RecSite1	0.925309	1.0674
-21	1.09463	1.00945	0.877942	0.583525	0.873024	0.619301	0.672157	0.967904	0.945	0.931015		0.857395	0.0578824		RecSite2	0.985154	1.02131
-19.5	0.984236	1.04322	0.961196	1.01749	1.07699	1.5055	1.32944	1.11677	0.99328	1.0035		1.10316	0.0589184		RecSite3	0.950514	0.807568
-18	0.992099	1.09454	1.06585	0.744006	1.05785	0.665602	0.807082	0.875981	1.04156	1.07598		0.942055	0.0521821		RecSite4	0.929466	0.94496
-16.5	0.999962	1.13357	1.17051	1.20501	0.951665	0.915626	0.949984	1.14528	0.982359	0.716946		1.01709	0.0496306		RecSite5	1.04521	0.978273
-15	0.885289	1.17261	1.19598	1.37195	0.743891	0.768665	0.848672	0.879087	0.923157	1.04178		0.983107	0.0685954		RecSite6	0.982045	1.45561
-13.5	0.853418	0.696138	1.22144	0.953972	0.995288	0.621704	0.747361	1.08178	1.05421	0.744963		0.897028	0.0648424		RecSite7	1.01845	1.29534
-12	0.821547	0.783937	1.09303	0.535991	1.24569	0.811344	0.975018	1.01872	1.07231	1.03256		0.939015	0.0674505		RecSite8	1.04684	1.02839
-10.5	0.872477	0.871735	0.964613	0.754407	0.976429	1.00098	1.20268	0.955657	0.906605	1.32017		0.982575	0.0551176		RecSite9	1.07464	1.00267
-9	1.08205	1.01074	0.774666	0.961222	1.15455	0.928138	1.15934	0.825315	1.07068	0.800857		0.976756	0.0475747		RecSite10	1.02329	1.17306
-7.5	1.20119	1.14974	0.750131	0.886302	0.749687	0.931635	1.15993	1.13714	1.07456	1.20331		1.02436	0.0599318
-6	0.966935	1.15843	0.725595	0.811383	1.20946	1.49638	1.08507	1.18611	1.07844	0.996465		1.07143	0.0723808
-4.5	0.888631	0.827234	1.01665	1.16874	1.1592	1.4827	1.26028	1.19124	1.16122	0.789622		1.09455	0.0715364		t=1.347, df=9, p=0.2110, n=10
-3	0.810328	1.00274	0.926564	1.00648	1.10894	0.889449	0.873058	1.12821	1.20262	1.18474		1.01331	0.0460097
-1.5	0.871211	1.17824	0.836479	0.844212	1.10894	0.889449	0.873058	1.06518	1.20262	1.11843		0.998782	0.0495513
--	0	0	0	0	0	0	0	0	0	0		0	0
--	0	0	0	0	0	0	0	0	0	0		0	0
--	0	0	0	0	0	0	0	0	0	0		0	0
1.5	1.25225	1.04759	0.907375	0.563081	0.757632	1.39056	1.63799	1.11556	1.12217	1.03196		1.08261	0.102121
3	1.17741	1.25516	0.907375	0.563081	0.757632	1.39056	1.33698	1.15671	1.06785	1.03196		1.06447	0.0867459
4.5	1.05322	1.12061	0.762005	0.509225	0.845962	1.15768	1.03598	1.08946	1.23095	1.44238		1.02475	0.0871839
6	1.2458	1.03717	0.616636	0.529495	0.778767	0.880254	1.52769	1.02222	1.23458	1.31499		1.01876	0.106753
7.5	0.922903	0.953644	0.636657	0.549766	0.711572	1.2879	1.19212	1.01691	1.18386	1.58315		1.00385	0.106564
9	1.09869	0.832911	0.656679	0.644164	0.791172	0.856996	0.817607	1.0116	0.930002	1.35605		0.899587	0.0711849
10.5	1.14345	1.06225	0.969303	0.823965	0.886648	0.834932	0.8375	1.08889	1.00777	1.52358		1.01783	0.0704314
12	0.959044	1.29158	1.00109	1.02511	0.982124	0.812868	1.05271	1.05244	1.08554	1.63706		1.08996	0.0753947
13.5	0.879445	1.26979	0.752031	0.943148	0.799886	0.701377	1.21065	1.10985	1.17015	1.75054		1.05869	0.105146
15	0.799846	0.930005	0.748533	0.775621	0.802718	1.50838	1.36858	1.10319	1.05924	1.03407		1.01302	0.0864518
16.5	0.889076	0.655255	0.778146	1.12867	0.805551	1.16384	1.14089	1.01847	0.948335	1.27922		0.980746	0.0665465
18	1.04525	0.593745	0.685074	0.68919	0.746765	0.819308	0.9132	1.00754	1.17581	1.37881		0.90547	0.0825734
19.5	1.20143	0.590094	0.66346	0.520433	0.68798	1.37539	1.31267	0.99122	1.19163	1.54578		1.00801	0.122822
21	0.875144	0.615372	0.641847	0.541814	0.754623	1.10141	0.872215	0.974899	1.20745	1.71274		0.929751	0.11605
22.5	0.772817	0.64065	0.770532	0.563196	0.821267	0.827423	1.02389	1.02173	1.15317	0.933312		0.852799	0.0606747
24	0.752195	0.718609	0.797031	0.639901	1.03357	1.01331	1.17557	1.04402	0.970289	1.45367		0.959816	0.0813523
25.5	0.835772	0.874269	0.82353	0.716606	0.795204	1.41097	1.48602	0.918474	1.13891	1.34654		1.03463	0.095279
27	0.881243	0.946876	0.582914	0.950984	0.712993	1.65053	1.12859	0.90654	1.04821	1.23941		1.00483	0.0983522
28.5	0.926713	1.01948	0.575274	0.564484	0.728351	1.75204	1.18748	0.894607	0.957508	1.44443		1.00504	0.124746
30	0.866653	1.17742	0.567635	0.664311	0.743709	1.78453	1.24636	0.996281	1.03231	1.64946		1.07287	0.134279
31.5	0.806593	1.12125	0.63745	0.764139	0.927142	1.59907	1.2271	1.13067	0.954407	1.57539		1.07432	0.108294
33	0.82876	1.06508	0.881224	0.748	0.915909	1.41361	1.20784	0.97662	0.969544	1.50133		1.05079	0.0831122
34.5	0.850927	0.794798	0.944894	0.878827	0.904677	0.967202	1.0388	1.03727	0.984681	1.1706		0.957267	0.0362064
36	0.781934	0.688046	0.768635	0.885617	0.798269	1.32147	0.869755	1.09792	1.09293	0.839866		0.914444	0.0650882
37.5	1.10802	1.0887	0.96683	0.767796	0.756663	1.67574	1.51096	1.00441	1.20118	0.776409		1.08567	0.103552
39	1.14772	1.11245	0.785183	0.68878	0.701969	1.31184	1.24334	1.042	1.18337	1.17732		1.0394	0.0765025
40.5	1.18742	1.0234	0.603536	0.883759	0.850108	0.947941	0.97572	1.07959	1.16556	1.57824		1.02953	0.0854561
42	1.24454	1.28286	0.600926	0.59092	0.720311	1.27873	1.24577	0.94004	1.04768	1.39575		1.03475	0.101419
43.5	0.875808	0.69502	0.715555	0.690783	0.727332	1.02448	1.33901	0.913035	0.914766	1.21327		0.910906	0.075012
45	0.780449	0.849235	0.734263	0.790646	0.972076	0.770232	1.43226	0.886031	0.865393	1.04297		0.912355	0.0686676
46.5	1.09222	1.00345	0.744905	0.886194	1.04987	1.55424	1.53411	0.969021	0.886794	0.872664		1.05935	0.0913717
48	0.969798	0.736753	0.755548	0.981743	0.851201	1.33532	1.17464	1.13994	0.908194	1.29491		1.0148	0.0709869
49.5	1.04579	1.06794	0.735045	0.883825	0.906768	1.36393	1.23245	0.982747	1.02154	1.16514		1.04052	0.0605735
51	0.859297	0.993221	0.714542	0.785907	0.962335	1.39254	1.29027	0.952145	1.13488	1.09425		1.01794	0.0714126
52.5	0.919809	1.0888	0.97589	1.16033	0.977351	1.15468	0.821116	0.921544	0.973489	1.3396		1.03326	0.0506945
54	0.968881	1.18453	0.864739	0.968652	1.05477	1.76559	1.6052	1.04232	0.994982	1.35388		1.18035	0.10009
55.5	1.01795	1.28027	0.860051	1.07747	0.999902	1.54883	1.3291	1.16309	1.01648	1.36815		1.16613	0.0703077
57	1.28002	0.922224	0.855363	1.01774	0.94503	1.33208	1.053	1.07585	1.147	1.20621		1.08345	0.0523573
58.5	1.31361	0.952699	0.808319	0.958009	0.993512	1.60172	1.3584	0.988603	1.03012	1.04428		1.10493	0.0803199
60	1.2066	0.983175	0.761276	0.729726	1.04199	1.50713	1.55515	1.04864	0.91325	0.991516		1.07384	0.0926673

## Sheet: 1S1J-K
	CCK + Post											LTP curve				pair T-test
Time (min)	RecSite1	RecSite2	RecSite3	RecSite4	RecSite5	RecSite6	RecSite7	RecSite8	RecSite9	RecSite10		mean	sem			before	after
-22.5	1.09982	1.19579	1.287	1.46385	1.34648	1.33061	1.10876	0.956128	0.767526	1.05236		1.16083	0.069125		RecSite1	0.970016	1.02616
-21	1.03317	1.08752	0.554166	0.684238	1.08128	1.15652	0.886258	0.93292	1.08146	1.169		0.966653	0.06848		RecSite2	0.919614	0.978242
-19.5	0.929514	0.979253	0.5003	0.583988	0.757599	0.741149	0.888051	0.996027	1.02751	1.28564		0.868903	0.0767355		RecSite3	1.15891	0.997388
-18	1.03725	1.23985	0.480554	0.483738	0.833983	0.844303	1.00346	1.0421	0.973566	1.11023		0.904904	0.0839804		RecSite4	1.13351	1.06772
-16.5	1.14499	0.964094	0.770903	0.41588	0.910367	0.947458	1.01572	1.07317	1.21773	0.934821		0.939513	0.0743247		RecSite5	1.04096	0.85461
-15	1.1401	1.10552	1.06125	0.859333	1.03444	1.40194	1.02797	1.10424	1.4619	0.732105		1.09288	0.072652		RecSite6	1.0601	0.940078
-13.5	0.875803	0.965525	0.887695	0.778451	1.15852	1.06407	1.04977	1.00557	1.31856	0.596087		0.970005	0.0671906		RecSite7	1.00293	0.885457
-12	0.889309	0.905126	1.14808	0.932521	1.18333	1.04335	1.04294	1.10887	0.913755	0.915078		1.00824	0.0370007		RecSite8	1.05499	0.947135
-10.5	0.902814	1.12432	0.9654	1.02348	1.20814	1.02262	1.04193	1.1128	1.04464	1.23407		1.06802	0.0343327		RecSite9	1.07404	1.57197
-9	1.03671	0.915224	1.46539	1.51041	0.776532	0.687772	1.04092	1.11672	1.17553	0.9287		1.06539	0.0889929		RecSite10	0.919606	1.60536
-7.5	1.02049	0.871836	1.09839	1.37994	0.722708	0.766825	0.835189	1.00685	1.11006	1.32571		1.0138	0.0741741
-6	1.00427	0.828448	1.45899	1.42621	0.876549	0.933059	0.936699	1.10402	0.893043	0.680959		1.01422	0.0837047
-4.5	0.928055	0.827406	1.40967	1.4286	1.05289	1.11368	1.03821	1.06809	1.55203	0.830254		1.12489	0.0850477		t=0.5719, df=9, p=0.5814, n=10
-3	0.851839	0.826365	1.36034	1.43099	1.22923	1.29429	1.00784	1.03216	0.635426	0.97955		1.0648	0.0860149
-1.5	1.05077	0.826365	0.733849	0.565203	1.16727	1.27335	1.00784	0.890598	0.635426	0.973548		0.912423	0.0757072
--	0	0	0	0	0	0	0	0	0	0		0	0
--	0	0	0	0	0	0	0	0	0	0		0	0
--	0	0	0	0	0	0	0	0	0	0		0	0
1.5	1.13607	0.7015	1.01235	0.775209	1.13372	1.26012	0.985773	1.10765	1.08438	1.23918		1.04359	0.0609551
3	1.13607	0.988641	0.780892	0.713646	1.13372	1.26012	0.84687	0.895659	1.36763	1.13376		1.0257	0.0715754
4.5	1.13786	0.973496	1.18422	0.652083	0.965841	1.28596	0.856137	0.889121	1.62782	1.74155		1.13141	0.114503
6	1.18381	0.892323	1.05926	0.807252	1.01002	0.923755	1.00597	0.882584	1.88801	1.82293		1.14759	0.129278
7.5	1.09441	0.686423	0.934299	0.962421	0.911432	0.87668	0.902653	1.03758	1.86599	1.90431		1.11762	0.1395
9	1.00501	0.72734	0.744477	0.786671	0.812847	0.829604	0.914626	0.996139	0.99497	1.49091		0.930259	0.0744453
10.5	0.922967	0.768256	0.812419	0.840735	0.713076	0.736764	0.9266	0.954698	1.8615	1.0775		0.961452	0.111808
12	1.17304	0.923814	0.880361	0.894799	0.613304	0.796143	1.05546	0.992983	1.69009	1.13683		1.01568	0.0960859
13.5	0.998776	1.07937	0.764932	0.741925	0.72113	0.855522	0.82828	1.03127	1.51868	1.19615		0.973603	0.0829848
15	0.824513	0.835409	0.742298	0.706856	0.828957	1.06712	0.900593	0.845673	1.32722	1.42464		0.950328	0.0816808
16.5	1.19575	0.974759	0.719664	0.671788	0.671173	0.874017	0.972907	1.08459	1.13576	1.65314		0.995354	0.0995023
18	1.22946	1.11411	0.745383	0.761174	0.606051	0.839994	0.875751	0.917321	1.33675	1.09304		0.951903	0.0777407
19.5	1.01496	0.873879	0.771102	0.887167	0.795517	0.805971	0.778595	0.750052	1.53773	1.22272		0.943769	0.084572
21	1.00992	0.961356	1.04938	1.18209	0.93816	0.786081	0.914501	0.949119	1.31614	1.05583		1.01626	0.0493278
22.5	1.00489	1.08255	0.973238	1.03284	0.965273	0.912428	0.875453	0.877853	1.24752	2.05723		1.10293	0.117642
24	0.939575	0.671471	0.897094	0.883578	0.992386	1.03878	0.836404	0.806586	1.17891	1.83494		1.00797	0.107149
25.5	0.874263	0.82578	0.867501	0.800724	1.04338	1.14796	0.944539	0.859001	1.4301	1.39364		1.01869	0.0775081
27	0.797773	0.684057	0.837909	0.71787	0.785992	0.805995	1.07008	1.15323	1.2554	1.98071		1.0089	0.130745
28.5	0.961142	0.952476	0.804548	0.810247	0.816981	1.00386	0.91071	1.01701	1.5696	1.78315		1.06297	0.112099
30	1.12451	1.10247	0.79928	0.867321	1.02159	1.14297	0.869951	1.00886	1.88381	1.5856		1.14064	0.113749
31.5	1.19191	0.934191	0.794013	0.924394	0.970457	1.28209	0.857679	0.742679	1.75006	1.98503		1.14325	0.139836
33	1.25931	0.765913	0.980779	1.06741	0.919321	0.927193	0.845406	1.01121	1.61632	1.60321		1.09961	0.0998322
34.5	1.1196	0.834005	1.16755	1.21042	1.14914	1.34027	0.869092	0.916876	1.12453	1.22139		1.09529	0.0555559
36	0.979901	0.902098	1.22289	1.28037	1.18646	1.07913	0.892778	0.822541	1.45856	1.54958		1.13743	0.0820826
37.5	1.01139	0.615844	1.05859	1.13813	0.998914	0.868003	0.847768	0.750911	1.51098	1.95405		1.07546	0.130868
39	1.11887	0.799831	0.894285	0.995879	0.639326	0.846703	0.881066	1.13638	1.5634	1.94093		1.08167	0.130894
40.5	1.11662	0.716898	1.2419	1.16684	1.16702	1.27519	0.914364	0.903473	1.07113	1.9278		1.15012	0.107777
42	1.11437	0.959127	1.06669	0.908678	1.09722	1.14155	0.96582	1.0377	1.47436	2.02069		1.17862	0.111521
43.5	0.870999	1.00573	0.891478	0.650516	0.832131	0.85037	1.01728	0.996456	1.87759	2.11357		1.11061	0.160606
45	0.974268	1.05234	0.907812	0.945464	0.780713	0.827506	0.928939	0.955217	1.4733	1.62986		1.04754	0.0928228
46.5	1.07754	1.01474	0.919714	0.963838	0.729295	0.804643	0.867314	0.919099	1.71536	1.47779		1.04893	0.103379
48	0.99645	1.01989	1.12271	0.99678	0.891542	1.0501	0.805689	0.775657	1.74889	1.2188		1.06265	0.0921148
49.5	0.915363	1.02504	0.896652	0.961712	0.796017	0.940522	0.865606	0.748716	1.78242	1.20728		1.01393	0.099349
51	1.14121	1.06033	0.885868	1.25475	0.700492	0.830942	0.925523	0.797101	1.51574	1.19575		1.03077	0.0832477
52.5	1.18518	1.09562	0.875083	0.849567	0.769691	0.841761	0.880425	0.845486	1.40079	1.43438		1.0178	0.0819572
54	0.85733	0.853652	0.931071	0.978532	0.838889	0.85258	0.835328	0.969196	1.47045	1.76456		1.03516	0.106357
55.5	0.920421	0.916354	0.987059	1.1075	1.05797	1.06165	1.00221	1.07824	1.38712	1.91198		1.14305	0.100325
57	0.983511	0.979057	1.00123	1.0563	0.984077	1.05333	0.978317	1.13469	1.4403	2.0594		1.16702	0.114548
58.5	1.24823	0.932266	1.17958	1.27081	0.910181	1.04501	0.954418	1.11262	1.49348	1.89904		1.20456	0.101226
60	0.936377	0.885475	1.17491	1.23743	0.867946	0.92024	0.739734	1.09055	1.76517	1.88456		1.15024	0.128912
