# Supplementary material for: Heterosynaptic plasticity of the visuo-auditory projection requires cholecystokinin released from entorhinal cortex afferents
Source: eLife. 2024 Mar 4;13:e83356. doi: 10.7554/eLife.83356 (PMC10954309; doi:10.7554/eLife.83356)
Supplement: Figure 2—source data 1. [file elife-83356-fig2-data1.xlsx]

## Sheet: 2E_to_G
	HFS laser EC to AC + Pre/Post Pairing																HFS laser VC to AC + Pre/Post Pairing															HFS laser EC to AC + Pre/Post Pairing				HFS laser VC to AC + Pre/Post Pairing					two-way RM Anova
Time (min)	RecSite1	RecSite2	RecSite3	RecSite4	RecSite5	RecSite6	RecSite7	RecSite8	RecSite9	RecSite10	RecSite11	RecSite12	RecSite13	mean	sem		RecSite1	RecSite2	RecSite3	RecSite4	RecSite5	RecSite6	RecSite7	RecSite8	RecSite9	RecSite10	mean	sem					before	after			before	after
-22.5	1.26053	1.27123	0.908644	0.945434	0.891469	1.2241	0.959766	1.1485	1.12496	0.924713	0.682029	0.373248	0.980221	0.97653	0.07202		1.17049	0.832934	1.0482	1.04546	0.905053	0.938128	1.05428	0.802689	1.0792	1.07586	0.99523	0.03973				RecSite1	0.94	1.13		RecSite1	1.11	1.47			df-time*manipulation	1
-21	0.888911	0.939932	1.1146	1.01134	1.09739	1.10267	1.00257	0.743855	1.14965	0.753754	1.3378	0.739913	1.03877	0.99393	0.05142		0.951699	0.762497	1.09427	1.02686	0.909071	1.0973	1.08056	0.821047	1.12019	1.0899	0.99534	0.04259				RecSite2	0.99	1.25		RecSite2	1.06	0.83			df-error	21
-19.5	1.16076	1.06222	0.930342	1.00066	0.915379	0.988305	1.04538	1.34925	0.763581	1.13202	1.19297	0.660693	1.00759	1.01609	0.05193		0.948459	0.794301	1.11133	1.13189	0.91309	0.993885	0.984293	0.839405	1.03203	1.10394	0.98526	0.03817				RecSite3	1.08	1.51		RecSite3	0.97	0.91			F-time*manipulation	10.49
-18	1.16242	0.951217	0.817765	0.989985	0.878729	0.732217	0.956604	1.16353	0.730656	1.16283	1.04813	1.52944	0.862056	0.99889	0.06334		0.945219	0.736252	1.12838	1.23692	1.09026	0.890467	0.88803	0.911591	0.943865	1.01177	0.97828	0.04769				RecSite4	1	1.04		RecSite4	0.89	1.23			p	0.004
-16.5	1.16407	1.16354	0.705188	1.02328	0.842078	0.753642	1.02164	0.977807	0.697732	1.24572	1.05785	1.02356	0.716519	0.95328	0.05498		1.07092	0.823894	1.00184	0.863027	0.899075	0.999039	0.867199	0.983778	0.848457	0.984727	0.93419	0.02784				RecSite5	1.03	1.22		RecSite5	1	0.83
-15	1.14244	1.0646	0.982316	1.02453	0.949437	0.775066	1.08667	0.818955	1.09274	1.0503	1.10976	0.517679	1.11148	0.97892	0.05146		1.19661	0.911535	1.06271	0.750573	0.900455	1.10761	0.846368	1.08477	0.825238	0.928845	0.96147	0.04788				RecSite6	0.98	1.2		RecSite6	1.04	0.86			Bonferroni comparison
-13.5	0.712001	0.965657	1.21824	1.02578	0.920413	0.815089	0.957581	1.17304	0.948858	0.854691	1.16167	1.4846	1.06807	1.02351	0.05814		1.17734	1.14487	0.90931	0.693755	0.901835	0.912002	1.08214	0.860592	1.01282	0.872963	0.95676	0.04914				RecSite7	1	1.13		RecSite7	0.94	0.87			HFS laser EC to AC + Pre/Post Pairing before vs after	p<0.001
-12	0.874036	1.18075	1.20704	0.981463	0.891389	0.834111	0.996954	1.07023	0.804973	0.868057	1.07947	0.771447	1.02466	0.96804	0.0406		1.15806	1.10885	0.942782	0.664756	0.998012	1.01736	1.02675	1.10099	0.984659	1.0685	1.00707	0.04556				RecSite8	0.89	1.34		RecSite8	1.02	0.84			HFS laser VC to AC + Pre/Post Pairing before vs after	p=0.623
-10.5	0.802418	0.801983	1.19583	0.998419	1.06932	1.20293	0.93016	0.96743	1.01271	0.881424	1.13135	1.37402	1.11074	1.03683	0.0482		1.14885	1.07284	0.976255	0.974927	1.09419	1.12271	0.971362	1.284	0.956495	1.03744	1.06391	0.03452				RecSite9	0.99	1.29		RecSite9	0.99	0.99			HFS laser EC to AC + Pre/Post Pairing before vs HFS laser VC to AC + Pre/Post Pairing before	p=0.976
-9	0.7308	0.787085	0.937511	1.01537	0.880812	0.832305	0.973182	0.819809	1.22046	1.10377	1.07967	1.50111	1.19681	1.00605	0.06194		1.13963	1.0815	0.902759	0.932309	0.953764	1.22362	0.775641	1.15035	1.09723	1.11351	1.03703	0.04633				RecSite10	0.95	1.01		RecSite10	0.96	0.89			HFS laser EC to AC + Pre/Post Pairing after vs HFS laser VC to AC + Pre/Post Pairing after	p=0.005
-7.5	0.738656	0.772186	0.827839	1.0254	1.0168	1.23054	1.0162	0.672189	1.19313	0.977342	1.11148	1.65391	0.855576	1.00702	0.07499		1.231	1.09017	0.978565	0.88969	0.999349	0.96125	0.837933	1.01671	1.05968	1.14869	1.0213	0.03902				RecSite11	1.04	1.2
-6	0.843061	1.15148	0.772369	0.952751	1.1528	0.719226	1.00967	1.09444	0.882017	0.705188	1.14329	1.56711	0.888219	0.99089	0.06807		1.32236	1.10895	1.05437	1.08562	1.04493	0.933221	0.900225	1.00137	1.02212	1.00798	1.04812	0.03848				RecSite12	1.06	1.34
-4.5	0.964299	1.12001	1.33171	0.976298	1.13516	0.984085	1.00549	0.769163	1.13329	0.930963	0.879102	0.457463	1.12886	0.98584	0.06144		1.07993	1.12773	0.997599	1.09054	1.09341	0.905192	0.950811	0.986024	1.00363	0.867279	1.01022	0.02894				RecSite13	1.05	1.03								mean	std	n	sem
-3	1.31983	1.24904	1.36985	0.999844	1.11751	1.22594	1.00131	0.748108	0.820716	1.15674	0.692785	0.62243	1.07565	1.03075	0.07054		0.837501	1.03238	0.940827	1.09546	1.03335	1.1115	1.0014	0.863683	0.985149	0.788133	0.96894	0.03646													HFS laser EC to AC + Pre/Post Pairing before	0.998577	0.0533773	13	0.0148042
-1.5	1.31983	0.759836	0.978076	0.999844	1.11751	1.13898	1.00131	0.727053	0.820716	0.943294	0.992865	0.630338	1.02245	0.95785	0.05385		0.837501	0.937031	0.940827	0.744848	0.973286	1.1115	1.0014	0.863683	0.985149	0.788133	0.91834	0.0367													HFS laser VC to AC + Pre/Post Pairing before	0.99931	0.0634864	10	0.0200762
--	0	0	0	0	0	0	0	0	0	0	0	0	0	--	--		0	0	0	0	0	0	0	0	0	0	--	--
--	0	0	0	0	0	0	0	0	0	0	0	0	0	--	--		0	0	0	0	0	0	0	0	0	0	--	--													HFS laser EC to AC + Pre/Post Pairing after	1.20683	0.143271	13	0.0397363
--	0	0	0	0	0	0	0	0	0	0	0	0	0	--	--		0	0	0	0	0	0	0	0	0	0	--	--													HFS laser VC to AC + Pre/Post Pairing after	0.97207	0.21225	10	0.0671195
1.5	1.34334	1.07751	1.19087	0.963179	1.08936	0.967631	1.00111	1.16032	1.55183	1.2406	1.33075	1.22565	1.20642	1.18066	0.04841		1.85304	0.733574	0.757104	0.486496	0.0757386	0.822932	0.837219	1.07049	0.933859	0.951146	0.85216	0.15017
3	1.37066	1.13655	1.39571	1.00286	1.17459	0.967631	1.0175	0.820159	1.34573	1.13553	0.732548	1.22565	1.20642	1.11781	0.05889		1.85304	0.564995	0.573858	0.753017	-0.0526889	0.689508	0.806049	1.04729	0.933859	1.0745	0.82434	0.16122
4.5	1.05673	1.1956	1.47048	0.897963	1.34781	1.11659	1.0339	1.56791	1.13962	1.03046	1.25006	1.30039	0.959696	1.18209	0.05745		1.41616	0.507114	0.342531	1.01954	-0.111175	0.676506	0.77488	1.01557	1.01757	1.1262	0.77849	0.1476
6	0.913883	1.17446	1.66039	1.11619	1.20051	1.41452	1.17656	1.55763	0.983382	1.25303	0.932484	1.37513	0.712968	1.19009	0.07745		0.979276	0.504581	0.363328	1.46205	-0.0252108	0.663505	0.749185	0.983847	1.10129	1.14206	0.79239	0.14451
7.5	0.856587	1.15332	1.54444	1.08642	1.05321	1.17881	1.24024	1.54735	1.02208	1.35746	0.633836	1.44286	0.735812	1.14249	0.08352		0.974554	0.62024	0.510188	0.958914	0.187719	0.865618	0.723491	0.949829	1.01143	1.15252	0.79545	0.09612
9	0.799291	1.12056	1.42849	0.983646	1.07389	1.36492	1.2094	1.45671	1.06078	1.07119	0.870101	0.9455	0.758657	1.08793	0.06541		0.969832	0.735899	0.657048	0.968069	0.46413	0.765101	0.902435	1.07509	0.921567	1.12884	0.8588	0.0676
10.5	1.07631	1.08431	1.00668	0.914525	1.09457	0.961626	1.17857	0.842605	1.1375	0.784917	1.10637	1.06923	0.87098	1.00986	0.03575		1.61073	0.719439	0.637279	0.977225	0.740542	0.664584	0.920456	1.164	1.12379	1.10516	0.96632	0.10012
12	0.957121	1.10242	1.08027	1.13962	1.30628	1.31802	1.18541	0.961938	1.18707	0.873498	1.09654	1.16996	0.983303	1.10473	0.03872		1.22837	0.536001	0.711815	1.32297	1.00033	0.831924	0.938477	1.17906	1.28762	1.12549	1.0162	0.08712
13.5	0.874252	1.12054	1.13478	1.14965	1.169	1.34739	1.19225	1.08127	1.23665	0.999109	1.08672	1.10676	1.15568	1.12723	0.03253		1.06859	0.393094	0.786351	1.26708	1.0593	0.90176	0.867262	1.12933	1.39713	1.13993	1.00098	0.09394
15	1.14256	1.10936	1.04213	1.15929	1.03173	1.30195	1.04984	0.974978	1.24722	0.940036	0.965919	1.47567	0.898874	1.10304	0.04707		0.908818	0.281433	0.955191	1.2112	1.11827	0.971595	0.796048	1.04722	1.29514	1.06894	0.96539	0.09361
16.5	0.870849	1.19468	1.01827	0.997525	0.859543	1.25651	1.04971	0.868685	1.25779	1.04666	1.16649	1.58883	1.15109	1.10205	0.05837		1.01851	0.480287	0.959332	0.753688	0.951732	0.804021	0.755905	0.965107	1.08741	0.997943	0.87739	0.06
18	1.00973	1.27999	0.994414	1.04943	0.863401	1.14525	1.04957	0.829363	1.12764	1.16743	0.812531	1.57222	1.4033	1.10033	0.06406		1.60544	0.679141	0.963473	0.664757	0.785197	0.836887	0.715761	0.853473	0.879674	0.919521	0.89033	0.09019
19.5	1.14862	1.10682	1.40381	1.10134	0.867259	1.03399	1.11238	1.20653	1.46079	1.34227	0.993604	1.5556	1.21641	1.19611	0.05689		1.98506	0.627436	0.708341	0.738399	1.06887	0.869753	0.817803	0.74184	0.821251	0.874835	0.92536	0.13034
21	1.08864	1.26464	1.81321	1.14814	1.04716	1.15258	0.957668	1.44734	0.960862	1.07071	0.710956	0.981006	1.11568	1.13528	0.07703		1.9335	0.575731	0.774342	0.812041	1.0044	0.951686	0.919845	0.657155	0.762829	0.911205	0.93027	0.12568
22.5	1.02865	1.16474	1.28472	1.13915	1.1319	1.1376	1.08254	1.33479	1.265	1.30791	1.48249	0.971741	1.35822	1.20688	0.04201		1.88194	0.508796	0.840343	0.69903	0.93992	1.03052	0.735454	0.740766	1.14621	0.947575	0.94706	0.12536
24	1.0383	1.16209	1.38799	1.13016	1.15536	1.12262	1.1878	1.22225	0.976569	0.962633	0.702431	0.962476	1.30265	1.10102	0.05068		1.39919	0.542898	0.833501	0.61904	0.813626	1.04726	0.819655	0.824377	1.17546	1.06205	0.91371	0.08618
25.5	1.18048	1.15944	1.49125	0.986595	1.17881	1.27392	1.2122	1.05645	1.39985	0.812592	1.07535	1.43265	1.24707	1.19282	0.05403		1.47576	0.577	1.05684	0.85774	0.687332	1.03294	0.903856	0.801009	1.16929	1.1168	0.96786	0.08667
27	1.16904	1.08878	1.10489	0.919267	1.20662	1.42521	1.23661	0.890648	1.43683	0.877642	1.44827	1.15476	1.19121	1.16537	0.05634		1.55233	0.712139	1.12723	1.09644	0.945839	0.932846	0.884998	0.77764	1.16313	1.06677	1.02594	0.07918
28.5	1.13781	1.12264	1.74119	1.15941	1.17273	1.40428	1.06934	0.777043	1.47382	0.942692	0.985147	1.48046	1.13535	1.20015	0.07514		1.03032	0.811997	0.933551	1.41958	0.984665	0.832748	0.866139	0.774399	0.890094	1.01674	0.95602	0.06154
30	1.16557	1.13714	1.40946	1.02577	1.13884	1.2563	0.902062	1.07088	1.39576	1.22283	1.17019	1.41745	0.84116	1.16565	0.05219		0.768636	0.720783	0.739876	0.97271	1.02349	0.668962	0.870501	0.771158	0.723519	0.861937	0.81216	0.03878
31.5	1.19566	1.32083	1.37121	1.17249	0.998965	1.16333	0.941675	1.36472	1.35758	0.896587	1.15191	1.35443	0.769238	1.15836	0.05812		0.637112	0.669408	1.10129	1.10629	0.842636	0.903529	0.874862	0.832777	0.623998	1.00002	0.85919	0.05914
33	1.04978	1.26161	1.53611	1.14099	1.05726	1.07037	0.981287	1.07003	1.31939	1.39407	1.13364	1.11601	0.697317	1.1406	0.0598		1.31413	1.14262	0.90726	1.23987	0.920567	0.878675	0.704617	0.894396	0.761002	0.874364	0.96375	0.06707
34.5	0.903905	1.20278	1.55226	0.931878	0.99242	1.08724	1.09003	0.775347	1.20121	1.35756	0.802057	1.46331	0.700601	1.08159	0.0769		1.21254	0.9254	0.71323	1.40554	0.998498	0.853821	0.893035	0.808676	0.898006	0.855475	0.95642	0.06842
36	0.932745	1.18599	1.18447	1.0547	1.17213	1.10411	1.19877	1.20783	1.08302	1.1289	0.989551	1.26034	1.31159	1.13955	0.03058		1.11095	0.708183	0.824893	1.06741	1.13864	0.875619	0.956689	0.722956	0.774657	0.846471	0.90265	0.05277
37.5	1.10317	1.1692	1.20348	1.05694	1.2437	1.19394	0.997111	1.24831	1.29667	0.900247	1.17704	1.05737	1.32576	1.15177	0.03554		0.607147	0.879805	0.789683	0.729269	1.09713	0.897416	0.957961	0.973163	0.714152	0.889128	0.85349	0.04819
39	1.27359	1.28561	1.22248	0.953203	1.25071	1.21319	1.17306	1.28878	1.31359	1.29892	0.669719	1.20708	1.33994	1.19153	0.05324		0.498734	1.05143	0.707009	0.866006	1.05563	0.832849	0.959233	0.732634	0.68507	0.931786	0.83204	0.05917
40.5	0.999577	1.20179	1.62827	0.9491	0.872423	1.1319	1.03287	0.937251	1.33052	1.30342	0.936408	1.41393	0.909367	1.12668	0.06734		0.588015	0.869751	0.624336	1.42021	0.907734	0.768281	0.842323	1.00208	0.78758	1.04668	0.8857	0.0792
42	1.11175	1.21417	1.64685	0.944997	0.936875	1.05061	1.00037	1.42358	1.17524	1.00283	1.34296	1.17094	1.09532	1.16281	0.05939		0.830255	0.856644	0.871815	1.06248	0.834717	0.825052	0.725412	0.791848	0.89009	1.10813	0.87965	0.03933
43.5	1.22392	1.23846	1.66544	0.90184	1.00133	1.29106	0.967871	0.947451	1.01995	1.03994	1.40672	1.24988	1.03107	1.15269	0.06323		1.07249	0.873044	1.05132	0.971702	0.7617	0.881823	0.845643	0.702464	1.01397	1.12376	0.92979	0.04637
45	1.00953	1.26274	1.39956	0.912807	0.998738	1.30491	1.1457	1.2379	1.28011	1.07706	1.47049	1.32883	0.966829	1.18425	0.05143		1.46769	0.889443	1.02249	0.880919	0.919158	0.758958	0.738303	0.882907	1.13785	1.11646	0.98142	0.07214
46.5	0.795144	1.22729	1.45716	0.923775	1.07447	1.31875	1.19792	1.52835	1.10914	0.868888	1.43157	1.33844	0.884147	1.16577	0.07071		1.43413	0.541707	0.99367	1.43815	0.749176	0.822556	0.799075	0.983817	0.939049	1.10916	0.98105	0.09543
48	1.352	1.30919	1.51477	0.888223	1.15019	1.321	1.25014	1.36197	1.42047	0.902223	1.19642	1.34804	1.09586	1.23927	0.05447		1.40057	0.624164	0.756521	1.38969	0.579195	0.886153	0.859846	0.96935	0.985698	0.9487	0.93999	0.09232
49.5	1.02151	1.30561	1.2919	0.973409	1.27605	1.30822	1.1678	1.1956	1.347	0.935558	0.909491	1.17176	1.31583	1.17075	0.04567		1.42308	0.706621	0.839845	1.34124	0.916573	0.898522	0.916021	0.954884	1.03235	0.845139	0.98743	0.07511
51	1.18273	1.30203	1.60955	1.05859	1.34089	1.03974	1.10662	1.21824	1.27354	1.39894	1.28053	1.34398	1.21916	1.25958	0.04405		1.44558	1.04318	0.923169	0.913085	0.946682	0.91089	0.972195	0.825042	1.13526	0.732199	0.98473	0.06514
52.5	1.1717	1.23835	1.5871	1.1164	1.22835	1.27217	0.954009	1.32961	1.2656	1.10608	1.25809	1.19065	1.12249	1.21851	0.04254		1.26167	1.12319	1.00742	1.43817	0.976792	0.70641	0.820487	0.724091	1.18122	0.70717	0.99466	0.08528
54	0.940359	1.22756	1.56466	1.05011	1.11581	1.30439	0.943292	1.44065	1.25767	1.29089	1.23566	1.31734	0.929212	1.20135	0.05685		1.07776	1.01289	1.09168	1.40608	0.627918	0.798369	0.859203	0.631189	0.898943	0.772398	0.91764	0.07924
55.5	0.990252	1.21678	1.3597	1.05315	1.27343	1.33662	1.03137	1.27954	1.01998	1.0769	0.819737	1.44404	0.735932	1.12596	0.06157		1.43623	0.902593	0.975722	1.374	0.76038	0.890328	0.897919	0.679446	1.00618	0.882755	0.98055	0.08111
57	1.04015	1.11967	1.47963	1.0562	1.29153	1.16865	1.16163	1.11844	1.27451	0.862914	1.45971	1.43886	1.25809	1.21	0.05232		1.87502	0.813823	0.883169	0.784741	0.892842	0.890477	0.767656	0.727702	1.11341	0.993111	0.97419	0.11212
58.5	1.37127	1.22888	1.59955	1.15233	1.30964	0.97104	1.20299	1.40414	1.52904	0.839869	1.16169	1.42109	0.992612	1.24493	0.06473		1.74491	0.725052	0.848192	0.984885	0.89674	0.890626	0.862455	0.917118	0.778178	0.911857	0.956	0.09557
60	1.395	1.33808	1.61331	1.1427	1.18822	0.974526	1.24434	1.48716	1.42421	0.816825	1.26441	1.40332	0.727137	1.23225	0.07543		1.61479	0.83172	0.813214	1.18503	0.934705	0.888726	0.957253	0.989743	0.864	0.965487	1.00447	0.07962

## Sheet: 2H_to_J
	HFS laser EC to AC + Pre/Post Pairing											HFS laser VC to AC + Pre/Post Pairing															HFS laser EC to AC + Pre/Post Pairing				HFS laser VC to AC + Pre/Post Pairing					two-way RM Anova
Time (min)	RecSite1	RecSite2	RecSite3	RecSite4	RecSite5	RecSite6	RecSite7	RecSite8	mean	sem		RecSite1	RecSite2	RecSite3	RecSite4	RecSite5	RecSite6	RecSite7	RecSite8	RecSite9	RecSite10	mean	sem					before	after			before	after
-22.5	1.09254	0.915749	1.17065	0.996207	0.991415	1.49349	0.976476	1.11124	1.09347	0.06873		0.945353	1.07348	1.04018	1.04588	0.863192	0.871742	1.03998	1.0249	1.01198	1.01603	0.99327	0.02471				RecSite1	0.99	1.32		RecSite1	1	0.99			df-time*manipulation	1
-21	1.05449	0.931128	1.28456	0.988671	0.98878	1.20559	0.976119	1.18707	1.07705	0.04934		0.918052	1.07832	0.995686	1.04904	0.881001	0.898447	0.976163	1.0405	0.957457	0.983553	0.97782	0.02198				RecSite2	1.04	1.42		RecSite2	1	1			df-error	16
-19.5	1.01644	0.946507	1.05728	0.964062	0.986145	0.91768	0.914685	1.22399	1.00335	0.03834		0.936291	0.993304	0.951192	0.992903	0.89881	0.925152	0.961055	0.969869	0.994462	0.994834	0.96179	0.01125				RecSite3	0.98	1.65		RecSite3	1.02	1.06			F-time*manipulation	9.711
-18	0.929268	0.902694	0.830001	0.966746	0.993472	0.695379	0.947099	1.14812	0.9266	0.04927		0.95453	0.999897	1.03041	0.963759	1.08019	1.06295	0.945946	1.02211	1.03147	1.00611	1.00974	0.01499				RecSite4	1.01	1.1		RecSite4	1.03	1.11			p	0.007
-16.5	0.897806	0.889003	0.717164	0.96943	1.0008	0.778276	0.979512	1.07225	0.91303	0.04472		1.00237	1.00649	0.973063	0.934614	1.16114	1.05818	0.979549	0.936149	1.03645	1.02856	1.01166	0.02213				RecSite5	1	1.13		RecSite5	1.04	1.11
-15	0.886614	0.875312	0.700661	0.999408	0.898489	0.861173	1.01224	0.859412	0.88666	0.03635		1.05021	1.0156	0.995152	1.05107	1.19187	1.05341	1.055	1.00005	1.04143	0.999802	1.04536	0.019				RecSite6	0.95	2.37		RecSite6	1.04	1			Bonferroni comparison
-13.5	0.885556	0.891743	0.732325	0.972883	0.851471	0.939942	1.04497	1.12368	0.93032	0.04548		0.969702	1.05009	1.01724	1.01054	1.07345	0.958638	1.03351	1.06395	0.960216	0.971047	1.01084	0.01466				RecSite7	1.06	1.36		RecSite7	1.01	1.03			HFS laser EC to AC + Pre/Post Pairing before vs after	p=0.001
-12	0.94564	0.910008	0.76399	1.01215	0.953833	1.01871	1.11558	0.925935	0.95573	0.03848		0.972667	0.970447	0.963463	0.970004	0.955032	0.918851	1.01202	0.956608	0.957628	0.97019	0.96469	0.00762				RecSite8	1.01	1.11		RecSite8	1.03	0.9			HFS laser VC to AC + Pre/Post Pairing before vs after	p=0.898
-10.5	1.00572	1.1042	0.996128	1.02099	1.05619	1.01957	1.05747	1.13522	1.04944	0.01858		0.975632	0.982611	0.939275	0.981086	0.924604	0.879064	0.975525	0.913248	0.95504	0.969333	0.94954	0.01159								RecSite9	1.01	0.91			HFS laser EC to AC + Pre/Post Pairing before vs HFS laser VC to AC + Pre/Post Pairing before	p=0.308
-9	1.04004	1.05334	1.22827	1.02983	1.07661	1.02044	0.99936	1.09346	1.06767	0.02704		1.05307	0.994775	0.929882	0.992168	0.894175	1.07428	0.939027	0.969474	1.03108	1.00458	0.98825	0.01885								RecSite10	0.99	0.94			HFS laser EC to AC + Pre/Post Pairing after vs HFS laser VC to AC + Pre/Post Pairing after	p=0.006
-7.5	1.07436	1.00248	1.23861	1.00823	1.09702	1.19878	1.08562	1.0517	1.0946	0.0319		1.06654	0.999023	1.01216	0.934693	0.867613	1.09021	1.05599	1.0257	1.04143	1.03982	1.01332	0.02217
-6	1.07211	1.05657	1.24894	1.00949	0.964479	1.37712	1.13036	0.90413	1.0954	0.05844		1.07362	1.00327	1.06256	1.04414	0.841051	1.10613	0.962963	1.08064	1.04508	1.03208	1.02515	0.02544														mean	std	n	sem
-4.5	1.06986	1.14646	1.14616	1.01075	1.11039	0.649095	1.09647	0.95481	1.023	0.06231		1.00588	0.993043	1.0822	1.09407	1.12102	1.0654	0.991578	1.10459	1.03195	1.0028	1.04925	0.01663													HFS laser EC to AC + Pre/Post Pairing before	1.00396	0.0344304	8	0.012173
-3	0.974034	1.1914	0.817118	1.02249	1.03546	0.687396	1.06257	1.00549	0.9745	0.05872		0.938126	0.982815	1.08646	1.11903	1.26101	1.1375	1.02019	1.08964	1.01882	0.973512	1.06271	0.03201													HFS laser VC to AC + Pre/Post Pairing before	1.01704	0.0172955	10	0.00546931
-1.5	0.974034	1.1914	0.897506	1.02249	0.960529	0.696291	0.950051	1.00549	0.96222	0.05214		0.938126	0.982815	1.08646	1.11903	1.26101	1.1375	1.02019	1.07468	1.01882	0.973512	1.06121	0.03189
--	0	0	0	0	0	0	0	0	--	--		0	0	0	0	0	0	0	0	0	0	--	--													HFS laser EC to AC + Pre/Post Pairing after	1.43239	0.421755	8	0.149113
--	0	0	0	0	0	0	0	0	--	--		0	0	0	0	0	0	0	0	0	0	--	--													HFS laser VC to AC + Pre/Post Pairing after	1.00478	0.0729066	10	0.0230551
--	0	0	0	0	0	0	0	0	--	--		0	0	0	0	0	0	0	0	0	0	--	--
1.5	1.45164	1.13007	0.730882	1.1092	1.00853	1.44732	1.29846	0.978842	1.14437	0.09348		1.09317	1.04018	1.11946	1.07418	0.949121	0.848043	1.05886	0.749072	0.852496	0.991773	0.97763	0.04143
3	1.35671	1.24073	0.749252	1.1092	1.03262	1.91206	1.26406	1.04929	1.21424	0.12761		1.09085	1.08417	1.11946	1.07418	1.01129	0.848043	1.05886	0.770143	0.852496	0.993741	0.99032	0.0409
4.5	1.26178	1.35138	0.812601	1.06172	1.0567	2.37681	1.22965	1.1382	1.28611	0.17767		1.08738	1.07162	1.07935	1.10021	1.07346	1.0433	0.992859	0.822821	0.88434	0.996692	1.0152	0.03121
6	1.29711	1.33081	0.988416	1.01425	1.11318	2.73939	1.20099	1.19839	1.36032	0.21559		0.994424	1.05907	1.08548	1.12624	1.12368	1.09987	0.926854	0.875499	0.916184	0.964075	1.01714	0.03108
7.5	1.33244	1.31023	1.16423	1.06483	1.16966	2.72236	1.2272	1.25053	1.40518	0.20375		0.901467	1.07108	1.07832	1.12446	1.04487	1.08091	0.964052	0.87433	0.884566	0.931458	0.99555	0.0314
9	1.21291	1.34036	1.45251	1.06617	1.16378	2.70534	1.25341	1.07735	1.40898	0.20391		0.883506	1.08309	1.07116	1.12268	1.00911	1.06194	1.00125	0.888254	0.852949	0.942313	0.99163	0.03167
10.5	1.15896	1.37049	1.2178	0.996249	1.05048	2.18666	1.2128	1.01926	1.27659	0.14669		0.9334	1.03919	1.10657	1.04599	0.994884	1.09162	0.998675	0.913071	0.879485	0.953169	0.99561	0.02532
12	1.16724	1.3352	1.13371	0.940538	1.04923	1.66799	1.23233	0.961171	1.18593	0.08914		0.983294	0.995296	1.07908	1.0319	0.980657	1.06338	0.9961	0.937889	0.906022	0.947356	0.9921	0.01819
13.5	1.20664	1.29992	1.40275	0.933692	1.04798	1.62627	1.25186	1.01817	1.22341	0.0855		0.950984	1.00503	1.0516	1.03935	0.966946	1.03514	0.932668	0.884635	0.858369	0.941544	0.96663	0.02198
15	1.24604	1.45662	1.67179	0.95128	1.15879	1.65911	1.20782	1.03867	1.29876	0.10232		0.918675	1.01477	1.07616	1.04681	0.979691	0.91854	0.907121	0.831382	0.852377	0.923354	0.94689	0.02685
16.5	1.21669	1.29522	1.74201	1.02285	1.09296	1.69194	1.21177	1.05916	1.29157	0.10506		0.970431	1.04867	1.10072	1.16199	0.992436	0.849582	0.881362	0.885449	0.846385	0.902908	0.96399	0.03678
18	1.28002	1.23999	1.81223	1.09442	1.02713	2.42863	1.21572	1.00595	1.38801	0.18563		1.01389	1.08257	1.11129	1.15883	1.03164	0.880001	0.909567	0.908724	0.882054	0.940765	0.99193	0.03394
19.5	1.34336	1.18476	1.55179	1.02608	1.05796	2.61347	1.19094	0.913806	1.36027	0.2055		1.05735	1.05281	1.10608	1.15566	1.00261	0.91042	0.937772	0.931998	0.946755	0.978621	1.00801	0.02738
21	1.37972	1.2357	1.29136	1.09695	1.09109	2.79831	1.2523	0.885903	1.37892	0.22426		1.0252	1.03073	1.10088	1.11035	0.975048	1.0068	1.01994	0.968454	0.894537	0.977398	1.01093	0.02121
22.5	1.41607	1.30881	1.63448	1.16782	1.12421	2.4313	1.31365	0.890122	1.41081	0.17633		0.993052	1.00865	1.09329	1.16468	0.948216	1.01529	1.02863	0.911691	0.842319	0.976175	0.9982	0.03
24	1.35657	1.38193	1.29067	1.1173	1.07642	1.73951	1.43138	0.929928	1.29046	0.09476		0.962828	1.11436	1.0857	1.19279	1.05036	1.02378	1.03732	0.854928	0.832242	0.953898	1.01082	0.03745
25.5	1.29707	1.21985	1.41333	1.06678	1.02864	1.7238	1.36094	0.969733	1.26002	0.09334		0.932605	1.14247	1.02585	1.19797	1.1525	0.877912	1.05733	0.833093	0.839636	0.926183	0.99855	0.04515
27	1.26021	1.39596	1.53599	1.01292	1.0207	1.70809	1.2905	0.995118	1.27744	0.09922		0.923427	1.13178	1.0754	1.1917	1.13931	0.984268	1.07735	0.837503	0.847031	0.968211	1.0176	0.04143
28.5	1.22336	1.21839	1.32642	1.01878	1.01276	1.95577	1.22678	1.0205	1.25035	0.11681		0.914249	1.02768	1.05659	1.11912	1.12613	0.808963	0.988317	0.841913	0.781412	0.927679	0.95921	0.04149
30	1.31059	1.141	1.33294	1.02464	1.02497	2.73026	1.18852	1.06484	1.35222	0.21521		1.0425	1.0058	1.03779	1.04654	1.03879	0.765462	0.934479	0.85418	0.788274	0.915455	0.94293	0.03633
31.5	1.39783	1.13394	1.33945	1.08091	1.03718	2.71016	1.2139	1.02605	1.36743	0.21143		1.04575	0.983917	1.02132	1.05528	1.09499	0.787863	0.950277	0.866447	0.831377	0.917385	0.95546	0.03436
33	1.40623	1.15104	1.65233	1.13717	1.07818	1.889	1.23927	1.05857	1.32647	0.11398		1.049	1.04426	1.00486	1.06402	1.15119	0.841432	0.966074	0.955493	0.87448	0.919315	0.98701	0.03147
34.5	1.41462	1.16814	1.55052	1.17348	1.11918	1.66786	1.44889	1.0911	1.32922	0.08284		0.954997	0.953552	0.990209	1.06876	1.20414	0.895002	0.975821	1.00455	0.895166	0.969741	0.99119	0.03011
36	1.33113	1.38175	1.44872	1.17993	1.15833	1.74672	1.39098	1.13333	1.34636	0.07595		0.958508	1.06446	0.990237	1.07351	1.15285	0.979739	0.985567	1.01583	0.915852	0.938224	1.00748	0.02382
37.5	1.29416	1.22311	1.74606	1.13212	1.19747	1.82558	1.33307	1.17557	1.36589	0.10119		0.962019	0.953176	1.01647	1.08251	1.10157	1.1009	1.03864	1.00823	0.943566	0.949579	1.01567	0.02109
39	1.27594	1.4984	1.7916	1.08431	1.14395	2.08654	1.41365	1.01017	1.41307	0.14039		0.868469	0.904819	1.04271	1.09152	1.00892	1.13456	1.09172	0.984955	0.95905	0.960934	1.00477	0.02862
40.5	1.25773	1.32495	1.83714	1.01019	1.09044	2.34749	1.37064	1.10923	1.41848	0.17174		0.826752	0.910638	0.990741	1.09687	1.06753	1.12957	1.04437	0.961681	0.96842	0.952304	0.99489	0.03048
42	1.31749	1.42697	1.63088	0.997601	1.21644	2.87566	1.32763	1.20828	1.50012	0.22112		0.857273	0.943545	0.966785	1.10223	1.12613	1.02796	0.997029	0.922732	0.94409	0.943675	0.98314	0.0275
43.5	1.39859	1.5191	1.70249	0.999596	1.09664	3.20282	1.37707	0.990321	1.53583	0.27214		0.923913	0.976451	0.968356	1.06466	1.06599	0.926347	0.949202	0.924656	0.919759	0.918826	0.96382	0.01908
45	1.41021	1.70755	1.77409	1.00159	1.2206	3.34652	1.42652	0.968859	1.60699	0.28779		0.990553	0.992461	0.982691	1.0456	1.00584	1.04771	0.938723	0.92658	0.861729	0.906437	0.96983	0.02011
46.5	1.39981	1.70501	1.64654	1.02361	1.21477	3.35701	1.43118	1.05825	1.60452	0.28366		1.05786	1.00847	0.997026	1.09414	1.0766	1.04891	0.928244	0.8994	0.852213	0.955537	0.99184	0.02698
48	1.38941	1.60697	1.519	1.01635	1.20894	2.89448	1.31598	1.14764	1.51235	0.22333		0.998081	1.0193	1.06945	1.14268	1.14736	1.05011	1.05971	0.87222	0.943743	0.944752	1.02474	0.02935
49.5	1.35699	1.57828	1.81253	1.00909	1.07454	2.43195	1.20077	1.06161	1.44072	0.18452		0.938304	1.03013	1.07615	1.13213	1.1469	0.982099	1.05016	0.934215	0.922519	0.933966	1.01466	0.02831
51	1.30007	1.47207	1.9081	1.09669	1.08672	1.93797	1.27491	1.09156	1.39601	0.13275		0.953218	0.98936	1.08285	1.12159	1.14644	0.95064	1.04061	0.968654	0.938004	0.964679	1.0156	0.02561
52.5	1.24315	1.36586	1.50783	1.08269	1.0989	1.93206	1.34906	1.12151	1.33763	0.10699		0.968132	0.94859	1.02382	1.05729	1.06787	0.91918	1.02536	0.945823	0.953489	0.964652	0.98742	0.01723
54	1.35554	1.18212	1.60529	1.11144	1.03941	1.92616	1.33244	1.25318	1.3507	0.10958		0.956387	0.934787	1.00167	1.06563	1.05762	1.08706	1.01012	0.922993	0.917301	0.964624	0.99182	0.02073
55.5	1.29056	1.30193	1.70275	1.14018	1.0748	2.40832	1.31583	1.18751	1.42774	0.16594		0.944641	1.02377	1.05152	1.07397	1.04737	1.07401	1.05574	0.842892	0.870646	0.933857	0.99184	0.02891
57	1.22559	1.22787	1.61388	1.1808	1.1102	1.70262	1.43446	1.12184	1.32716	0.08637		0.998415	1.0223	1.10138	1.15558	1.09071	1.06097	1.06399	0.925925	0.896842	0.911511	1.02276	0.02936
58.5	1.35586	1.32626	1.59992	1.1937	1.18594	2.51341	1.51017	0.955925	1.45515	0.17845		1.05219	1.02084	1.09539	1.13115	1.13405	0.894152	1.07224	0.876906	0.923037	0.91878	1.01187	0.03335
60	1.30826	1.42465	1.58597	1.13727	1.18344	2.562	1.47681	1.09608	1.47181	0.17882		1.02733	0.990864	1.0894	1.10672	1.15448	0.950308	0.96768	0.827887	0.911812	0.926048	0.99525	0.03338

## Sheet: 2K_to_M
	HFS laser VC to AC + Pre/Post Pairing																	HFS laser VC to AC + Pre/Post Pairing					paired T-test
Time (min)	RecSite1	RecSite2	RecSite3	RecSite4	RecSite5	RecSite6	RecSite7	RecSite8	RecSite9	RecSite10	RecSite11	RecSite12	RecSite13	mean	sem				before	after
-22.5	0.980945	1.00461	0.993718	0.979206	1.00458	0.914594	0.938483	1.04122	1.04227	1.00205	0.949383	1.11914	1.01685	0.999	0.01502			RecSite1	1.0072	1.1038			n	13
-21	0.974993	0.998603	0.999279	0.9648	1.0091	0.949951	0.979242	1.106	1.08444	1.0295	0.943421	1.05762	1.02083	1.00906	0.01444			RecSite2	0.9994	1.0461			df	12
-19.5	0.986798	0.995857	0.99563	1.02902	1.01363	1.06533	1.02209	1.19871	1.06955	1.03379	0.979668	1.01551	0.991259	1.03053	0.01668			RecSite3	1.0041	1.0763			t	-1.424
-18	0.998603	0.993111	0.990856	1.04457	0.986901	1.11341	1.06493	1.21957	1.05466	1.03807	1.00824	0.973407	1.01479	1.03855	0.01931			RecSite4	1.0091	0.9863			p	0.18
-16.5	1.00576	1.00299	0.986083	1.06012	0.960177	1.09602	1.03707	1.2045	0.9827	1.03777	1.03681	1.00115	1.02517	1.03356	0.01805			RecSite5	1.0026	0.8141
-15	1.01293	1.00152	1.00862	1.00043	0.924133	1.07862	1.0412	1.06477	0.946852	0.980473	1.02613	1.02889	1.02898	1.01104	0.01238			RecSite6	1.0043	1.0729
-13.5	0.997685	1.00006	0.98385	0.940732	1.00495	0.995744	1.04534	0.925042	0.962914	0.965777	1.05562	0.897433	1.01557	0.9839	0.01305			RecSite7	1.0467	1.0951
-12	0.998868	1.00058	0.978631	1.02782	1.08577	1.05754	1.0541	1.03715	0.978976	0.97238	1.07647	0.971525	1.00215	1.01861	0.01166			RecSite8	0.9583	0.9112
-10.5	1.00005	1.0011	0.983188	1.06149	1.03402	1.05459	1.06286	1.14926	0.947974	0.978983	1.04312	0.929978	0.973025	1.0169	0.01695			RecSite9	0.9448	1.0372
-9	1.00375	1.00142	0.987745	1.08277	0.982268	1.05164	1.08713	0.891187	0.927625	1.00106	1.00977	0.914141	0.968594	0.99301	0.01718			RecSite10	0.9842	1.1127
-7.5	1.00745	1.00174	1.00548	1.02869	1.0014	0.983958	1.07735	0.89755	0.912789	1.02313	1.03114	0.898305	0.977351	0.98818	0.01577			RecSite11	1.027	1.0611
-6	1.01023	0.994168	1.02322	0.974611	1.02053	0.98301	1.06757	0.903913	0.921019	1.00374	1.05251	0.90818	0.986107	0.98837	0.01484			RecSite12	0.9248	1.0305				mean	n	std	sem
-4.5	1.01301	0.994673	1.01629	0.984644	0.968102	0.982062	1.01734	0.958942	0.929248	0.984346	0.942808	0.920958	1.0142	0.97897	0.00959			RecSite13	1.0008	0.9983			before	0.993331	13	0.0331662	0.00919866
-3	1.01367	0.995179	1.02684	0.994678	0.915677	0.927703	0.967107	0.877527	0.960542	0.966081	0.991855	0.889339	1.02122	0.96519	0.01421								after	1.02658	13	0.0842988	0.0233803
-1.5	1.01433	1.00377	1.02684	0.994678	1.08902	0.927703	1.04668	0.877527	0.960542	0.966081	1.0409	0.889339	1.02122	0.98913	0.01804
--	0	0	0	0	0	0	0	0	0	0	0	0	0	--	--
--	0	0	0	0	0	0	0	0	0	0	0	0	0	--	--
--	0	0	0	0	0	0	0	0	0	0	0	0	0	--	--
1.5	1.1079	1.02053	1.05786	0.941105	1.0029	0.895317	0.896989	0.945254	1.06616	1.09257	1.04451	0.769086	1.00412	0.98802	0.02762
3	1.08947	1.02892	1.097	0.941105	0.97935	0.913213	0.920819	0.993936	1.01248	1.09257	1.04645	0.81772	1.00412	0.99516	0.02354
4.5	1.08099	1.0373	1.07047	0.992798	0.955796	0.931108	0.956565	0.96034	1.0818	1.07994	1.04838	0.866355	1.04135	1.00794	0.01995
6	1.09736	1.02772	1.05467	0.994705	0.837515	0.966899	0.992311	0.926744	1.11157	1.10722	1.07633	0.991822	1.03657	1.01703	0.02261
7.5	1.11373	1.04338	1.05777	0.996613	0.992425	1.10352	1.06293	0.835773	1.0253	1.1345	1.05685	1.11729	1.03179	1.04399	0.02227
9	1.1023	1.04568	1.06087	0.931891	0.947575	0.949839	1.04667	0.770483	1.07266	1.08156	1.03736	0.921673	0.997024	0.99735	0.0264
10.5	1.09087	1.04798	1.08287	0.916715	0.902725	1.04795	1.0304	0.797838	1.12002	1.02861	1.04751	0.85212	0.984121	0.99613	0.02854
12	1.09811	1.04858	1.08355	0.909897	0.845796	1.10352	1.08995	0.825192	1.14452	1.10689	1.05766	0.845599	0.971217	1.01004	0.03325
13.5	1.10536	1.04917	1.08424	0.885878	1.01655	1.1537	1.16397	0.887135	1.14044	1.03721	1.07026	0.843009	0.983361	1.03233	0.03057
15	1.10391	1.0358	1.07973	0.896249	0.933121	1.08542	1.14536	0.949078	1.06491	1.05865	1.08286	0.84042	0.995504	1.02085	0.02623
16.5	1.10247	1.02899	1.07521	0.923814	0.849688	1.01715	1.12674	0.990394	0.989379	1.08009	1.03727	0.841763	1.00819	1.00547	0.02561
18	1.10119	1.02217	1.0516	0.951379	0.849357	0.974303	1.01548	1.03171	1.03452	1.0997	0.990714	1.0192	1.02087	1.01248	0.0187
19.5	1.06812	1.04202	1.07075	0.959506	0.900962	0.931454	1.04429	0.90572	1.07967	1.1418	0.990549	1.10751	0.998924	1.01856	0.02237
21	1.0798	1.04756	1.0722	0.967634	0.952566	1.03248	1.07309	0.9072	1.07274	1.12718	1.01358	1.15125	0.98229	1.03689	0.02029
22.5	1.09148	1.0531	1.07365	0.994718	0.909449	1.11915	1.09095	0.90868	1.06582	1.11257	1.03661	1.12322	0.965656	1.04193	0.02165
24	1.09773	1.04196	1.05523	1.0218	0.866331	1.13128	1.10882	0.908843	0.974824	1.08365	1.06407	1.09519	1.03855	1.03756	0.02267
25.5	1.10398	1.03057	1.05912	1.00897	0.956138	1.13305	1.06215	0.909006	1.04727	1.05473	1.09153	1.0986	1.04896	1.04647	0.01763
27	1.10704	1.02463	1.063	0.996147	0.951026	1.02572	1.13384	0.984345	1.06964	1.12749	1.07938	1.10202	1.05141	1.05505	0.01631
28.5	1.11009	1.03229	1.0769	1.00077	0.945915	0.91839	1.17449	0.860316	1.09202	1.08014	1.06723	1.03873	1.0618	1.03531	0.0246
30	1.10449	1.03994	1.09081	1.00539	0.936081	0.899419	1.09827	0.861304	1.11265	1.03279	1.08099	0.919403	1.04098	1.01712	0.0248
31.5	1.09888	1.02802	1.07924	0.981121	0.926248	1.01664	1.02205	0.862293	0.980358	1.09533	1.09475	0.977882	1.02017	1.01407	0.02026
33	1.08595	1.02007	1.07092	0.956857	1.00063	0.963936	0.910728	0.89566	1.06242	1.06069	1.06144	1.03636	0.968152	1.00722	0.01823
34.5	1.0864	1.03031	1.06261	1.00716	0.987282	0.911236	0.893922	0.929027	1.111	1.02606	1.08772	0.889888	0.990005	1.00097	0.02198
36	1.08686	1.04055	1.08789	0.962545	0.973931	1.01255	0.924372	0.864423	1.09073	1.02993	1.04113	0.955836	1.03569	1.00819	0.0198
37.5	1.1007	1.03738	1.08437	0.997846	0.872844	1.11387	1.07686	0.799819	1.07045	0.972637	1.06433	1.02178	1.0078	1.01698	0.02641
39	1.10981	1.03421	1.08084	1.03315	0.802277	1.05766	1.13685	0.853599	1.00113	0.954527	1.08754	0.975073	1.02705	1.01182	0.02798
40.5	1.10026	1.02489	1.08586	0.935515	0.755521	0.923177	1.15057	0.858339	0.956833	0.976928	1.07602	0.928364	1.01994	0.98402	0.03129
42	1.09071	1.04206	1.09088	0.917346	0.795658	0.991318	1.1643	0.981572	0.976764	1.01958	1.08983	1.03907	1.01283	1.0163	0.02655
43.5	1.08815	1.04071	1.10559	0.907124	0.835795	1.05946	1.08894	0.925371	0.996695	1.06224	1.07619	1.09759	0.979354	1.02025	0.02465
45	1.08559	1.03936	1.10997	0.920592	0.962825	1.00313	1.01358	0.869171	1.08085	1.11584	1.06256	1.10544	0.96533	1.02571	0.0226
46.5	1.11175	1.034	1.1092	0.934059	0.81907	0.9468	1.11982	0.841552	1.04138	1.14386	1.08169	1.11328	0.957589	1.01954	0.03159
48	1.10698	1.02863	1.0925	0.971217	0.795606	1.09912	1.123	0.813934	1.0019	1.14587	1.09498	0.952116	0.978415	1.01571	0.03258
49.5	1.10222	1.05091	1.0758	1.03439	0.888567	1.12652	1.12618	0.894159	1.03381	1.14788	1.06791	1.06144	0.999241	1.04685	0.02333
51	1.11087	1.05624	1.06876	1.01775	0.981528	1.14143	1.07294	0.974384	1.00804	1.12389	1.04084	1.06234	1.0077	1.05129	0.01529
52.5	1.10615	1.04672	1.08461	1.00111	0.900912	1.10314	1.09528	0.82777	0.982256	1.05061	1.01647	1.06325	1.01615	1.02265	0.02365
54	1.10144	1.0372	1.06817	0.949766	0.775414	1.06484	1.11763	0.921406	1.05571	1.09735	1.01364	0.955732	0.983664	1.01092	0.02725
55.5	1.09294	1.03844	1.05173	0.985449	0.71331	0.973339	1.04007	1.01504	1.09763	1.0831	1.05534	0.957679	1.03305	1.01055	0.02871
57	1.08444	1.04925	1.05953	1.02113	0.711722	1.04962	1.06242	0.854325	1.08344	1.0834	1.09703	0.959627	1.02149	1.01057	0.03208
58.5	1.10594	1.05785	1.06733	0.998541	0.740392	1.10343	1.08477	0.941392	1.06924	1.15022	1.08002	1.08013	1.00993	1.03763	0.03001
60	1.11544	1.06215	1.08585	0.949441	0.814002	1.12058	1.10937	1.02846	0.998918	1.10078	1.06301	1.09981	0.976127	1.0403	0.02535

## Sheet: 2N_to_P
	ACSF														L-365,260																		ACSF				L-365,260				two-way RM ANOVA
Time (min)	RecSite1	RecSite2	RecSite3	RecSite4	RecSite5	RecSite6	RecSite7	RecSite8		mean	sem			Time (min)	RecSite1	RecSite2	RecSite3	RecSite4	RecSite5	RecSite6	RecSite7	RecSite8	RecSite9	RecSite10		mean	sem						before	after			before	after
-22.5	1.22883	1.0287	0.817665	1.13732	0.917873	0.899232	1.11715	1.01121		1.01975	0.0520829			-22.5	0.952472	1.07882	0.840055	1.06927	1.18879	0.898128	0.833292	0.901051	0.948363	1.2059		0.991614	0.0453807					RecSite1	0.967763	1.28729		RecSite1	1.1005	1.14937			ANOVA table	SS	DF	MS	F (DFn, DFd)	P value
-21	0.880915	0.897824	1.04169	1.2905	1.03544	0.938078	0.9834	0.989254		1.00714	0.0486188			-21	1.09521	1.07516	0.962579	0.655604	0.586469	0.610693	0.912685	0.959588	0.93541	0.943075		0.873647	0.0622925					RecSite2	0.992581	1.4705		RecSite2	1.09037	1.18035			Interaction	0.3893	1	0.3893	F (1, 16) = 53.29	P<0.0001
-19.5	0.97134	1.10231	1.26571	1.15861	1.07225	1.0276	0.933171	0.868348		1.04992	0.0484236			-19.5	1.01277	0.994829	1.0851	1.27333	0.900877	0.854306	1.08831	1.09273	1.04412	1.16435		1.05107	0.0404397					RecSite3	0.96756	1.35018		RecSite3	0.976023	1.17615			Drug	0.3059	1	0.3059	F (1, 16) = 27.56	P<0.0001
-18	0.994599	0.809806	1.26027	1.31048	1.10907	0.878181	0.882943	1.0191		1.03306	0.0688691			-18	0.930338	0.914498	1.00659	1.20044	1.21529	1.09792	1.037	1.07534	1.02143	1.1024		1.06012	0.0333627					RecSite4	0.892684	1.46153		RecSite4	0.944231	0.955766			Time	0.5499	1	0.5499	F (1, 16) = 75.25	P<0.0001
-16.5	1.01786	1.07597	1.0213	0.947246	1.00434	1.04217	0.933947	0.943496		0.99829	0.0195124			-16.5	1.12631	1.07977	0.911084	1.12754	1.17073	1.03393	0.985698	1.05794	1.04737	1.02655		1.05669	0.0251319					RecSite5	0.991959	1.61119		RecSite5	0.954478	0.867251
-15	0.989277	1.04637	0.904785	0.770382	1.06041	1.04386	0.869778	0.867894		0.944095	0.0401619			-15	1.1507	1.04334	0.815579	0.81749	0.652348	0.427405	0.956749	1.25613	1.11337	1.17085		0.940396	0.0871091					RecSite6	0.996965	1.70625		RecSite6	0.974427	1.02702
-13.5	0.900492	0.858187	0.788274	0.746469	1.112	1.04556	0.914449	0.949321		0.914344	0.0462757			-13.5	1.00362	1.0069	0.885499	0.82881	0.718232	0.527062	0.927801	0.817167	1.05754	0.792144		0.856478	0.0526706					RecSite7	1.03962	1.36673		RecSite7	1.04493	1.01613			Bonferroni comparison
-12	1.02842	1.01545	1.04232	1.16382	1.09096	0.98987	1.06411	0.972287		1.04591	0.023066			-12	1.14763	1.09512	0.900813	1.02537	0.784116	0.659846	1.04772	1.11853	0.870636	0.823067		0.947285	0.0544574					RecSite8	1.01222	1.27171		RecSite8	0.988764	1.03715			ACSF before vs after	p<0.0001
-10.5	1.15636	1.17272	0.992087	0.958299	1.03169	0.93474	1.03667	1.01957		1.03777	0.0324703			-10.5	1.14624	1.12662	0.889694	0.89662	0.795375	0.480852	1.08684	0.88806	0.953296	0.779967		0.904357	0.0658141									RecSite9	1.00807	1.02741			L-365,260 before vs after	p=0.6354
-9	1.07929	1.07919	0.941848	0.752782	0.972419	0.879611	1.00923	1.06685		0.972653	0.0430665			-9	1.14485	1.13768	0.759115	0.888046	0.806635	0.96965	1.12595	0.989915	1.03596	0.919694		0.977749	0.0454827									RecSite10	0.982811	1.02226			ACSF before vs L-365,260 before	p>0.9999
-7.5	1.16757	1.09683	0.779089	0.9426	0.87007	1.03563	1.13605	1.05287		1.01009	0.0511484			-7.5	1.11879	1.14873	1.16664	0.879471	1.08975	1.45845	1.05019	1.09177	0.864425	1.05942		1.09276	0.0548354														ACSF after vs L-365,260 after	p<0.0001
-6	0.983204	1.11448	1.26533	0.894476	0.942223	1.00113	1.12619	1.10504		1.05401	0.0455988			-6	1.09733	1.10444	1.18081	1.17458	0.826812	0.87708	0.909171	0.896186	1.02264	1.05313		1.01422	0.0428886
-4.5	0.798842	0.924986	0.906982	0.846351	1.01438	0.966625	1.10883	1.09211		0.957388	0.0417662			-4.5	1.07586	1.06015	1.10474	1.05622	1.19867	1.18749	1.03321	0.740535	1.04162	0.867635		1.03661	0.0461345
-3	0.787087	0.829276	1.02744	0.925835	0.912718	0.956938	1.07991	1.07918		0.949799	0.0410819			-3	1.07794	1.1319	1.02867	0.937854	1.33642	1.57821	1.15725	1.04467	1.0606	1.18111		1.15346	0.0611973
-1.5	0.787087	0.788323	1.02744	0.925835	0.912718	1.11567	1.05098	0.917073		0.940642	0.0448763			-1.5	1.04207	1.04882	1.02867	0.937854	1.33642	1.57821	1.15436	1.04467	1.0606	1.18111		1.14128	0.0627602
--	0	0	0	0	0	0	0	0		0	0			--	0	0	0	0	0	0	0	0	0	0		0	0
--	0	0	0	0	0	0	0	0		0	0			--	0	0	0	0	0	0	0	0	0	0		0	0
--	0	0	0	0	0	0	0	0		0	0			--	0	0	0	0	0	0	0	0	0	0		0	0
1.5	1.48222	1.68766	1.61885	1.66243	1.36132	1.32494	1.42229	1.44235		1.50026	0.052544			1.5	1.16181	0.970037	1.00445	1.20136	1.20677	1.19815	0.880437	0.731234	1.01779	1.06165		1.04337	0.052293
3	1.36027	1.54768	1.49741	1.66243	1.36132	1.32494	1.42229	1.44235		1.45233	0.0426788			3	1.16181	1.02538	1.00445	1.20412	1.20677	1.11542	0.880437	0.731234	1.01234	1.05941		1.04014	0.0495268
4.5	1.23833	1.40769	1.37596	1.74202	1.47053	1.50609	1.45675	1.55391		1.46891	0.0551251			4.5	1.17453	1.08073	0.645491	1.40703	1.31058	1.1649	0.841477	0.823016	1.00689	1.10197		1.05566	0.0776105
6	1.24659	1.40324	1.42858	1.58021	1.38107	1.41084	1.49122	1.5919		1.44171	0.0425091			6	1.18725	1.3021	0.883304	0.540078	1.23528	1.21438	1.06529	0.941612	0.938017	1.14453		1.04518	0.0757497
7.5	1.25486	1.3988	1.36004	1.47505	1.38108	1.42833	1.50421	1.62989		1.42903	0.0419966			7.5	1.10787	1.19976	1.28767	1.37358	1.15999	1.11304	0.957151	1.06021	0.86914	0.846013		1.09744	0.0570444
9	1.28145	1.42971	1.29151	1.36988	1.38109	1.44581	1.39691	1.41457		1.37637	0.0229568			9	1.2435	1.30789	1.0872	0.79328	0.905592	1.0117	0.849009	1.00643	0.904839	0.920608		1.00301	0.0557314
10.5	1.36976	1.56546	1.32662	1.62515	1.61132	1.57603	1.28961	1.3102		1.45927	0.0557255			10.5	1.27193	1.32479	1.06506	0.434083	1.16802	1.27125	1.19782	1.1346	1.02772	1.09161		1.09869	0.0842361
12	1.3495	1.42453	1.32734	1.63401	1.69605	1.40838	1.50875	1.59844		1.49337	0.0519739			12	1.27444	1.32071	0.865255	0.625029	0.859149	0.950601	0.936871	0.938667	0.905782	1.02029		0.969679	0.067316
13.5	1.39044	1.59849	1.32806	1.64286	1.63559	1.49536	1.29239	1.12357		1.43834	0.0706356			13.5	1.23165	1.31662	0.824798	0.893733	0.959959	0.976694	1.00518	1.11856	0.945567	0.948979		1.02217	0.0512532
15	1.43139	1.56138	1.5879	1.73463	1.57514	1.58233	1.2982	1.23777		1.50109	0.062785			15	1.18887	1.22118	0.850946	0.702337	1.06077	1.00279	1.07349	1.29845	0.985352	0.837969		1.02221	0.0623728
16.5	1.39463	1.52426	1.66431	1.64919	1.51042	1.60754	1.33284	1.31714		1.50004	0.0522948			16.5	1.12449	1.09769	0.877095	0.993269	0.886062	0.752467	1.00231	1.25994	0.919215	0.952017		0.986456	0.0483068
18	1.40191	1.56239	1.50939	1.56376	1.56942	1.80125	1.36748	1.39651		1.52152	0.053032			18	1.1446	1.17749	1.255	1.2842	0.711355	0.882456	1.12446	1.18039	0.993384	1.06607		1.08194	0.0588613
19.5	1.29854	1.42438	1.35446	1.55685	1.51406	1.62662	1.51156	1.38835		1.45935	0.0419744			19.5	1.09383	1.02681	1.26027	1.10213	0.901844	1.01245	1.01241	1.10084	0.917148	0.90697		1.03347	0.0372049
21	1.3627	1.51455	1.58784	1.56402	1.51707	1.57603	1.38533	1.38019		1.48597	0.0358218			21	1.04135	1.04367	0.928574	0.635804	1.13749	1.25346	0.900372	1.01957	1.00984	1.11372		1.00839	0.0552366
22.5	1.36564	1.46053	1.26674	1.55289	1.50529	1.51672	1.29258	1.11385		1.38428	0.057522			22.5	1.09726	1.11106	1.39914	1.07882	1.00585	1.06098	1.13265	1.34177	0.911773	0.992265		1.11316	0.050341
24	1.36858	1.4065	1.37048	1.47278	1.55645	1.62585	1.31439	1.30258		1.4272	0.0437019			24	1.15317	1.17845	1.37592	1.13649	0.874205	0.868499	0.797047	0.982505	1.03169	0.870808		1.02688	0.0608918
25.5	1.34965	1.47612	1.18077	1.5622	1.44502	1.58774	1.33621	1.4913		1.42863	0.050673			25.5	1.25356	1.24496	1.3527	1.19415	1.10366	1.06015	0.846647	1.02257	0.971221	1.22719		1.12768	0.0514242
27	1.38559	1.51614	1.15364	1.34689	1.48534	1.42117	1.22952	1.34509		1.36042	0.0461779			27	1.14055	1.10085	1.03998	1.046	1.14531	1.04778	1.15963	1.06263	0.910747	1.0114		1.06649	0.0249278
28.5	1.42153	1.55617	1.12652	1.20824	1.52565	1.6724	1.40346	1.36198		1.40949	0.0680853			28.5	1.11927	1.1379	0.727263	0.591655	1.04609	1.2256	1.10351	0.906228	1.00834	1.08453		0.995039	0.0660968
30	1.36539	1.49439	1.15005	1.1856	1.73893	1.92362	1.43715	1.54247		1.4797	0.0988165			30	1.14959	1.14124	0.745482	0.303058	1.3105	1.33976	0.955905	1.06499	1.04108	1.15011		1.02017	0.101288
31.5	1.30925	1.43261	1.17358	1.22096	1.6013	1.80699	1.47085	1.41384		1.42867	0.0779088			31.5	1.1772	1.19443	0.763701	0.664016	0.872707	0.813518	0.808305	1.22375	1.07382	0.97006		0.95615	0.0669284
33	1.30625	1.45492	1.19512	1.25633	1.57367	1.80603	1.28617	1.28521		1.39546	0.0776457			33	1.20148	1.22893	1.10278	0.669449	0.925533	0.902988	0.999945	1.00495	0.970165	0.790006		0.979623	0.0575901
34.5	1.37763	1.52617	1.46953	1.33712	1.68585	1.8618	1.44634	1.17835		1.48535	0.0799463			34.5	1.22576	1.26342	0.625286	0.519373	0.978359	0.992458	0.948355	0.889884	1.018	1.11056		0.957145	0.078667
36	1.44902	1.59741	1.2096	1.41792	1.79803	1.91757	1.40607	1.46034		1.532	0.0867268			36	1.20674	1.24162	0.805804	0.369298	1.05225	1.12159	1.13426	1.17938	1.06584	1.13766		1.03144	0.0873288
37.5	1.38322	1.54726	1.37449	1.46796	1.59395	1.5968	1.36579	1.58295		1.48905	0.0390659			37.5	1.18772	1.21982	1.03293	1.04079	0.993095	1.22273	0.993002	0.931518	0.907364	1.16476		1.06937	0.0397997
39	1.3797	1.50051	1.53938	1.518	1.38987	1.42627	1.31065	1.35901		1.42792	0.0313257			39	1.15961	1.16212	1.01022	1.1251	0.933943	1.07289	0.85175	0.954414	1.06292	0.96454		1.02975	0.0347144
40.5	1.2313	1.4131	1.18993	1.26314	1.61646	1.8326	1.25551	1.13507		1.36714	0.0912403			40.5	1.16822	1.05053	0.880715	1.34588	0.992549	1.04686	1.00391	0.97731	1.05921	1.00898		1.05342	0.0419503
42	1.41393	1.60268	1.43292	1.61944	1.67085	1.62463	1.2815	1.07293		1.46486	0.078467			42	1.16367	1.10839	0.751214	0.311579	1.06912	1.02083	0.890315	0.999017	1.0555	1.05341		0.942306	0.0834625
43.5	1.40825	1.58969	1.32946	1.68069	1.72525	1.41667	1.22853	1.10901		1.43594	0.0820176			43.5	1.2151	1.17943	1.07578	1.22486	0.778323	1.32614	1.17235	1.20191	0.959256	0.947151		1.10803	0.0553883
45	1.40257	1.5767	1.22599	1.3034	1.7586	1.52578	1.43014	1.17333		1.42456	0.0732225			45	1.26652	1.25047	1.16706	0.674343	0.782021	1.08222	1.21603	1.14585	0.974843	0.820561		1.03799	0.071002
46.5	1.35253	1.54914	1.58437	1.68231	1.62314	1.62297	1.35138	1.06904		1.47936	0.0781423			46.5	1.14085	1.17345	1.25835	0.547968	0.785718	0.838305	1.09423	1.08979	1.12713	1.13876		1.01945	0.0738396
48	1.3025	1.52157	1.31099	1.50442	1.46941	1.72015	1.27262	1.3582		1.43248	0.0571356			48	1.13145	1.10402	0.930298	0.421592	0.770452	0.833042	0.972438	0.79204	1.02267	1.12835		0.910636	0.0727939
49.5	1.41302	1.54312	1.22506	1.32653	1.57585	1.68315	1.36672	1.20244		1.41699	0.0647731			49.5	1.12204	1.22783	1.23244	1.14099	0.755186	0.750144	1.08602	1.04387	0.918219	0.818747		1.00955	0.0619658
51	1.24944	1.44127	1.13913	1.24211	1.6056	1.6002	1.37376	1.29367		1.36815	0.0644577			51	1.22892	1.21877	0.743844	0.91264	0.665044	0.711323	0.983723	1.26872	0.996808	0.949884		0.967967	0.0731796
52.5	1.24437	1.42318	1.24064	1.34566	1.71059	1.73571	1.35174	1.08998		1.39273	0.0857489			52.5	1.14664	1.20971	1.271	0.969019	0.787593	0.805844	0.881423	1.02375	1.0754	1.08102		1.02514	0.0548005
54	1.23931	1.4051	1.36282	1.44922	1.59716	1.87122	1.32972	1.38706		1.4552	0.0744091			54	1.17013	1.20721	1.35242	1.29032	0.910141	0.900365	1.17163	0.778782	1.02594	1.04889		1.08558	0.0615223
55.5	1.22756	1.4007	1.48282	1.49657	1.48373	1.52402	1.47212	1.33546		1.42787	0.03819			55.5	1.15971	1.20082	1.38877	1.39227	0.875762	1.4261	1.05147	1.38852	0.976491	1.01675		1.18767	0.0675949
57	1.25839	1.3963	1.60281	1.54393	1.70491	1.9026	1.40005	1.28385		1.51161	0.0834631			57	1.16778	1.19443	1.28153	1.14868	0.841383	1.39607	0.877155	0.748557	0.989542	1.00974		1.06549	0.0689411
58.5	1.28922	1.54471	1.38532	1.31146	1.67141	1.51687	1.48303	1.49307		1.46189	0.0481297			58.5	1.09117	1.15389	1.17429	0.905089	1.05306	1.36604	0.973461	1.02145	1.08075	0.887357		1.07066	0.046961
60	1.29656	1.47991	1.16782	1.71306	1.67008	1.88559	1.26613	1.20435		1.46044	0.101491			60	1.13506	1.11336	1.12852	0.829088	1.22816	1.24295	1.06977	1.21606	1.06114	1.14305		1.11672	0.0396634

## Sheet: 2S1A
normalize
473nm
power(mw)											mean	std	sem
40	0.927939	1	0.844655	1	0.946533	1	1	1	1		0.968792	0.0541042	0.0180347
30	1	0.877664	1	0.822747	1	0.887257	0.861803	0.812524	0.907173		0.907685	0.0752165	0.0250722
25	0.96956	0.823849	0.911754	0.478462	0.667123	0.585953	0.439216	0.655358	0.696716		0.691999	0.182155	0.0607183
18	0.821414	0.688441	0.390992	0.360405	0.246753	0.288759	0.38016	0.353866	0.555947		0.454082	0.193266	0.064422
10	0.572389	0.430637	0.184892	0.370605	0.213061	0.183667	0.359461	0.271332	0.253581		0.315514	0.129872	0.0432908
5	0.334922	0.304926	0.20359	0.269013	0.182255	0.151825	0.11823	0.188909	0.185845		0.215502	0.072	0.024
2.5	0.324212	0.175711	0.0195377	0.181035	0.140245	0.120394	0.0513501	0.189487	0.0900414		0.143557	0.0897765	0.0299255
normalize
635nm
power(mw)											mean	std	sem
40	0.0734939	0.0396083	0.0415937	-0.0634126	0.0393546	0.019409	0.0303804	0.0944456	0.081063		0.0395484	0.0460764	0.0153588
30	0.0121038	-0.0486454	0.0201552	0.0558492	0.029058	0.0200273	0.0298972	-0.000726092	-0.035616		0.00912258	0.0329727	0.0109909
25	-0.281383	-0.0764083	-0.106363	-0.228158	-0.0964025	-0.0873704	-0.0755185	0.0437684	0.0330287		-0.0972007	0.105468	0.0351561
18	0.125212	0.0601477	0.13469	0.0635846	0.021783	0.0344449	-0.000464692	-0.00159148	-0.000615205		0.0485768	0.0523295	0.0174432
10	0.0496395	0.0219694	0.116171	0.0403239	0.00994116	0.00651277	-0.348001	-0.132045	-0.074349		-0.0344264	0.137664	0.045888
5	0.0994294	-0.020252	-0.0579679	0.191784	0.0656856	-0.0495356	-0.107611	-0.0475918	-0.0368678		0.00411919	0.0950379	0.0316793
2.5	-0.0978062	-0.0688861	-0.168311	0.0267188	-0.00118425	0.0248713	0.158622	0.0699614	0.156674		0.0111845	0.110369	0.0367896

## Sheet: 2S1B
normalize
635nm
power(mw)														mean	std	sem
40	1	1	1	1	1	0.849156	0.911996	1	1	0.232027	1	1		0.916098	0.220703	0.0637115
30	0.95722	0.850031	0.719251	0.819252	0.995793	1	0.925554	0.541457	0.891255	0.879739	0.626294	0.71271		0.826546	0.147426	0.0425582
25	0.619494	0.326062	0.501417	0.679611	0.633082	0.744876	1	0.514428	0.937452	0.475415	0.387484	0.54914		0.614038	0.203529	0.0587538
18	0.412059	0.462275	0.406318	0.538694	0.838551	0.432667	0.741602	0.828184	0.801622	0.801343	0.281102	0.656669		0.600091	0.199701	0.0576487
10	0.46002	0.384977	0.228156	0.377473	0.7391	0.315151	0.589887	0.0289557	0.332337	1	0.0622431	0.384773		0.408589	0.27099	0.078228
5	-0.0193493	0.0517924	0.0307402	-0.388172	0.253271	-0.157374	0.374014	0.324555	0.399396	0.438609	-0.36382	-0.398182		0.0454566	0.317208	0.0915699
2.5	-0.102857	0.0518667	-0.10297	-0.18802	-0.219388	-0.144694	-0.13939	0.179454	-0.0757813	0.23382	-0.0197493	-0.0294646		-0.0464311	0.140041	0.0404265
normalize
473nm
power(mW)														mean	std	sem
40	0.066797	0.053184	0.0297159	-0.00517551	0.125801	0.125472	0.339387	0.134529	0.32124	0.271326	0.178107	0.14452		0.148742	0.111593	0.032214
30	0.0560288	0.046307	0.0343049	0.0391338	0.190492	0.0209736	0.169067	-0.0485001	0.0961549	-0.679345	0.0419157	0.0318076		-0.000138282	0.22344	0.0645015
25	0.00102015	0.0184393	0.0038354	0.10105	0.114629	0.0879002	-0.431467	-0.103557	-0.169607	-0.29442	0.0595439	0.060726		-0.0459922	0.172052	0.0496671
18	-0.0390307	-0.0385022	-0.0330621	-0.0404742	-0.0158854	-0.0502384	0.106365	0.0181524	-0.209789	-0.331528	-0.00859388	-0.00145819		-0.0536703	0.112649	0.032519
10	0.0139948	0.0535575	0.00346118	0.0824337	0.230039	0.118019	0.0470557	-0.00274362	-0.0648738	0.00842234	-0.15584	-0.0688406		0.0220571	0.0983529	0.028392
5	-0.0168896	-0.0565519	0.0154963	-0.156233	-0.32928	-0.248172	0.0386542	-0.0378472	-0.0758494	-0.300671	-0.050576	-0.0832693		-0.108432	0.122708	0.0354228
2.5	0.0153927	-0.0170306	0.0589933	-0.0357984	-0.118554	-0.101508	-0.0823887	-0.00980048	0.0825749	-0.47714	-0.000708652	0.0269202		-0.0549206	0.146332	0.0422423

## Sheet: 2S1D-E
	High Intensity Noise + Pre/Post Pairing											LTP Curve				Piared t-test
Time (min)	RecSite1	RecSite2	RecSite3	RecSite4	RecSite5	RecSite6	RecSite7	RecSite8	RecSite9	RecSite10		mean	sem			before	after
-22.5	1.0301	1.04653	0.998499	0.905742	1.04378	1.19653	0.880556	0.853398	1.03265	0.927955		0.991573	0.0340305		RecSite1	1.02131	1.13793
-21	1.05923	0.985951	1.01487	0.860255	1.13544	1.12154	0.890464	0.729657	1.03329	0.953901		0.978459	0.0416107		RecSite2	1.03426	0.987759
-19.5	1.08836	0.850041	0.905575	0.815934	1.16097	1.13029	0.808474	0.690185	1.04709	0.996331		0.949326	0.052728		RecSite3	1.00342	0.820804
-18	1.19921	1.08738	0.982413	0.969759	1.16947	1.17326	0.788532	0.692847	1.0609	1.01739		1.01412	0.0553737		RecSite4	1.06725	0.854228
-16.5	1.03405	1.19754	1.05925	1.12358	1.17797	1.21624	0.923711	0.786126	1.0399	1.03844		1.05968	0.0439432		RecSite5	0.959086	1.38261
-15	0.868898	1.28626	1.05119	1.17963	1.22266	1.14201	1.05889	0.879406	1.00073	1.05462		1.07443	0.0457266		RecSite6	0.984055	1.10687
-13.5	1.13379	1.31779	1.04314	1.15744	1.03987	1.06779	0.885719	0.796635	0.926313	1.07079		1.04393	0.0493521		RecSite7	1.05429	0.955502
-12	1.03049	1.12864	1.00293	1.13525	0.857079	0.827098	1.14553	0.954303	0.915575	0.996339		0.999324	0.0379253		RecSite8	1.08022	1.02869
-10.5	0.927187	0.939498	0.962726	1.08191	0.851108	0.779243	0.963251	1.04738	0.929632	1.02608		0.950802	0.0300179		RecSite9	0.988598	1.18599
-9	1.08195	1.08427	0.929575	1.02858	0.845137	0.901452	1.0296	1.22978	0.943689	1.05582		1.01298	0.0371122		RecSite10	1.03601	1.15896
-7.5	1.14897	0.991688	0.896423	1.00197	1.16801	1.02366	1.09594	1.31654	1.071	1.0785		1.07927	0.0384177
-6	1.17213	0.899102	0.956137	0.897518	0.865387	0.967599	1.20465	1.3752	1.0974	1.0807		1.05158	0.0548237
-4.5	1.0388	0.898701	1.01585	0.997051	0.805713	1.05256	1.11372	1.19067	1.03929	1.03173		1.01841	0.035309
-3	0.905467	0.8983	1.0881	1.09658	0.913868	1.13752	1.02279	1.00613	0.981178	0.98276		1.00327	0.0280655
-1.5	0.905467	0.8983	1.0881	1.09658	1.02202	0.94161	1.02279	1.00613	0.981178	0.98276		0.994494	0.0225444		t=0.6357,df=9, p=0.5408, n=10
--	0	0	0	0	0	0	0	0	0	0		0	0
--	0	0	0	0	0	0	0	0	0	0		0	0
--	0	0	0	0	0	0	0	0	0	0		0	0
1.5	1.65935	1.50935	0.668176	1.04523	1.38965	1.21432	1.01009	0.730316	1.08766	1.0513		1.13654	0.105456
3	1.65935	1.26806	0.655324	0.962922	1.38965	1.21432	0.96406	0.915296	1.08766	1.07239		1.1189	0.0932635
4.5	1.22682	1.02678	0.636047	0.880612	1.3087	1.05973	0.918027	1.10028	1.1431	1.09349		1.03936	0.0636585
6	1.24748	0.909893	0.677296	0.849524	1.22776	1.03419	0.925123	1.04259	1.19776	1.13568		1.02473	0.061665
7.5	1.26814	1.05402	0.718545	0.818436	1.00524	1.00865	0.932219	0.984902	1.22764	1.09703		1.01148	0.0557595
9	1.4881	1.27114	0.820321	1.07087	1.17746	1.21995	0.871415	0.805047	1.19558	1.07637		1.09963	0.0727172
10.5	1.70807	1.45783	1.00567	0.933388	1.34968	1.24838	0.81061	0.860374	1.16352	1.15709		1.16946	0.0942169
12	1.73417	1.57794	1.01692	1.00991	1.17481	1.23052	0.878401	0.9157	1.19468	1.23781		1.19709	0.0919623
13.5	1.67486	1.50915	0.934324	1.15597	1.04146	1.21265	0.809524	0.819534	1.15195	1.11134		1.14208	0.0924779
15	1.61554	1.34591	0.851724	0.831528	1.23405	1.15607	0.742462	0.785347	1.10921	1.032		1.07039	0.0932186
16.5	1.29742	1.18267	0.999619	0.887319	1.09976	1.0995	0.732428	0.782151	1.07482	1.05396		1.02096	0.0585357
18	1.54884	1.00282	1.01895	0.943109	0.965469	1.06189	0.750907	0.84502	1.07359	1.12656		1.03372	0.0707967
19.5	1.75083	1.27061	1.03828	0.993309	1.20975	1.02428	0.898977	0.90789	1.07237	1.19917		1.13655	0.0831638
21	1.36075	1.14972	0.929043	1.04351	1.0164	1.15915	0.935024	0.982426	1.11449	1.248		1.09385	0.0466325
22.5	1.48677	1.02883	1.03992	1.12039	1.09471	1.02425	0.971072	1.05696	1.15662	1.24677		1.12263	0.0500062
24	1.6128	0.950338	1.06542	1.05531	1.2081	1.20421	0.895097	0.904218	1.14615	1.24554		1.12872	0.07084
25.5	1.23832	0.87185	0.989102	0.990234	1.3215	1.12098	0.86557	0.819428	1.13568	1.21015		1.05628	0.0580552
27	1.58996	0.983726	0.912782	0.783198	1.04574	1.03775	0.836044	0.824301	1.16389	1.17476		1.03521	0.0792867
28.5	1.68803	0.966056	0.934407	0.924258	0.911553	0.919352	0.802757	0.829174	1.1921	1.23189		1.03996	0.0890064
30	1.6593	0.948385	0.992069	1.06532	0.877038	0.89038	0.797501	0.88758	1.08923	1.23139		1.04382	0.0835001
31.5	1.63058	1.36438	1.04973	0.978147	0.892359	0.90612	0.792245	0.945987	1.10783	1.23089		1.08983	0.0849169
33	1.13206	1.20141	0.947675	0.890977	0.875404	1.01266	0.978596	1.09234	1.12644	1.15833		1.04159	0.0386593
34.5	1.06942	0.950195	0.872217	0.946265	0.868613	1.1192	0.82425	0.835496	1.09648	1.23454		0.981667	0.0467317
36	1.00679	0.882768	0.796759	1.00155	0.866905	1.09362	0.802674	0.817196	1.15736	1.25427		0.96799	0.0536451
37.5	1.38836	1.10527	0.868934	1.07536	0.960329	1.06665	0.847484	0.918169	1.19383	1.25419		1.06786	0.0584649
39	1.36078	1.32776	0.941109	1.14916	1.05375	1.03969	0.892294	1.01914	1.2303	1.20459		1.12186	0.0528382
40.5	1.33321	1.08641	0.814882	1.10466	1.21428	1.09604	0.951583	0.974523	1.22967	1.15499		1.09602	0.0504808
42	1.63253	1.17435	0.853824	1.20705	1.37481	1.15239	1.01087	0.929904	1.22904	1.17882		1.17436	0.074028
43.5	1.61564	1.26229	0.964177	1.25618	1.21958	1.20774	0.889493	0.948726	1.23241	1.20266		1.17989	0.069603
45	1.59874	1.01488	1.02277	1.24831	1.06435	1.1791	0.905791	0.967549	1.23578	1.23724		1.14745	0.066805
46.5	1.26564	1.0606	0.967723	1.21194	1.26665	1.15046	0.917666	0.986352	1.14613	1.16647		1.11396	0.0415876
48	1.53742	1.10632	0.912677	1.06879	1.31452	1.03782	0.906162	1.02006	1.16933	1.09571		1.11688	0.0631736
49.5	1.68939	1.1478	0.864234	0.925633	1.20071	0.956764	0.894657	0.984176	1.19253	1.14581		1.10017	0.0810852
51	1.4216	1.18928	0.815791	0.777126	1.17364	0.971508	0.883896	0.926794	1.23602	1.19592		1.05916	0.0708048
52.5	1.15381	0.860947	0.954055	0.766006	1.14658	0.986251	0.873135	0.869412	1.2326	1.20657		1.00494	0.05569
54	0.918665	0.692266	0.974656	0.82358	1.34745	1.08224	0.928998	1.00139	1.22918	1.21722		1.02157	0.0667288
55.5	0.839096	0.837319	0.788884	0.881154	1.5552	1.23252	0.984862	1.04118	1.17426	1.07946		1.04139	0.0781603
57	0.837319	0.982372	0.732272	0.773692	1.67483	1.25639	0.999003	1.08097	1.11933	1.11649		1.05727	0.0911095
58.5	0.84899	0.99435	0.638622	0.687062	1.63387	1.21705	1.08565	1.17365	1.19555	1.16079		1.06356	0.0969572
60	0.867386	1.00633	0.559126	0.627298	1.51262	1.17772	1.08099	1.20291	1.16498	1.2051		1.04045	0.0959632

## Sheet: 2S1F-G
	High Intensity Noise + Pre/Post Pairing														LTP Curve				Piared t-test
Time (min)	RecSite1	RecSite2	RecSite3	RecSite4	RecSite5	RecSite6	RecSite7	RecSite8	RecSite9	RecSite10	RecSite11	RecSite12			mean	sem			before	after
-22.5	0.967121	0.38145	0.771539	0.58681	0.975449	0.946774	1.00962	1.05957	1.0975	0.919991	1.45785	0.985386			0.929922	0.0803143		RecSite1	0.92907	1.09248
-21	0.861694	0.659717	1.06052	1.26693	1.1397	1.04956	1.10205	1.20199	0.929105	0.982845	1.25912	0.864563			1.03148	0.0546921		RecSite2	0.84005	1.07795
-19.5	1.33065	1.25915	1.01429	1.13164	1.11282	1.15234	1.19447	0.970418	0.760706	1.00974	0.715696	0.942918			1.04957	0.0560848		RecSite3	0.999791	0.797562
-18	1.33005	1.34212	0.968058	0.996341	1.08594	1.02682	1.06269	0.738841	1.34407	1.03664	1.24834	1.02127			1.1001	0.0552129		RecSite4	0.970584	0.825039
-16.5	0.616499	0.763701	0.780322	0.633159	1.0833	1.16509	0.930915	0.925005	0.62416	0.901907	1.06324	1.16983			0.888093	0.0619098		RecSite5	1.05744	1.07512
-15	0.892357	0.787363	0.892472	0.706962	0.873449	0.857527	1.07078	1.25616	1.30358	1.01054	0.878136	1.16435			0.974473	0.0565897		RecSite6	1.08613	1.0713
-13.5	0.615838	0.91489	0.945053	0.947464	1.05766	0.977298	1.07543	1.22819	0.573596	1.01669	0.792649	1.15888			0.94197	0.0597607		RecSite7	0.946204	0.945242
-12	0.75111	1.04242	0.997634	1.18797	1.05476	1.09707	1.16818	1.20023	1.00164	1.11128	0.707161	0.99938			1.02657	0.0471982		RecSite8	0.997957	1.28024
-10.5	0.921469	0.983957	1.1973	1.27032	1.05186	1.14323	0.799494	0.771856	1.06223	0.959374	0.785411	0.791629			0.978179	0.0516794		RecSite9	0.887005	1.04679
-9	1.27358	0.981562	1.0622	1.35268	1.05262	1.04145	0.848834	0.676289	1.12282	0.933606	0.86366	0.980616			1.01583	0.0553734		RecSite10	0.989666	1.03954
-7.5	1.19421	0.979167	0.927104	0.668876	1.07562	1.11313	0.898175	0.792619	0.816356	0.919341	0.946476	0.820566			0.929303	0.0445654		RecSite11	0.875575	0.750144
-6	1.0053	0.476911	1.03147	0.921156	1.12942	1.12288	0.971774	0.90895	0.738484	0.924075	0.536876	0.827251			0.882879	0.0626986		RecSite12	0.981495	0.765601
-4.5	0.907663	0.421829	1.13583	1.17344	1.10519	1.13263	1.04537	1.23718	0.660612	0.928808	1.38674	1.17058			1.02549	0.0797428
-3	1.11631	1.22851	0.981557	0.679504	1.08095	1.21282	0.761592	0.923893	0.750453	1.04648	0.866078	0.94831			0.966371	0.0541462
-1.5	0.612871	0.583888	0.827289	0.797483	1.09284	1.16331	0.822404	0.984211	0.840294	1.04648	0.992557	0.953387			0.893085	0.0540634			t=0.3529, df=11, p=0.7308, n=12
--	0	0	0	0	0	0	0	0	0	0	0	0			0	0
--	0	0	0	0	0	0	0	0	0	0	0	0			0	0
--	0	0	0	0	0	0	0	0	0	0	0	0			0	0
1.5	1.01349	1.12436	1.03171	1.00615	0.909468	0.955131	0.891307	1.26725	0.684265	0.968704	1.07811	0.791488			0.976786	0.045809
3	1.01349	1.09135	0.59037	1.00615	0.881621	0.895909	1.04883	1.1596	1.32865	1.0946	1.07811	0.791488			0.998347	0.0571768
4.5	0.953525	1.05835	0.761469	1.05622	0.853773	0.836687	0.878065	1.12705	1.32648	1.11245	0.984576	0.753652			0.975192	0.0512213
6	0.893556	0.887825	0.932568	1.0387	0.969071	0.931572	0.64583	1.13441	1.08582	1.03208	0.891046	0.814911			0.938116	0.0393824
7.5	0.982609	0.953351	0.929794	0.890997	0.943674	0.929266	0.721303	1.14176	0.845165	0.951719	0.679227	0.87617			0.903753	0.036205
9	1.2353	1.01888	0.925878	1.05584	0.918276	0.926959	0.661519	1.2351	0.891671	0.945424	0.863449	0.817737			0.958003	0.0490912
10.5	1.07216	1.32045	0.921963	0.813468	1.0721	0.941502	0.907255	1.32844	0.938178	0.939129	1.03088	0.794034			1.00663	0.0517665
12	0.909028	1.1024	0.507028	0.57109	0.994832	1.07478	0.838884	1.19011	0.682145	0.973615	1.19831	0.770331			0.901046	0.0698146
13.5	1.01493	1.29843	0.488834	0.870327	0.961746	0.93753	0.684089	1.42464	1.25462	1.05669	1.24038	0.844127			1.00636	0.0814388
15	1.12083	1.06381	0.784747	0.668256	0.877437	1.00471	0.772489	1.36319	1.33683	1.07848	0.49312	0.912178			0.956339	0.0779463
16.5	1.06411	0.829187	0.682442	0.699643	1.0443	1.06626	0.860888	1.30174	0.788763	1.0441	0.790915	0.912847			0.923767	0.0552406
18	0.899014	0.8513	0.580137	0.731031	0.98335	1.09883	0.854149	1.32756	0.563909	0.962828	1.08871	0.913517			0.904528	0.0653711
19.5	1.22931	0.873412	0.477356	0.726376	0.897918	0.930587	0.847409	1.35338	0.689344	1.11632	0.675779	0.901876			0.893255	0.0743057
21	1.1016	0.917913	0.462892	0.604707	0.904208	0.840273	1.05129	1.60216	0.814779	1.09279	0.980119	0.776905			0.929137	0.0859819
22.5	0.973898	0.962413	0.460662	0.559055	0.910498	0.991876	0.853439	1.53476	1.12161	0.963509	1.28446	0.870201			0.957198	0.0859963
24	0.950007	0.990939	0.555879	0.681262	1.15144	1.14348	0.655585	1.38048	1.09874	1.04054	0.467029	0.877433			0.916067	0.0830345
25.5	1.03518	0.911012	0.651096	0.803469	1.07417	1.14174	0.745025	1.33086	1.36523	1.11757	1.10776	0.884666			1.01398	0.0667655
27	1.01058	0.831084	0.84376	1.09354	1.17382	1.04461	0.834465	1.28124	0.989672	1.11008	0.811519	0.763715			0.98234	0.0498217
28.5	0.975954	0.791477	1.03694	1.11454	0.930283	1.07017	0.907339	1.24554	0.61411	1.10954	0.51528	0.798372			0.925795	0.0647719
30	1.01605	1.03766	0.922776	0.589349	1.00561	1.09573	0.980212	1.20983	1.07742	0.974848	0.504399	0.833029			0.937242	0.0618418
31.5	1.19113	1.0407	0.88181	0.756446	1.02163	0.791068	0.800462	1.09476	0.962687	0.971137	0.493518	0.706669			0.892668	0.058277
33	1.27274	1.22277	0.840844	0.923543	0.976078	0.855882	0.620712	0.979698	0.847956	0.967425	0.855593	0.839752			0.933583	0.0528978
34.5	1.16638	1.18461	0.920979	1.01495	0.880919	0.938344	0.783313	1.0341	0.699363	0.953933	1.21767	0.867069			0.971802	0.0483052
36	1.06002	1.14644	1.00111	1.10635	1.15984	1.02081	0.945914	1.32562	0.620359	1.01712	1.19524	0.864162			1.03858	0.0541211
37.5	0.988374	1.06768	0.720932	0.99642	0.869692	0.924189	0.645771	1.03139	0.712439	1.06139	1.02682	0.851137			0.908019	0.0445002
39	1.20646	1.36052	0.667558	0.664221	0.918714	0.938133	0.605998	0.983839	0.804519	1.097	0.487862	0.814814			0.879137	0.0777104
40.5	1.14918	0.960178	0.538007	0.665682	0.994727	1.13487	0.757369	0.936287	1.06768	1.018	0.450768	0.774537			0.870608	0.0696319
42	1.27681	1.20185	0.589388	0.684299	1.05816	1.01834	0.908739	0.98925	0.685853	0.953368	0.413675	0.734259			0.876165	0.0776213
43.5	1.32938	1.26128	0.640768	0.877811	0.938022	0.901816	1.00383	1.51962	1.01855	0.975514	0.705842	0.8534			1.00215	0.0767707
45	1.27372	1.32071	0.873082	1.07132	1.00102	1.16162	1.09892	1.53581	0.738486	0.997661	1.17523	0.849475			1.09142	0.0670165
46.5	1.21806	0.984457	0.946018	1.00822	1.06401	1.02867	0.702584	0.958262	0.642467	0.928146	0.692472	0.782202			0.912964	0.0522227
48	1.01793	1.21866	0.779574	0.866572	1.0384	1.07305	0.811795	1.12781	0.638468	1.00643	0.832912	0.714929			0.927211	0.0537398
49.5	1.14977	1.29171	0.61313	0.724925	1.17335	1.12037	0.921006	1.29736	0.634468	1.08472	0.422726	0.835398			0.939078	0.0876061
51	1.28161	1.36476	0.670631	0.731749	1.10439	1.16768	0.846501	1.18303	1.46321	1.03188	0.615387	0.772865			1.01947	0.0862158
52.5	0.978626	0.805359	0.679033	0.579973	1.03543	1.09135	0.912079	1.16122	0.913316	0.979047	0.808048	0.710332			0.887817	0.0529144
54	1.02759	1.0015	0.687434	0.724799	1.02068	1.01466	1.04377	1.2237	1.07124	1.01574	0.686991	0.715138			0.936105	0.0547158
55.5	1.07656	1.19763	0.803302	0.869624	1.00594	0.937977	1.11877	1.41256	1.22917	1.03374	0.565935	0.719944			0.997596	0.0709575
57	1.21693	1.13587	0.877191	0.870607	1.10718	1.08168	1.04696	1.60141	1.19914	1.09458	0.749535	0.776296			1.06311	0.0700047
58.5	0.973382	0.797933	0.95108	0.871589	1.103	1.09309	0.975146	1.57474	1.22575	1.10524	1.03661	0.832648			1.04502	0.0628328
60	0.984381	0.981633	0.968227	1.00234	1.09881	1.10451	1.07381	1.26229	1.45065	1.11589	1.09082	0.796259			1.07747	0.0490222

## Sheet: 2S1H-I
	HFS laser EC to AC alone														LTP Curve				Piared t-test
Time (min)	RecSite1	RecSite2	RecSite3	RecSite4	RecSite5	RecSite6	RecSite7	RecSite8	RecSite9	RecSite10	RecSite11	RecSite12			mean	sem			before	after
-22.5	0.89977	0.919273	1.00853	1.05699	0.994062	0.95181	1.30699	1.33431	0.896661	1.01115	1.07007	1.05283			1.04187	0.0431901		RecSite1	1.01324	0.965066
-21	0.94602	1.05176	1.01833	0.972061	1.02832	0.938703	1.00007	0.940088	1.00261	1.1139	0.997568	1.06709			1.00638	0.0162257		RecSite2	1.0587	1.09639
-19.5	1.0161	1.01564	0.93697	0.916228	1.06259	0.925595	0.605469	0.981341	1.10856	1.01419	1.05914	0.895432			0.961438	0.0391569		RecSite3	0.994155	1.1179
-18	1.03425	1.20028	1.00156	0.993561	1.0541	0.93343	1.02084	1.0226	0.969127	0.914483	1.0388	0.964412			1.01229	0.0220552		RecSite4	1.00254	1.12547
-16.5	1.05241	1.17307	1.06615	1.07089	1.01675	0.983954	0.793153	0.758707	0.829693	0.935064	1.01845	1.03339			0.97764	0.037738		RecSite5	0.985011	1.63839
-15	1.09127	1.14356	0.964168	1.00702	1.0318	1.03448	1.36627	0.660296	0.935583	0.91987	1.04126	1.13996			1.02796	0.0501656		RecSite6	1.01698	1.51141
-13.5	1.02343	1.11406	0.931755	1.07887	1.04686	1.0821	0.687963	0.561885	0.902032	0.931553	1.06407	1.0913			0.959657	0.0522137		RecSite7	0.969613	1.03364
-12	0.955591	1.02075	1.02985	0.981634	0.98871	1.12972	0.5963	0.602213	1.00792	0.959204	0.91804	1.02174			0.934305	0.0497033		RecSite8	0.882635	1.10113
-10.5	1.11276	1.11324	1.04204	1.0142	0.968094	1.03839	0.793998	0.896955	1.11381	0.986855	1.15011	1.05119			1.02347	0.0307916		RecSite9	1.00029	0.830322
-9	1.01557	1.04755	1.05424	0.991009	0.947479	0.947065	1.20417	1.1917	1.06798	1.04549	0.936837	0.945712			1.0329	0.027297		RecSite10	0.971329	0.860871
-7.5	0.953592	0.981867	1.05608	1.06257	0.952945	1.03257	1.08623	1.16804	1.09845	1.07118	0.859665	0.938271			1.02179	0.0258826		RecSite11	1.00481	1.00071
-6	0.891611	1.03936	1.0211	1.03767	0.958411	1.11808	0.968293	1.14439	1.12667	1.05121	0.961302	0.93083			1.02074	0.0244737		RecSite12	1.02252	1.01555
-4.5	1.05394	1.0482	0.986129	1.01277	0.979433	0.978748	1.11197	0.813543	0.969281	0.962299	1.06294	1.0525			1.00265	0.0227753
-3	1.0173	1.05704	0.928095	0.919808	0.98527	0.929133	1.25564	0.892948	0.890586	0.892814	0.89133	1.03541			0.974615	0.0322691
-1.5	1.0173	1.02133	0.928095	0.919808	0.991107	0.879518	0.625286	0.894384	0.890586	0.892814	1.1625	1.01832			0.936754	0.0386463			t=1.644, df=11, p=0.1283, n=12
--	0	0	0	0	0	0	0	0	0	0	0	0			0	0
--	0	0	0	0	0	0	0	0	0	0	0	0			0	0
--	0	0	0	0	0	0	0	0	0	0	0	0			0	0
1.5	1.12573	1.20006	1.06123	1.11056	1.36613	1.43895	0.929576	0.840275	0.99018	1.01075	0.9969	1.03264			1.09191	0.0521367
3	1.05559	1.21699	1.06123	1.11056	1.27551	1.22795	1.24103	1.30157	1.03991	0.971302	1.13043	0.986546			1.13488	0.0345378
4.5	1.14984	1.23393	1.07644	1.06205	1.22462	1.18855	1.21432	1.4064	0.872367	0.931851	1.08142	1.08595			1.12731	0.0430664
6	1.11266	1.22604	1.09164	1.12299	1.19169	1.19949	1.24728	1.51123	0.826977	0.939845	1.03241	1.07668			1.13158	0.0513526
7.5	1.07548	1.29472	1.119	1.18394	1.24849	1.21043	1.15404	1.02534	0.910831	0.947838	1.02763	1.03658			1.10286	0.0359938
9	1.12808	1.29274	1.12322	1.09244	1.3053	1.2717	0.708312	0.671985	0.994686	1.05303	1.14415	1.09776			1.07362	0.0612323
10.5	1.12566	1.29076	1.12744	1.1204	1.45184	1.37631	0.777032	0.837216	1.07713	1.0319	1.0795	1.10019			1.11628	0.0585016
12	1.12324	1.19793	1.13389	1.14836	1.31382	1.22263	0.709866	0.718636	0.928983	1.01077	1.0014	1.02991			1.04495	0.0565905
13.5	1.14817	1.22351	1.10332	1.05068	1.37888	1.33927	0.688255	0.600057	0.867497	0.991104	0.987276	0.959638			1.02814	0.071053
15	1.01162	1.05837	1.07276	1.06716	1.44393	1.4559	1.03014	0.580393	0.830867	0.968721	0.854812	0.970029			1.02873	0.0725512
16.5	1.05127	1.10311	1.15634	1.10777	1.35041	1.23332	1.37203	1.38277	0.899579	0.946338	0.973332	1.07944			1.13798	0.0500413
18	1.09092	1.14785	1.13351	1.05429	1.2923	1.21046	1.22741	1.15427	0.968291	1.0004	0.959212	1.03714			1.10634	0.032077
19.5	1.15433	1.1996	1.11069	1.05863	1.2342	1.22767	1.08278	0.925766	1.04039	1.01958	1.01326	0.994844			1.08848	0.029691
21	1.04633	1.13382	1.12622	1.06298	1.44099	1.24489	0.942532	0.948271	0.939247	1.03876	1.06731	1.07212			1.08862	0.0427415
22.5	0.938322	1.06804	1.07661	1.07374	1.37629	1.28866	1.05711	0.970777	0.895662	0.933437	1.07927	1.09363			1.07096	0.0425156
24	1.01103	1.1044	1.01781	1.08449	1.61508	1.44209	1.10648	1.36234	0.971291	0.979189	1.09124	1.11514			1.15838	0.0614354
25.5	1.03572	1.24839	1.03286	1.04792	1.47561	1.36366	1.15586	1.26896	0.995141	1.02494	1.05251	1.0581			1.14664	0.047253
27	1.06041	1.20162	1.04792	1.03806	1.54947	1.41035	1.27263	0.576378	0.848041	0.917147	1.02066	1.09395			1.08639	0.0772345
28.5	1.05871	0.987197	1.18179	1.05056	1.62333	1.45703	1.38939	1.33654	0.82764	0.94445	1.07112	1.05756			1.16544	0.0712475
30	1.05702	1.04351	1.17918	1.06307	1.54244	1.50437	0.835489	0.849307	0.957013	0.971753	0.85156	1.04874			1.07529	0.0703398
31.5	0.980509	1.06512	1.07972	1.12103	1.46451	1.35962	1.21203	1.3215	1.08639	0.987018	0.908403	1.03991			1.13548	0.051135
33	0.917914	1.08674	1.00604	1.12653	1.38657	1.21486	1.36091	1.48264	0.894359	1.00228	1.02368	1.0474			1.12916	0.0577031
34.5	0.962588	1.22567	1.03612	1.03593	1.41245	1.28996	1.12794	1.19328	0.875455	0.98156	1.09931	1.03228			1.10605	0.0458752
36	1.08886	1.09183	1.06619	1.19384	1.54313	1.36505	0.894964	0.903919	0.85655	0.960838	1.06832	1.01664			1.08751	0.0604367
37.5	0.905746	1.1124	1.06872	1.12529	1.44337	1.33787	1.05185	0.938017	1.08224	1.03366	1.03734	0.98919			1.09381	0.0466226
39	1.02543	1.13296	1.07124	1.11729	1.56048	1.55302	0.868702	1.0629	1.03726	0.95956	0.867529	1.03407			1.10754	0.0681079
40.5	1.07412	1.13891	1.18176	1.10928	1.67758	1.41499	1.04513	0.71906	0.992275	1.02534	1.00944	1.07896			1.12224	0.07099
42	1.08221	1.00734	1.17787	1.13468	1.55274	1.27696	1.22156	0.889701	1.01937	1.01415	0.99558	1.11158			1.12365	0.0521964
43.5	1.0903	1.10235	1.17398	1.16008	1.51739	1.2701	0.958084	1.06034	1.04646	1.00297	0.981719	1.08178			1.12046	0.0459627
45	0.996169	1.11615	1.11042	1.17496	1.48204	1.26324	0.859613	0.803579	1.06369	1.01237	1.15117	1.05197			1.09045	0.0536169
46.5	0.902037	1.12996	1.12911	1.18901	1.74846	1.54106	0.761142	0.89173	1.04112	1.02177	1.08792	1.07841			1.12681	0.0825059
48	0.984712	1.22865	1.14781	1.10594	1.3507	1.5097	1.03663	0.979881	0.807305	0.978681	1.04693	1.02843			1.10045	0.0567464
49.5	0.936896	1.08654	1.03606	1.12644	1.76448	1.47834	1.26656	1.41295	0.85316	0.935588	1.00595	1.03342			1.16136	0.0812087
51	0.988814	1.00933	1.11931	1.14694	1.6721	1.58452	0.931494	0.933549	0.910462	0.927226	1.08627	1.03234			1.11186	0.0766105
52.5	1.04073	1.00801	1.1219	1.13403	1.6112	1.52758	1.09446	1.45247	0.817441	0.918684	0.994789	1.03125			1.14605	0.0752457
54	0.961343	1.00669	1.12449	1.12113	1.66018	1.47063	1.02811	1.08032	0.934323	0.907223	0.903307	1.01284			1.10088	0.0702177
55.5	0.956233	1.12782	1.02289	1.03222	1.67652	1.51316	0.961748	0.708179	0.901968	0.92273	0.979647	0.990212			1.06611	0.0808574
57	0.951123	1.05338	1.13549	1.09138	1.72415	1.5365	1.0355	1.29791	1.01872	0.998404	1.05599	0.967588			1.15551	0.0732093
58.5	0.959963	1.13708	1.18368	1.13101	1.72703	1.49638	0.838263	0.77817	1.01872	0.998404	0.949167	1.02445			1.10353	0.0811358
60	0.968804	1.17642	1.15827	1.17658	1.44913	1.45626	1.38248	1.47617	0	0	0.897091	0.956559			1.00815	0.154356

## Sheet: 2S1J-K
	HFS laser EC to AC alone										LTP Curve				Piared t-test
Time (min)	RecSite1	RecSite2	RecSite3	RecSite4	RecSite5	RecSite6	RecSite7	RecSite8			mean	sem			before	after
-22.5	0.665759	1.2756	1.22668	1.18916	1.00487	0.802765	0.977601	0.84194			0.998046	0.0832031			1.10768	0.812194
-21	1.04482	1.04945	1.06106	1.00268	1.19476	1.05114	0.999319	0.919336			1.04032	0.0293603			1.06999	0.77486
-19.5	1.32109	0.823307	0.940229	0.974647	1.04594	1.29951	0.930606	0.891722			1.02838	0.070051			0.99786	0.628725
-18	1.03246	0.752925	0.806579	0.820547	0.897115	1.27664	0.861893	0.864108			0.914033	0.0634463			1.00106	0.730085
-16.5	1.2584	1.05072	0.760174	0.813224	0.764123	0.643029	0.905423	0.792738			0.873478	0.0740448			0.987613	0.638564
-15	1.19173	1.37456	0.771323	0.805901	0.897634	0.734309	0.783602	0.871763			0.928852	0.0869986			0.995633	0.768398
-13.5	1.137	1.07648	1.04879	1.02542	1.0981	0.701842	1.05726	0.950787			1.01196	0.051651			1.02861	0.747022
-12	1.08228	1.07394	0.912755	0.927771	0.892946	1.0843	1.16891	1.14906			1.0365	0.0413373			1.05679	0.841646
-10.5	1.20134	1.38307	0.789998	0.88952	1.06535	1.16701	0.96199	0.860837			1.03989	0.0761083
-9	0.906912	0.97538	1.06017	1.09246	1.23776	1.24973	1.1637	1.05411			1.09253	0.0455286
-7.5	1.29554	0.77551	0.934814	0.95845	0.9276	0.848111	1.00989	1.24738			0.999662	0.0690048			t=15.33, df=7, p<0.0001, n=8
-6	1.06353	0.885536	0.884267	0.905433	1.10382	1.18638	0.856073	0.906955			0.973999	0.0471547
-4.5	1.17606	1.2846	1.13266	1.08315	0.953226	1.03654	1.03962	1.17402			1.10998	0.0391516
-3	1.28859	1.18319	1.23319	1.13378	0.884304	0.994882	1.22317	1.17567			1.1396	0.0509694
-1.5	0.733843	0.687594	1.21063	1.1887	0.815383	0.953223	1.02189	1.17732			0.973573	0.0796699
--	0	0	0	0	0	0	0	0			0	0
--	0	0	0	0	0	0	0	0			0	0
--	0	0	0	0	0	0	0	0			0	0
1.5	0.93928	0.908086	1.18201	1.18871	0.56851	0.826875	0.794734	0.663138			0.883918	0.0838903
3	0.938532	0.493798	1.19466	1.17666	0.660295	0.777524	0.712226	0.605961			0.819956	0.0982259
4.5	0.937784	0.359907	1.21502	1.18026	0.720942	0.742711	0.629718	0.548783			0.791891	0.113445
6	0.817153	0.357864	1.20924	1.20232	0.592878	0.792454	0.661849	0.498841			0.766575	0.11684
7.5	0.701569	0.35582	1.1754	1.1713	0.638903	0.747749	1.02618	0.898316			0.839405	0.107177
9	0.932014	0.293804	1.12752	1.11374	0.714057	0.827495	1.03884	1.00913			0.882073	0.104431
10.5	0.949644	1.01762	1.07964	1.05617	0.789211	0.822017	0.645529	0.537379			0.862152	0.0750653
12	0.967273	0.816244	0.944451	0.937366	0.697134	0.816539	0.725923	0.548458			0.806674	0.0548168
13.5	0.772087	0.614865	0.965656	1.0011	0.689207	0.856518	0.806318	0.559538			0.783161	0.0595904
15	0.867421	0.860497	0.897846	0.915524	0.658213	0.827428	0.494975	0.846346			0.796031	0.0547803
16.5	0.962756	1.10613	0.798657	0.756594	0.767514	0.867889	0.65455	0.795402			0.838686	0.0528684
18	0.886917	0.558975	0.590518	0.690109	0.79543	0.854518	0.814126	0.744458			0.741881	0.0453695
19.5	0.888314	0.823332	0.563558	0.660962	0.747049	0.841146	0.95753	0.854846			0.792092	0.0485294
21	0.841885	0.939666	0.536599	0.631815	0.698667	0.753682	1.10093	0.965235			0.80856	0.0712309
22.5	1.03765	1.04119	0.730871	0.786118	0.6493	0.772521	1.03284	0.728317			0.847352	0.061363
24	0.904128	1.14272	1.04173	1.07825	0.599933	0.79136	0.519615	0.491399			0.821142	0.0984091
25.5	0.770606	0.370302	0.9236	1.03098	0.658101	0.738597	0.864855	0.674989			0.754004	0.0757205
27	0.709124	0.476845	0.805465	0.983702	0.632435	0.636373	0.644426	0.477882			0.670781	0.0631971
28.5	0.647641	0.583387	0.781853	0.855706	0.57115	0.650767	0.863477	0.719195			0.709147	0.0435033
30	0.629559	0.525075	0.75824	0.727709	0.584079	0.665162	1.08253	0.960507			0.741607	0.0720987
31.5	0.62814	0.466763	0.779445	0.733561	0.597008	0.70235	1.0051	0.986149			0.737315	0.0701957
33	0.696737	0.744885	1.07561	0.822328	0.757701	0.825656	0.640598	0.585601			0.76864	0.0564451
34.5	0.765335	1.16948	0.893634	0.911096	0.59306	0.735454	0.531181	0.515063			0.764288	0.0844032
36	0.90395	1.13809	0.879064	0.911142	0.513335	0.692814	0.749606	1.01213			0.850016	0.073527
37.5	0.787191	0.917351	0.838956	0.62966	0.661669	0.650174	0.968031	0.982408			0.80443	0.0548471
39	0.670432	0.69661	0.798849	0.883722	0.583193	0.64419	0.791488	0.769264			0.729718	0.0370524
40.5	0.642766	0.813128	0.749415	0.78834	0.504717	0.638207	0.862465	0.907917			0.738369	0.0507334
42	0.879465	0.929647	0.703346	0.744047	0.634555	0.693421	0.820318	0.817051			0.777731	0.0380824
43.5	1.00654	0.884709	0.611787	0.703825	0.777968	0.695727	0.738214	0.695779			0.764318	0.0474576
45	0.739676	0.839771	0.839144	0.871131	0.58748	0.698032	0.656109	0.574507			0.725731	0.0439851
46.5	0.835997	0.530495	0.609956	0.659302	0.611444	0.667859	0.855037	0.869193			0.70491	0.049143
48	0.935289	0.810844	0.604997	0.729509	0.635408	0.637686	0.570517	0.734056			0.707288	0.0458702
49.5	0.926447	1.09119	0.576376	0.672816	0.51074	0.771888	0.533706	0.600092			0.710407	0.0779963
51	0.84478	0.681962	0.547756	0.616123	0.553622	0.811476	0.52068	0.961702			0.692263	0.0615312
52.5	0.74008	0.687983	0.731738	0.844916	0.596505	0.851063	0.507654	0.897532			0.732184	0.0505116
54	0.775394	0.694004	0.569993	0.642297	0.644616	0.876443	0.961214	0.833362			0.749666	0.0507969
55.5	0.687751	0.997989	0.767344	1.07612	0.740802	0.805724	1.04928	0.945391			0.8838	0.0570971
57	0.996841	1.15733	0.569234	0.649565	0.768022	0.836291	0.949182	1.05742			0.872986	0.0770054
58.5	0.703642	0.628649	0.626363	0.686591	0.693137	0.753947	0.849085	0.873702			0.72689	0.0350738
60	0.675724	0.468145	0.683491	0.723617	0.631342	0.671604	0.673863	0.644005			0.646474	0.0291355

[truncated: 5 more sheets: 2S1L-M, 2S1N-O, 2S1P-Q, 2S1R-S, 2S1V-W]
