# Supplementary material for: Heterosynaptic plasticity of the visuo-auditory projection requires cholecystokinin released from entorhinal cortex afferents
Source: eLife. 2024 Mar 4;13:e83356. doi: 10.7554/eLife.83356 (PMC10954309; doi:10.7554/eLife.83356)
Supplement: Figure 3—source data 1. [file elife-83356-fig3-data1.xlsx]

## Sheet: 3G-to-I
	HFS laser EC to AC + Pre/Post Pairing										HFS laser VC to AC + Pre/Post Pairing													HFS EC to AC + Pre/Post Pairing				HFS laser VC to AC + Pre/Post Pairing				two-way RM Anova
Time (min)	Cell1	Cell2	Cell3	Cell4	Cell5	Cell6	Cell7	mean	sem		Cell1	Cell2	Cell3	Cell4	Cell5	Cell6	Cell7	mean	sem					before	after			before	after			ANOVA table	SS	DF	MS	F (DFn, DFd)	P value
-10	0.83922	0.974346	0.787729	0.93689	1.02886	1.14566	0.957984	0.952956	0.0482684		1.01946	1.02279	1.04915	0.957439	0.944736	0.741204	1.18747	0.988892	0.0551353				Cell1	1.03508	1.70635		Cell1	1	0.728516			Interaction	1.029	1	1.029	F (1, 12) = 13.16	P=0.0035
-9	0.856018	0.974346	0.855362	0.917372	0.96395	1.15483	1.02367	0.963649	0.0427259		1.01946	1.01434	0.969101	0.957439	1.09788	0.65884	0.991922	0.958426	0.0570789				Cell2	1	1.81809		Cell2	1	0.950486			Manipulation	0.9993	1	0.9993	F (1, 12) = 13.03	P=0.0036
-8	0.892613	1.07282	0.922995	0.917372	1.15484	0.733224	0.992427	0.955183	0.0554608		1.01005	1.0257	1.04482	1.04702	1.18919	0.697419	0.892782	0.986714	0.0629354				Cell3	0.998188	1.89798		Cell3	0.995085	1.09951			Time	1.151	1	1.151	F (1, 12) = 14.71	P=0.0024
-7	0.929207	1.09614	0.997259	0.93689	1.13345	1.02651	0.961188	1.01152	0.0322033		1.00065	1.04102	1.12054	1.03964	1.02446	0.650976	0.919312	0.970944	0.0625391				Cell4	0.931034	1.89427		Cell4	1	1.02152			Subject	0.9202	12	0.07668	F (12, 12) = 0.9800	P=0.5137
-6	1.04351	1.11946	1.07152	0.819779	1.11207	1.04484	1.01245	1.03195	0.041278		1.00822	1.00288	1.05664	1.00569	1.06686	1.16214	0.945843	1.03547	0.0279902				Cell5	1.08546	2.23785		Cell5	1	1.03538			Residual	0.9389	12	0.07825
-5	1.15781	1.02617	1.07683	0.819779	1.02842	0.879869	1.02527	1.00202	0.0470872		0.943214	1.03025	0.891106	0.971734	0.858485	0.806992	1.12797	0.947107	0.0443685				Cell6	0.910115	2.25283		Cell6	1	1.2206
-4	1.17225	0.932884	1.09274	0.888094	1.07644	0.678232	0.967596	0.972605	0.066765		1.00592	0.97657	0.863574	1.0088	1.12579	1.36726	1.0193	1.05246	0.0647829				Cell7	0.995551	0.67139		Cell7	1	1.09352			Bonferroni comparison
-3	1.18669	0.906971	0.763858	0.956409	1.1452	0.971522	0.990024	0.988668	0.0582775		1.06863	0.960981	0.836041	1.01327	1.03577	1.10954	0.910622	0.990693	0.0387122													HFS Laser EC to AC + Pre/Post Pairing before vs after	p=0.0004
-2	1.13676	0.881057	1.20414	1.02472	1.11887	0.733224	1.01245	1.01589	0.0664206		0.962196	0.962149	0.985306	1.01775	0.82304	1.40281	0.9718	1.01786	0.0736975													HFS laser VC to AC + Pre/Post Pairing before vs after	p>0.9999
-1	1.13676	1.01581	1.20944	1.09304	1.09253	0.733224	1.01245	1.04189	0.0621549		0.962196	0.963318	1.13457	0.981212	0.833783	1.40281	1.03298	1.04441	0.0742378													HFS Laser EC to AC + Pre/Post Pairing before vs HFS laser VC to AC + Pre/Post Pairing before	p>0.9999
	0	0	0	0	0	0	0	0	0		0	0	0	0	0	0	0	0	0													HFS Laser EC to AC + Pre/Post Pairing after vs HFS laser VC to AC + Pre/Post Pairing after	p<0.0001
	0	0	0	0	0	0	0	0	0		0	0	0	0	0	0	0	0	0
	0	0	0	0	0	0	0	0	0		0	0	0	0	0	0	0	0	0														mean	std	n	sem
1	1.94694	1.51335	1.61259	1.46389	1.58537	1.61309	0.935557	1.5244	0.123426		0.811488	0.949338	0.990799	0.827629	1.03179	1.44582	1.20494	1.0374	0.0912682													HFS Laser EC to AC + Pre/Post Pairing before	0.9936	0.054915	7	0.0207559
2	2.05207	0.953615	1.67359	1.46389	1.58537	1.87889	0.935557	1.50614	0.175113		0.811488	0.946015	1.0492	0.896741	1.02336	1.44582	1.20494	1.05394	0.0869981													HFS laser VC to AC + Pre/Post Pairing before	0.9993	0.00171987	7	0.000650049
3	2.08028	1.56517	1.73459	1.46389	2.3824	2.14468	1.14061	1.78738	0.178156		0.822885	0.948186	1.1076	1.01892	1.01492	1.27271	1.03833	1.03194	0.0564987
4	2.10849	1.51335	1.8566	1.52245	1.55417	1.68642	1.01245	1.6077	0.138674		0.834283	0.950356	1.16593	0.886818	1.0986	1.24384	1.19022	1.05286	0.0658435													HFS Laser EC to AC + Pre/Post Pairing after	1.783	0.492228	7	0.186045
5	1.95322	1.1091	1.7399	1.581	2.46274	2.25466	0.95478	1.7222	0.227936		0.707517	0.943156	1.22425	0.819633	1.14708	1.26622	1.18737	1.04217	0.0892496													HFS laser VC to AC + Pre/Post Pairing after	1.021	0.142422	7	0.0538304
6	1.8313	1.15056	1.71338	1.46389	2.77284	2.46088	1.06372	1.77951	0.261703		0.642685	0.951734	1.14296	0.795006	1.18494	1.3807	1.09195	1.02714	0.102048
7	1.80755	1.17129	1.87782	1.60052	2.86371	2.48609	1.17265	1.85423	0.259077		0.773469	0.963469	1.03002	0.770379	1.19061	1.25047	0.996528	0.99642	0.0755107
8	1.78379	1.05727	2.11918	1.75667	2.95457	2.51129	1.12779	1.90151	0.282566		0.668897	0.975205	1.03751	0.78831	1.18017	1.12024	0.989202	0.965649	0.0736434
9	1.73007	1.06763	2.23986	1.71763	2.73422	2.05303	1.1342	1.81095	0.242713		0.720226	0.968025	1.24155	0.82644	1.16973	1.08827	0.981877	0.999447	0.0754053
10	1.67634	1.05727	2.23405	1.44437	2.62249	2.12635	1.14061	1.75736	0.240767		0.771556	0.944747	0.99405	0.895287	1.05432	1.36464	1.08733	1.01599	0.0760097
11	1.74329	1.09873	2.22825	1.62004	2.62035	1.90638	1.06372	1.75439	0.231098		0.634977	0.951173	1.0852	1.03701	0.965521	1.09019	1.19278	0.993837	0.0727391
12	1.81023	1.3475	2.17487	1.40534	2.69882	2.18134	0.929149	1.79247	0.247905		0.634595	0.966277	1.17636	1.02516	1.04348	1.42581	1.08562	1.05104	0.0969956
13	2.0068	0.94325	2.23853	1.87378	2.61013	2.273	0.794582	1.82001	0.281989		0.634212	0.968806	1.25475	1.09692	0.941246	1.4717	1.07997	1.06395	0.107082
14	1.53807	1.11946	2.24715	1.87378	2.7288	1.99804	1.01245	1.78825	0.25046		0.816927	0.971335	1.27757	1.16869	0.994231	1.51759	1.07433	1.11724	0.0938501
15	1.77239	0.94325	2.18714	1.85426	2.64441	1.72308	1.12139	1.74942	0.238581		0.734302	0.964194	1.1452	1.15833	1.04722	1.24968	1.24076	1.0771	0.0743409
16	2.0067	1.54444	2.12713	1.44437	2.6898	2.01637	1.0509	1.83996	0.21922		0.654739	0.966499	1.01284	1.09925	1.04985	1.52269	1.043	1.04984	0.104149
17	1.61722	1.46152	1.89904	1.8933	2.71968	2.4838	0.980412	1.86499	0.242787		0.751275	0.950832	0.959655	1.04017	0.935166	1.5687	1.16121	1.05243	0.105659
18	1.47912	1.52371	1.68685	2.02993	2.79463	2.50671	0.813806	1.83354	0.27378		0.847812	0.966396	0.940422	0.823844	0.971898	1.55943	1.08198	1.0274	0.101938
19	1.49245	2.06789	1.8566	2.18608	2.49672	2.52962	0.80099	1.91862	0.249215		0.683574	0.940555	0.975313	1.16482	1.00863	1.55015	1.1743	1.07105	0.109192
20	1.50579	2.05494	1.93617	1.93234	2.54198	1.92471	1.0509	1.84955	0.189858		0.818977	0.950433	1.0102	1.01007	1.07574	1.42644	1.18251	1.06777	0.0789134
21	1.60482	2.04198	2.01043	1.67859	2.41911	2.28216	0.80099	1.83401	0.221194		0.691199	0.942641	1.19997	1.15383	1.04539	1.33714	1.22573	1.08513	0.0879151
22	1.81775	1.47188	1.87782	1.581	2.32635	2.63961	0.967596	1.81172	0.225826		0.685678	0.939937	1.09196	1.102	1.04245	1.29435	1.26894	1.06076	0.0843596
23	1.53232	1.35786	1.8513	2.00065	2.30831	2.30966	0.829826	1.74142	0.220187		0.680157	0.937232	0.983954	1.07089	1.03952	1.25156	1.03306	0.999482	0.0702095
24	1.44949	2.06271	1.82477	2.108	2.29168	2.12635	0.847448	1.81578	0.20691		0.678545	0.941134	1.11332	1.0015	1.01246	1.16074	1.05676	0.994921	0.0642642
25	1.43575	1.97979	1.83008	2.05921	2.24923	2.51129	0.86507	1.8472	0.223565		0.676932	0.93644	1.11286	0.925331	0.98559	1.1164	1.17878	0.990333	0.0690794
26	1.43846	1.89686	1.95208	2.01041	2.24198	2.02553	0.788174	1.76479	0.201992		0.766417	0.955158	1.11239	1.15617	0.997659	1.23971	1.0132	1.03439	0.0630162
27	1.9191	2.00052	1.7452	2.02993	2.21594	1.99804	0.80099	1.81567	0.191398		0.839886	0.973876	1.00322	0.919857	1.00973	1.36302	0.978917	1.01264	0.0674852
28	2.13507	1.89686	1.99452	2.04945	2.19306	1.97054	0.813806	1.86476	0.193543		0.775874	0.957819	1.27068	1.02655	1.16602	1.28305	1.01834	1.07119	0.0742598
29	1.9593	1.46152	1.96269	1.82498	2.13896	2.40131	0	1.67839	0.324036		0.704155	0.95948	1.12581	0.962084	1.07368	1.08	1.05776	0.994711	0.0580713
30	1.77147	2.01088	1.93086	1.60052	1.9939	2.26383	0	1.65307	0.309292		0.786315	0.961142	0.980942	0.89696	0.981354	1.08	1.10375	0.970067	0.0439042

## Sheet: 3J-to-L
	HFLSEA										HFLSVA												HFLSEA				HFLSVA				two-way RM Anova
Time (min)	Cell1	Cell2	Cell3	Cell4	Cell5	Cell6	Cell7	mean	sem		Cell1	Cell2	Cell3	Cell4	Cell5	Cell6	Cell7	mean	sem				before	after			before	after			ANOVA table	SS	DF	MS	F (DFn, DFd)	P value
-10	1.04711	0.804546	0.834341	0.974889	1.07369	1.08165	1.036	0.978891	0.0467767		0.905474	1.12368	0.976334	0.991853	1.25022	0	0.972902	0.888638	0.166783			Cell1	1.0738	1.66786		Cell1	1	0.737943			Interaction	0.7193	1	0.7193	F (1, 12) = 10.54	P=0.0070
-9	0.979498	0.804546	0.798065	0.98966	0.877218	0.943796	1.04351	0.91947	0.0388154		1.03513	1.12368	1.0155	1.01108	1.29501	0.876707	0.976719	1.04769	0.0536838			Cell2	1	2.22918		Cell2	1	1.1855			Manipulation	0.7572	1	0.7572	F (1, 12) = 12.48	P=0.0041
-8	0.931841	0.871406	0.76179	1.00443	1.35022	0.901379	0.968435	0.969929	0.0754604		0.937872	1.06873	1.01578	1.03031	1.28283	0.876707	0.980535	1.02754	0.0527089			Cell3	0.93682	2.09205		Cell3	1	0.941334			Time	0.7145	1	0.7145	F (1, 12) = 10.47	P=0.0071
-7	1.03509	1.03633	0.758767	0.930576	0.859062	1.00742	0.964682	0.941704	0.0418136		1.114	1.05421	1.01606	1.05256	1.33451	0.962324	1.01953	1.07903	0.0497031			Cell4	0.971196	1.93275		Cell4	1	1.11298			Subject	0.728	12	0.06066	F (12, 12) = 0.8886	P=0.5793
-6	0.909109	1.06307	0.76179	0.937962	1.00978	0.954401	0.960928	0.942435	0.0384915		1.01878	1.03968	0.963877	1.00575	0.94407	1.04233	1.02222	1.00524	0.0153536			Cell5	1.00862	1.02626		Cell5	1	0.770177			Residual	0.8192	12	0.06827
-5	1.08782	1.06976	0.979444	0.945347	1.18534	1.15589	0.994711	1.05976	0.0371443		0.952447	0.961789	0.989759	0.992023	0.942782	1.05559	1.02491	0.988471	0.0166197			Cell6	0.973489	1.19274		Cell6	0.9	1.16491
-4	1.14721	1.0341	1.00665	0.945347	1.12266	0.986214	1.00034	1.03465	0.0301382		0.899814	0.941466	1.01564	0.978299	0.947787	1.06884	0.996222	0.978296	0.0225842			Cell7	0.997151	1.30063		Cell7	1.00271	0.982408			Bonferroni comparison
-3	1.18688	0.993983	1.10036	1.09306	0.76009	0.922587	1.00597	1.00899	0.0569389		0.987222	0.832702	1.01843	0.962825	0.731222	1.12551	1.0053	0.951887	0.0531484												HFS Laser EC to AC + Pre/Post Pairing before vs after	p=0.0013
-2	1.20672	1.14776	1.12152	0.945347	1.05504	0.890774	1.01348	1.05438	0.0461771		1.07463	0.927029	1.02121	0.987653	0.593126	0.995996	1.01438	0.944861	0.0658247												HFS laser VC to AC + Pre/Post Pairing before vs after	p>0.9999
-1	1.20672	1.1745	1.24547	0.945347	0.793101	0.890774	0.98345	1.03419	0.0713465		1.07463	0.927029	0.967407	0.987653	0.678442	0.995996	1.01438	0.949363	0.0521169												HFS Laser EC to AC + Pre/Post Pairing before vs HFS laser VC to AC + Pre/Post Pairing before	p>0.9999
	0	0	0	0	0	0	0	0	0		0	0	0	0	0	0	0	0	0												HFS Laser EC to AC + Pre/Post Pairing after vs HFS laser VC to AC + Pre/Post Pairing after	p=0.0001
	0	0	0	0	0	0	0	0	0		0	0	0	0	0	0	0	0	0
	0	0	0	0	0	0	0	0	0		0	0	0	0	0	0	0	0	0													mean	std	n	sem
1	1.80133	1.17896	1.67775	1.35894	0.708765	1.11347	1.00597	1.2636	0.155785		0.808182	1.0454	0.792804	0.996553	0.766813	1.31676	0.954001	0.954359	0.0788894												HFS Laser EC to AC + Pre/Post Pairing before	0.99444	0.0393459	7	0.0148714
2	1.76432	0.949409	1.71629	1.21123	0.682326	1.13998	1.00597	1.20993	0.163		0.780923	1.12387	0.977095	1.01826	0.766813	1.31676	0.940776	0.989214	0.0784581												HFS laser VC to AC + Pre/Post Pairing before	0.986101	0.0351632	7	0.0132904
3	1.72731	1.0497	1.75484	1.06352	0.655887	1.16649	1.036	1.20768	0.162513		0.788354	1.20233	0.97187	1.15801	0.805606	1.36865	0.978751	1.03908	0.0873916
4	1.72041	1.02741	1.83192	1.09306	0.737492	1.35737	1.02099	1.25552	0.163343		0.750271	1.14757	0.966645	1.0595	0.68941	1.1001	1.01672	0.961461	0.0717179												HFS Laser EC to AC + Pre/Post Pairing after	1.6345	0.43583	7	0.164728
5	1.71351	1.1745	1.7503	1.15214	0.863704	1.31495	1.29875	1.32398	0.128876		0.712188	1.20422	0.905503	1.05651	0.793571	1.22874	1.01493	0.987952	0.0800702												HFS laser VC to AC + Pre/Post Pairing after	0.985035	0.168203	7	0.0635747
6	2.00802	1.33497	1.81378	1.21123	0.989917	1.36797	1.26873	1.4278	0.145468		0.769717	1.25299	0.844361	1.03794	0.876642	1.35737	1.01314	1.02174	0.0885832
7	1.74764	1.10987	1.87727	1.06352	1.01116	1.27253	1.29875	1.34011	0.139306		0.677955	1.30177	1.03827	1.01938	0.889376	1.11273	0.902985	0.99178	0.0800174
8	1.71529	1.13885	2.29746	1.226	1.27824	1.1983	1.036	1.41288	0.181824		0.702748	1.20737	0.981732	1.03448	0.891723	1.2125	0.966494	0.999578	0.0728173
9	1.68294	1.26142	2.47279	1.38848	1.30238	1.4316	1.38884	1.56121	0.173126		0.735728	1.27846	0.945261	1.04959	0.868098	1.09598	1.03	1.00044	0.070778
10	1.73457	1.22353	2.54232	1.89069	1.04993	1.6649	1.12609	1.60458	0.214964		0.708526	1.34955	0.854638	1.12853	0.844473	1.14142	0.975208	1.00034	0.0896902
11	1.7862	1.28594	2.58464	1.56573	0.797482	1.36797	1.2462	1.51917	0.228601		0.681324	1.2398	0.816299	1.20747	0.837471	1.22824	0.920413	0.990146	0.0942833
12	1.71033	1.31937	2.20073	1.6839	1.06162	1.28314	1.36632	1.51791	0.154248		0.835407	1.24692	0.804102	1.2147	0.830469	1.31506	0.910317	1.02243	0.0920536
13	1.71665	1.21016	2.50907	1.50665	1.32575	1.1983	1.20867	1.52504	0.193726		0.853033	1.25403	0.791904	1.19435	0.753084	1.39725	0.933444	1.0253	0.103539
14	1.72297	1.43303	2.57104	1.59527	1.1088	1.4316	1.05852	1.56018	0.206671		0.843033	1.17619	1.0191	1.17399	0.746349	1.33143	1.04203	1.04745	0.0827501
15	1.82772	1.09204	2.56726	1.80207	1.23275	1.421	1.07354	1.57377	0.218934		0.833033	1.09834	0.78533	1.16958	0.707703	1.26561	1.02133	0.982991	0.0860893
16	1.6839	1.28371	2.56348	1.74298	1.31368	1.32556	1.00597	1.5599	0.207815		0.795408	1.10776	0.903254	1.19073	0.70255	1.30086	0.951969	0.99322	0.0882214
17	1.69715	1.46869	2.43349	1.24077	1.26363	1.23012	1.20116	1.505	0.182292		0.785092	1.12328	0.843669	1.12708	0.694968	1.33611	0.934221	0.977774	0.0926246
18	1.7104	1.92779	2.30351	2.0384	1.24957	1.33616	1.39635	1.70888	0.163099		0.72987	1.28998	0.856887	1.06343	0.804502	1.25823	0.916473	0.988482	0.0901408
19	1.75614	2.37798	2.21886	2.00886	1.25277	1.52704	1.01348	1.73645	0.205438		0.727238	1.24548	0.947787	1.15885	0.734792	1.22163	0.893395	0.989882	0.0901732
20	1.63437	2.48426	2.24909	1.44756	1.11357	1.47402	1.33629	1.67702	0.204678		0.7441	1.20098	1.03869	1.10505	0.834462	1.13386	0.884702	0.991692	0.0700281
21	1.55603	2.4946	2.38513	1.65436	1.13515	1.421	1.13359	1.68284	0.226032		0.760961	1.16621	1.02453	1.17991	0.693459	1.13583	0.922889	0.983398	0.0806513
22	1.50567	2.45698	2.37304	1.94978	1.11414	1.12407	1.29125	1.68785	0.233756		0.812723	1.13144	1.01038	1.07342	0.765083	1.13779	0.961075	0.98456	0.0605224
23	1.45424	2.41935	2.51209	1.77253	1.045	1.1983	1.40386	1.68648	0.236276		0.756075	1.2534	0.984016	1.07705	0.810833	1.11379	0.967064	0.994603	0.0706155
24	1.46187	2.16626	2.25816	1.41802	1.08588	1.21951	1.36257	1.56747	0.187385		0.699427	1.14031	1.01606	1.08068	0.73527	1.08979	0.973052	0.962083	0.071803
25	1.52882	2.31781	2.25816	1.6839	0.811754	1.27253	1.32128	1.59918	0.221534		0.699387	1.11433	0.894742	1.02343	0.708623	1.11547	1.0441	0.942869	0.0731052
26	1.62543	2.05483	1.98912	1.53619	1.04471	1.19035	1.30626	1.53527	0.157772		0.699347	1.10097	0.918894	1.10427	0.789706	1.22454	1.02839	0.980876	0.0765448
27	1.72204	2.30889	1.72007	1.65436	0.98187	1.10817	1.38884	1.55489	0.181745		0.690307	1.32139	0.943047	1.19563	0.716941	1.28008	1.03723	1.02637	0.104854
28	1.8646	2.19746	1.74274	2.45199	1.03197	1.26193	1.35881	1.70136	0.210584		0.681266	1.12717	0.944569	1.0788	0.810391	1.29187	0.942217	0.982326	0.0832227
29	1.97103	2.02808	1.76542	2.5757	0.998024	1.04984	1.29125	1.66848	0.237336		0.753734	1.29097	0.838548	1.15829	0.87355	1.18394	0.974031	1.01044	0.082692
30	1.98891	1.84756	1.91657	2.63063	1.01413	1.08165	1.14861	1.66115	0.245202		0.826202	1.2088	0.838548	1.15829	0.797914	1.07601	0.974031	0.982828	0.0687495
