# Supplementary material for: Heterosynaptic plasticity of the visuo-auditory projection requires cholecystokinin released from entorhinal cortex afferents
Source: eLife. 2024 Mar 4;13:e83356. doi: 10.7554/eLife.83356 (PMC10954309; doi:10.7554/eLife.83356)
Supplement: Figure 5—source data 1. [file elife-83356-fig5-data1.xlsx]

## Sheet: 5A
Response to VALS									two-way RM Anova
1hz-before	1hz-after	10hz-before	10hz-after	40hz-before	40Hz-after	80hz-before	80Hz-after
1.0488	1.1292	1.0372	1.0133	1.0373	1.1773	0.9447	1.126		df-Time*Freq	3
1.0611	0.918	1.0318	1.1562	0.9968	1.1894	0.9853	1.2513		df-error	34
1.0179	0.9609	0.9826	0.9882	0.974	1.0996	1.0821	1.5077		F-time*Freq	10.666
0.991	0.9026	0.9597	1.0243	1.0076	1.0842	1	1.0415		p	p<0.001
0.9709	0.9567	0.9523	1.0309	0.9592	1.0568	1.0251	1.2249
0.9989	1.0956	0.97	0.9944	0.9947	1.0721	0.9758	1.2015		Bonferroni comparison
0.9369	0.9278	0.9857	1.0872	0.9918	1.0902	0.9979	1.126		1Hz before vs after	p=0.352
0.988	0.9182	0.9588	1.1691	0.9878	1.0717	0.886	1.3364		10Hz before vs after	p=0.044
0.9604	0.8848					0.993	1.2921		40Hz before vs after	p=0.003
						0.9472	1.0099		80Hz before vs after	p<0.001
						1.0381	1.2017
						1.058	1.3418		1Hz before vs 10Hz before	p=1
						1.0483	1.028		1Hz before vs 40Hz before	p=1
									1Hz before vs 80Hz before	p=1
									10Hz before vs 40Hz before	p=1
									10Hz before vs 80Hz before	p=1
									40Hz before vs 80Hz before	p=1
									1Hz after vs 10Hz after	p=0.447
									1Hz after vs 40Hz after	p=0.052
									1Hz after vs 80Hz after	p<0.001
									10Hz after vs 40Hz after	p=1
									10Hz after vs 80Hz after	p=0.017
									40Hz after vs 80Hz after	p=0.208
									1Hz n	9
									1Hz before mean	0.9971
									1Hz before std	0.04028	sem	0.0134267
									1Hz after mean	0.966
									1Hz after std	0.08675	sem	0.0289167
									10Hz n	8
									10Hz before mean	0.9848
									10Hz before std	0.03282	sem	0.0116036
									10Hz after mean	1.058
									10Hz after std	0.07134	sem	0.0252225
									40Hz n	8
									40Hz before mean	0.9937
									40Hz before std	0.02306	sem	0.00815294
									40Hz after mean	1.1052
									40Hz after std	0.05007	sem	0.0177024
									80Hz n	13
									80Hz before mean	0.9986
									80Hz before std	0.05338	sem	0.0148049
									80Hz after mean	1.2068
									80Hz after std	0.14327	sem	0.0397359

## Sheet: 5B
Response to VALS													two-way RM Anova
minus65ms		10ms		85ms		235ms		535ms		885ms
before	after	before	after	before	after	before	after	before	after	before	after		df-Time*DelayOne	5
0.997305	1.0244	0.9447	1.126	0.986173	1.21621	1.09584	1.17506	0.987147	1.11066	1.01745	1.01962		df-error	59
0.999464	1.22156	0.9853	1.2513	1.04623	1.0529	1.05853	1.28791	0.989284	1.07751	1.0106	1.10296		F-time*DelayOne	7.115
1.00804	1.06723	1.0821	1.5077	1.01276	1.44297	0.947554	1.35235	1.00417	1.06626	0.948275	0.99255		p	p<0.001
0.959252	0.904151	1	1.0415	0.964301	1.04281	1.04736	1.04301	1.01841	1.15934	1.00049	1.08642
0.98945	1.0173	1.0251	1.2249	0.999947	1.11989	0.849517	1.11913	0.997252	1.12696	1.02655	1.03619		Bonferroni comparison
1.04819	1.04738	0.9758	1.2015	1.01535	1.18095	0.970693	1.04214	1.00835	0.982917	1.01581	0.979666		minus65ms before vs after	p=0.945
1.01752	1.0131	0.9979	1.126	0.955803	1.12586			0.97304	1.05754	0.986727	1.01261		10ms before vs after	p<0.001
0.990724	1.13637	0.886	1.3364	0.986012	1.10957			0.955106	1.18417	0.97957	1.0403		85ms before vs after	p<0.001
0.989384	1.00947	0.993	1.2921	0.96799	1.29649			1.00393	1.15684	1.00942	0.976404		235ms before vs after	p<0.001
1.04858	0.826687	0.9472	1.0099	1.03214	1.42364			1.00641	1.11476	0.967132	1.02594		535ms before vs after	p=0.003
1.00701	0.869701	1.0381	1.2017	1.03733	1.17735								885ms before vs after	p=0.385
0.978187	0.902973	1.058	1.3418	0.996806	1.18937
0.95402	0.974711	1.0483	1.028	0.973978	1.09963								minus65ms before vs 10ms before	p=1
													minus65ms before vs 85ms before	p=1
													minus65ms before vs 235ms before	p=1
													minus65ms before vs 535ms before	p=1
													minus65ms before vs 885ms before	p=1
													10ms before vs 85ms before	p=1
													10ms before vs 235ms before	p=1
													10ms before vs 535ms before	p=1
													10ms before vs 885ms before	p=1
													85ms before vs 235ms before	p=1
													85ms before vs 535ms before	p=1
													85ms before vs 885ms before	p=1
													235ms before vs 535ms before	p=1
													235ms before vs 885ms before	p=1
													535ms before vs 885ms before	p=1
													minus65ms after vs 10ms after	p<0.001
													minus65ms after vs 85ms after	p=0.001
													minus65ms after vs 235ms after	p=0.043
													minus65ms after vs 535ms after	p=0.457
													minus65ms after vs 885ms after	p=1
													10ms after vs 85ms after	p=1
													10ms after vs 235ms after	p=1
													10ms after vs 535ms after	p=0.443
													10ms after vs 885ms after	p=0.004
													85ms after vs 235ms after	p=1
													85ms after vs 535ms after	p=0.978
													85ms after vs 885ms after	p=0.012
													235ms after vs 535ms after	p=1
													235ms after vs 885ms after	p=0.221
													535ms after vs 885ms after	p=1
													minus65ms n	13
													minus65ms before mean	0.9901
													minus65ms before std	0.0283702	sem	0.00786848
													minus65ms after mean	1.00116
													minus65ms after std	0.108721	sem	0.0301538
													10ms n	13
													10ms before mean	0.998577
													10ms before std	0.0533773	sem	0.0148042
													10ms after mean	1.20683
													10ms after std	0.143271	sem	0.0397363
													85ms n	13
													85ms before mean	0.998064
													85ms before std	0.0292125	sem	0.00810209
													85ms after mean	1.19059
													85ms after std	0.127467	sem	0.035353
													235ms n	6
													235ms before mean	0.994916
													235ms before std	0.090502	sem	0.0369473
													235ms after mean	1.16993
													235ms after std	0.12825	sem	0.052358
													535ms n	10
													535ms before mean	0.994309
													535ms before std	0.0188226	sem	0.00595223
													535ms after mean	1.1037
													535ms after std	0.0595485	sem	0.0188309
													885ms n	10
													885ms before mean	0.996201
													885ms before std	0.0250899	sem	0.00793412
													885ms after mean	1.02727
													885ms after std	0.0419141	sem	0.0132544

## Sheet: 5C
Response to VALS													two-way RM Anova
0ms		50ms		200ms		400ms		800ms		Infinity
before	after	before	after	before	after	before	after	before	after	before	after		df-Time*DelayTwo	5
0.9447	1.126	0.982628	1.12402	1.01128	1.15405	0.933533	1.02925	1.01005	1.00914	0.971967	1.15062		df-error	51
0.9853	1.2513	0.971963	1.01197	0.955603	1.13991	0.975654	1.00981	1.04577	1.00931	0.991355	1.12107		F-time*DelayTwo	4.133
1.0821	1.5077	0.985448	1.08535	1.02098	1.01792	0.950057	1.07346	0.921587	0.946599	1.03785	1.12963		p	p=0.003
1	1.0415	0.995945	1.00807	0.969507	1.12711	0.955595	1.00028	1.00073	1.02743	1.0363	1.04861
1.0251	1.2249	1.0104	1.0905	1.0775	1.07015	1.03306	1.06811	0.964552	1.01046	0.964477	0.991435		Bonferroni comparison
0.9758	1.2015	0.971112	1.02333	1.00965	1.02942	1.00089	1.13769	0.970559	1.104	0.940494	1.04834		0ms before vs after	p<0.001
0.9979	1.126	1.00595	1.04697	1.07087	1.41941					1.01703	0.872472		50ms before vs after	p=0.001
0.886	1.3364	1.0153	1.28553	1.08813	1.0338					0.988876	0.888276		200ms before vs after	p=0.006
0.993	1.2921	1.02198	1.21075	0.992091	1.03913					1.05405	1.04053		400ms before vs after	p=0.073
0.9472	1.0099	1.01986	1.19206	1.03125	1.15043								800ms before vs after	p=0.454
1.0381	1.2017	0.991019	1.09323	0.975782	1.09715								∞ before vs after	p=0.363
1.058	1.3418			1.03387	0.998561
1.0483	1.028												0ms before vs 50ms before	p=1
													0ms before vs 200ms before	p=1
													0ms before vs 400ms before	p=1
													0ms before vs 800ms before	p=1
													0ms before vs ∞ before	p=1
													50ms before vs 200ms before	p=1
													50ms before vs 400ms before	p=1
													50ms before vs 800ms before	p=1
													50ms before vs ∞ before	p=1
													200ms before vs 400ms before	p=0.497
													200ms before vs 800ms before	p=1
													200ms before vs ∞ before	p=1
													400ms before vs 800ms before	p=1
													400ms before vs ∞ before	p=1
													800ms before vs ∞ before	p=1
													0ms after vs 50ms after	p=0.374
													0ms after vs 200ms after	p=0.374
													0ms after vs 400ms after	p=0.074
													0ms after vs 800ms after	p=0.01
													0ms after vs ∞ after	p=0.006
													50ms after vs 200ms after	p=1
													50ms after vs 400ms after	p=1
													50ms after vs 800ms after	p=1
													50ms after vs ∞ after	p=1
													200ms after vs 400ms after	p=1
													200ms after vs 800ms after	p=1
													200ms after vs ∞ after	p=1
													400ms after vs 800ms after	p=1
													400ms after vs ∞ after	p=1
													800ms after vs ∞ after	p=1
													0ms n	13
													0ms before mean	0.998577
													0ms before std	0.0533773	sem	0.0148042
													0ms after mean	1.20683
													0ms after std	0.143271	sem	0.0397363
													50ms n	11
													50ms before mean	0.997419
													50ms before std	0.0184753	sem	0.00557053
													50ms after mean	1.10653
													50ms after std	0.0897278	sem	0.0270539
													200ms n	12
													200ms before mean	1.01971
													200ms before std	0.0431371	sem	0.0124526
													200ms after mean	1.10642
													200ms after std	0.112941	sem	0.0326034
													400ms n	6
													400ms before mean	0.974798
													400ms before std	0.0367675	sem	0.0150103
													400ms after mean	1.0531
													400ms after std	0.051044	sem	0.0208386
													800ms n	6
													800ms before mean	0.985541
													800ms before std	0.0429271	sem	0.0175249
													800ms after mean	1.01782
													800ms after std	0.0505847	sem	0.0206511
													∞ n	9
													∞ before mean	1.00027
													∞ before std	0.0383215	sem	0.0127738
													∞ after mean	1.03233
													∞ after std	0.0999378	sem	0.0333126
