# Supplementary material for: Heterosynaptic plasticity of the visuo-auditory projection requires cholecystokinin released from entorhinal cortex afferents
Source: eLife. 2024 Mar 4;13:e83356. doi: 10.7554/eLife.83356 (PMC10954309; doi:10.7554/eLife.83356)
Supplement: Figure 6—source data 1. [file elife-83356-fig6-data1.xlsx]

## Sheet: 6B
BaselineVS	BaselineAS	PostVS	PostAS								two-way RM ANOVA
0.0706667	0.278	0.0865	0.4775	EC-AC_hM4Di_CNO							ANOVA table	DF	F (DFn, DFd)	P value
0.044	0	0.097	0.685	EC-AC_hM4Di_CNO							Interaction	5	F (5, 42) = 27.42	P<0.0001
0.122667	0.1105	0.184	0.691	EC-AC_hM4Di_CNO							Time	1	F (1, 42) = 273.5	P<0.0001
0.060667	0.022667	0.05	0.592	EC-AC_hM4Di_CNO							Manipulation	5	F (5, 42) = 32.52	P<0.0001
0.037333	0.214667	0.037333	0.551	EC-AC_hM4Di_CNO							Subject	42	F (42, 42) = 1.038	P=0.4518
0.1055	0.154667	0.0795	0.802	EC-AC_hM4Di_CNO							Residual	42
0.025333	0	0.054	0.814	EC-AC_hM4Di_CNO
0.112667	0.1075	0.110667	0.5395	VC-AC_hM4Di_CNO
0.142	0.0373333	0.101	0.702	VC-AC_hM4Di_CNO							Bonferroni comparison
0.0646667	0.1	0.138	0.6095	VC-AC_hM4Di_CNO							EC-AC_hM4Di_CNO-AS before vs after	p<0.0001
0.0485	0.138	0.014667	0.8095	VC-AC_hM4Di_CNO							VC-AC_hM4Di_CNO-AS before vs after	p<0.0001
0.061	0.039	0.0104	0.724667	VC-AC_hM4Di_CNO							GFP_CNO-AS before vs after	p<0.0001
0.033333	0.0565	0.0156	0.944	VC-AC_hM4Di_CNO							EC-AC_hM4Di_CNO-VS before vs after	p=0.9998
0	0.221	0.040933	0.553333	VC-AC_hM4Di_CNO							VC-AC_hM4Di_CNO-VS before vs after	p>0.9999
0.04	0.179333	0.3315	0.445	GFP_CNO							GFP_CNO-VS before vs after	p<0.0001
0.0206667	0.0295	0.2516	0.5075	GFP_CNO
0	0.0393333	0.495	0.690667	GFP_CNO
0.0493333	0.0186667	0.524	0.696	GFP_CNO
0.0855	0.0535	0.396	0.7065	GFP_CNO
0.091333	0.052	0.695	0.841333	GFP_CNO
0.0825	0.084	0.3705	0.608667	GFP_CNO
0.058	0.070667	0.631	0.878	GFP_CNO
0.2515	0.330667	0.572667	0.869	GFP_CNO
0.020667	0.025333	0.218667	0.654667	GFP_CNO

## Sheet: 6D
BaselineVS	BaselineAS	PostVS	PostAS						two-way RM ANOVA
0.0706667	0.2905	0.100667	0.187333	EC-AC_hM4Di_CNO					ANOVA table	DF	F (DFn, DFd)	P value
0.0333333	0.18	0.231333	0.248667	EC-AC_hM4Di_CNO					Interaction	5	F (5, 32) = 5.856	P=0.0006
0.0853333	0.174667	0.196667	0.311333	EC-AC_hM4Di_CNO					Time	1	F (1, 32) = 66.76	P<0.0001
0.153	0.114	0.1405	0.76	EC-AC_hM4Di_CNO					Column Factor	5	F (5, 32) = 10.04	P<0.0001
0.116	0.010667	0.025	0.997	EC-AC_hM4Di_CNO					Subject	32	F (32, 32) = 0.6065	P=0.9186
0.263333	0.047	0.178667	0.985	EC-AC_hM4Di_CNO					Residual	32
0.369	0.1965	0.2696	0.494	VC-AC_hM4Di_CNO
0.110667	0.1505	0.184667	0.591333	VC-AC_hM4Di_CNO
0.110667	0.1075	0.1465	0.471333	VC-AC_hM4Di_CNO					Bonferroni comparison
0.054	0.053	0.342	0.817	VC-AC_hM4Di_CNO					EC-AC_hM4Di_CNO-AS before vs after	p=0.0014
0.0295	0.122	0.0825	0.703333	VC-AC_hM4Di_CNO					VC-AC_hM4Di_CNO-AS before vs after	p<0.0001
0.0905	0.1	0.020667	0.889333	VC-AC_hM4Di_CNO					GFP_CNO-AS before vs after	p<0.0001
0.066667	0.198	0.087333	0.829333	VC-AC_hM4Di_CNO					EC-AC_hM4Di_CNO-VS before vs after	p>0.9999
0.0853333	0.097	0.485333	0.484667	GFP_CNO					VC-AC_hM4Di_CNO-VS before vs after	p=0.9986
0.102	0.066	0.231333	0.678	GFP_CNO					GFP_CNO-VS before vs after	p=0.0015
0.054	0.3605	0.294667	0.5175	GFP_CNO
0.108	0.101333	0.582667	0.975	GFP_CNO
0.0715	0	0.978667	0.7575	GFP_CNO
0.124667	0.094	0.635333	0.8405	GFP_CNO

## Sheet: 6S1B
BaselineVS	BaselineAS	PostVS	PostAS				two-way RM Anova
2.5	3.33	0	70	L365-260
6.67	3.33	0	50	L365-260			df-time*manipulation	3
0	0	0	80	L365-260			df-error	45
10	10	10	70	L365-260			F-time*manipulation	6.588
5	13.33	0	70	L365-260			p	p=0.001
3.33	10	0	80	L365-260
0	3.33	10	70	L365-260			Bonferroni comparison
6.67	3.33	0	50	L365-260			BaselineVS_ACSF vs PostVS_ACSF	p<0.001
0	10	30	50	ACSF			BaselineAS_ACSF vs PostAS_ACSF	p<0.001
0	10	10	80	ACSF			BaselineVS_ACSF vs BaselineAS_ACSF	p=1
3.33	0	20	70	ACSF			PostVS_ACSF vs PostAS_ACSF	p<0.001
6.67	30	20	80	ACSF
3.33	0	10	70	ACSF			BaselineVS_L365260 vs PostVS_L365260	p=1
3.33	0	20	80	ACSF			BaselineAS_L365260 vs PostAS_L365260	p<0.001
6.67	3.33	30	50	ACSF			BaselineVS_L365260 vs BaselineAS_L365260	p=1
6.67	10	40	60	ACSF			PostVS_L365260 vs PostAS_L365260	p<0.001
6.67	3.33	40	70	ACSF
							BaselineVS_ACSF vs BaselineVS_L365260	p=0.899
							BaselineAS_ACSF vs BaselineAS_L365260	p=0.678
							PostVS_ACSF vs PostVS_L365260	p<0.001
							PostAS_ACSF vs PostAS_L365260	p=0.962
								n	mean	std	sem
							BaselineVS_ACSF	9	4.07407	2.77778	0.925926
							BaselineVS_L365260	8	4.27083	3.49142	1.2344
							BaselineAS_ACSF	9	7.40741	9.54198	3.18066
							BaselineAS_L365260	8	5.83333	4.6291	1.63663
							PostVS_ACSF	9	24.4444	11.3039	3.76796
							PostVS_L365260	8	2.5	4.6291	1.63663
							PostAS_ACSF	9	67.7778	12.0185	4.00617
							PostAS_L365260	8	67.5	11.6496	4.11877

## Sheet: 6S1D
BaselineVS	BaselineAS	PostVS	PostAS			two-way RM Anova
3	3	63	63	CCK4
7	3	60	87	CCK4		df-time*manipulation	3
3	7	47	63	CCK4		df-error	36
3	7	30	67	CCK4		F-time*manipulation	17.631
3	7	30	47	CCK4		p	p<0.001
3	3	30	47	CCK4
3	0	33	47	CCK4		Bonferroni comparison
3	0	7	63	Saline		BaselineVS_Saline vs PostVS_Saline	p=1
3	0	10	73	Saline		BaselineAS_Saline vs PostAS_Saline	p<0.001
3	3	7	57	Saline		BaselineVS_Saline vs BaselineAS_Saline	p=1
0	3	7	67	Saline		PostVS_Saline vs PostAS_Saline	p<0.001
3	7	13	93	Saline
10	7	13	77	Saline		BaselineVS_CCK4 vs PostVS_CCK4	p<0.001
10	7	13	53	Saline		BaselineAS_CCK4 vs PostAS_CCK4	p<0.001
						BaselineVS_CCK4 vs BaselineAS_CCK4	p=1
						PostVS_CCK4 vs PostAS_CCK4	p=0.01
						BaselineVS_Saline vs BaselineVS_CCK4	p=0.536
						BaselineAS_Saline vs BaselineAS_CCK4	p=0.792
						PostVS_Saline vs PostVS_CCK4	p<0.001
						PostAS_Saline vs PostAS_CCK4	p=0.264
							n	mean	std	sem
						BaselineVS_CCK4	7	3.57143	1.51186	0.571429
						BaselineVS_Saline	7	4.57143	3.86683	1.46152
						BaselineAS_CCK4	7	4.28571	2.75162	1.04002
						BaselineAS_Saline	7	3.85714	3.18479	1.20374
						PostVS_CCK4	7	41.8571	14.7358	5.5696
						PostVS_Saline	7	10	3	1.13389
						PostAS_CCK4	7	60.1429	14.7358	5.5696
						PostAS_Saline	7	69	13.5154	5.10835

## Sheet: 6S1E
FreezingVS/AS ratio	manipulation		one-way ANOVA
1	CCK4_CCKKO
0.69	CCK4_CCKKO		df-betweenGroups	3
0.75	CCK4_CCKKO		df-withinGroups	27
0.45	CCK4_CCKKO		F	28.797
0.64	CCK4_CCKKO
0.64	CCK4_CCKKO		posthoc Bonferroni test
0.7	CCK4_CCKKO		CCK4_CCKKO vs Saline_CCKKO	p<0.001
0.11	Saline_CCKKO		CCK4_CCKKO vs L365260_C57	p<0.001
0.14	Saline_CCKKO		CCK4_CCKKO vs ACSF_C57	p=0.002
0.12	Saline_CCKKO		Saline_CCKKO vs L365260_C57	p=0.937
0.1	Saline_CCKKO		Saline_CCKKO vs ACSF_C57	p=0.019
0.14	Saline_CCKKO		L365260_C57 vs ACSF_C57	p<0.001
0.17	Saline_CCKKO
0.25	Saline_CCKKO
0	L365260_C57			n	mean	std	sem
0	L365260_C57		CCK4_CCKKO	7	0.694596	0.164957	0.0623479
0	L365260_C57		Saline_CCKKO	7	0.14704	0.0482527	0.0182378
0.14	L365260_C57		L365260_C57	8	0.0357143	0.06613	0.0233805
0	L365260_C57		ACSF_C57	9	0.387963	0.217659	0.072553
0	L365260_C57
0.14	L365260_C57
0	L365260_C57
0.6	ACSF_C57
0.13	ACSF_C57
0.29	ACSF_C57
0.25	ACSF_C57
0.14	ACSF_C57
0.25	ACSF_C57
0.6	ACSF_C57
0.67	ACSF_C57
0.57	ACSF_C57
