# Supplementary material for: Heterosynaptic plasticity of the visuo-auditory projection requires cholecystokinin released from entorhinal cortex afferents
Source: eLife journal article supplement (doi:10.7554/elife.83356), 2024-03-04

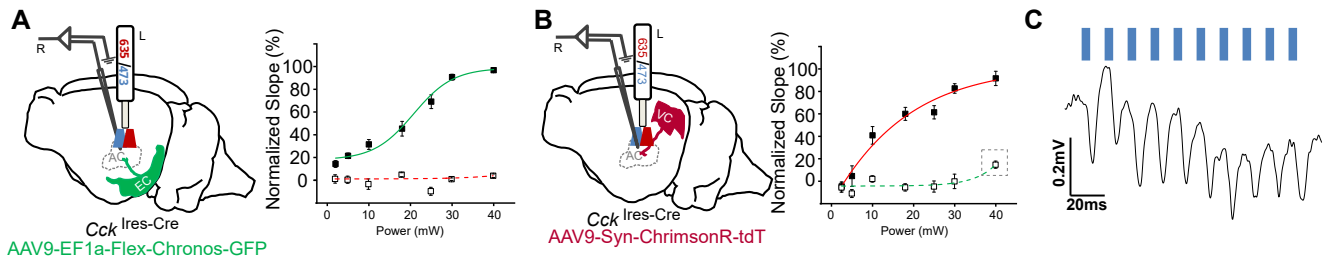

### High Intensity Noise + Pre/Post Pairing

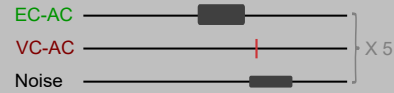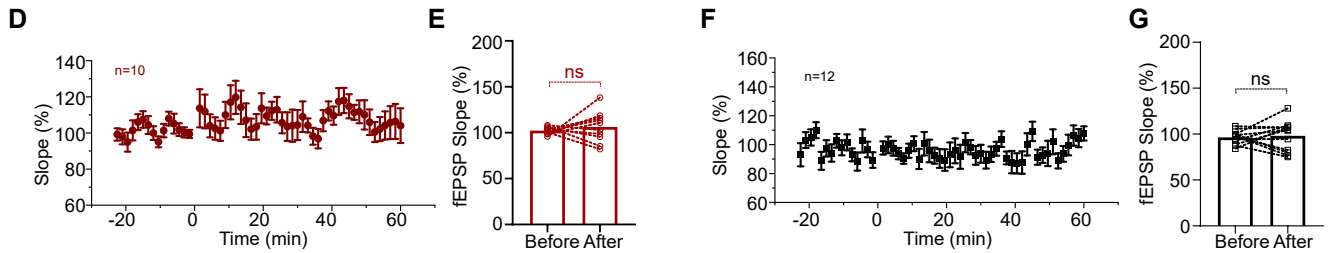

### HFS laser EC-to-AC alone

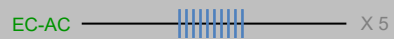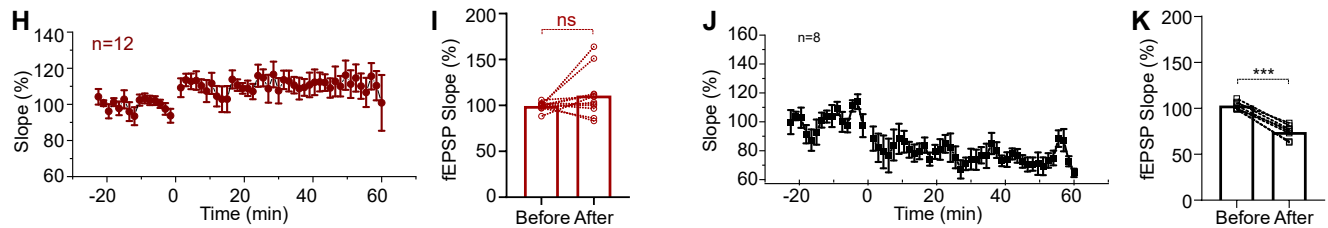

### HFS laser EC-to-AC + Pre

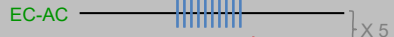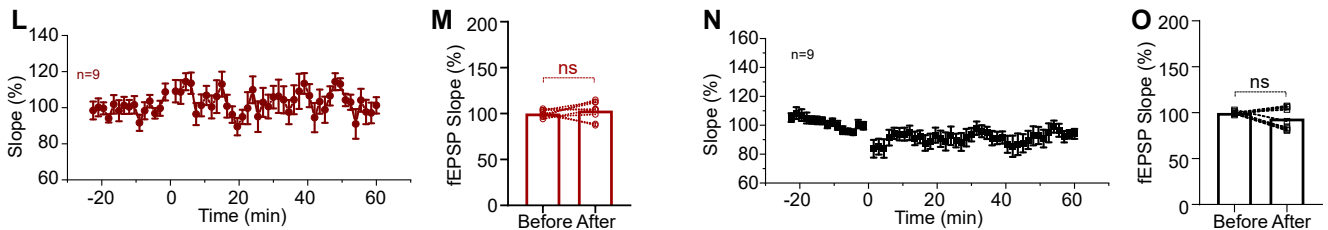

### HFS laser EC-to-AC + Post

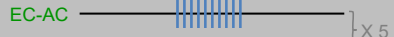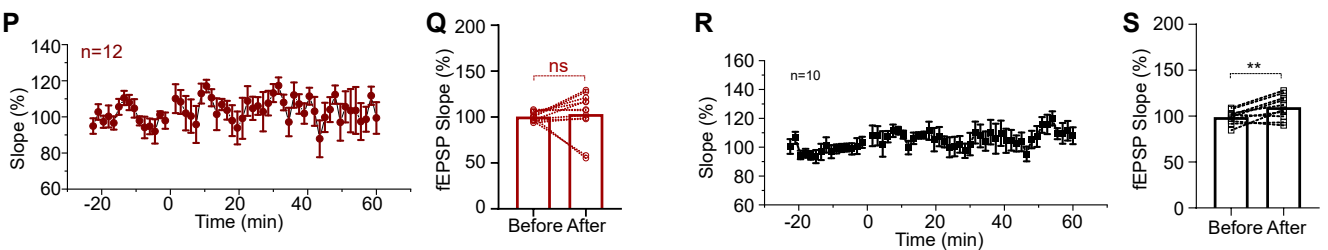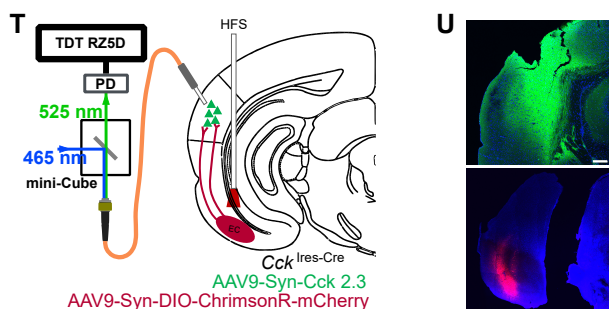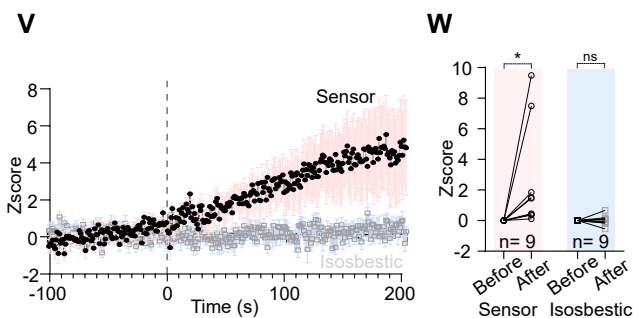

Supplement: supp [file elife-83356-supp-v1.zip]
