# Supplementary material for: Heterosynaptic plasticity of the visuo-auditory projection requires cholecystokinin released from entorhinal cortex afferents
Source: eLife. 2024 Mar 4;13:e83356. doi: 10.7554/eLife.83356 (PMC10954309; doi:10.7554/eLife.83356)
Supplement: Supplementary file 1. [file elife-83356-supp1.xlsx]

## Sheet: Sheet1
Table S1. Statistics
Figure	Panel	Statistic test	Exact P-value, F-value with degree of freedom for ANOVAs, t-value with degree of freedom for t-test, n
1	D	Paired t-test	t=0.878, df=9, p=0.403, n=10
1	G and 1-S1E	two-way RM ANOVA	Time*Manipulation F(1,27) = 25.125, p < 0.001; Adjustment: Bonferroni; CCK before vs after, p<0.0001; ACSF before vs after, p=0.411; CCK before vs ACSF before, p=0.231; CCK after vs ACSF after, p<0.0001; n=15 for ACSF group, n=14 for CCK group.
1-S1	A	two-way ANOVA	Division*Layers F (4,40) = 4.707, p = 0.0033; Division F(1, 40) = 9.768, p = 0.0033; Layeres F(4,40) = 17.18, p < 0.0001; Layer1:Primary VC vs. Layer1:Associative VC, p>0.9999; Layer2/3:Primary VC vs. Layer2/3:Associative VC, p>0.9999; Layer4:Primary VC vs. Layer4:Associative VC, p>0.9999; Layer5:Primary VC vs. Layer5:Associative VC, p = 0.0003; Layer6:Primary VC vs. Layer6:Associative VC, p>0.99…
1-S1	F-G	Paired t-test	t=0.1357, df=7, p=0.8959, n=8
1-S1	H-I	Paired t-test	t=1.347, df=9, p=0.2110, n=10
1-S1	J-K	Paired t-test	t=0.5719, df=9, p=0.5814, n=10
2	E to G	two-way RM ANOVA	Time*Manipulation F(1,21) = 10.49, p = 0.004; Adjustment: Bonferroni; HFS Laser EC to AC + Pre/Post Pairing before vs after, p<0.001; HFS Laser VC to AC + Pre/Post Pairing before vs after, p=0.623; HFS Laser EC to AC + Pre/Post Pairing before vs HFS Laser VC to AC + Pre/Post Pairing before, p=0.976; HFS Laser EC to AC + Pre/Post Pairing after vs HFS Laser VC to AC + Pre/Post Pairing after, p=0.00…
2	H to J	two-way RM ANOVA	Time*Manipulation F(1,16) = 9.711, p = 0.007; Adjustment: Bonferroni; HFS Laser EC to AC + Pre/Post Pairing before vs after, p=0.001; HFS Laser VC to AC + Pre/Post Pairing before vs after, p=0.898; HFS Laser EC to AC + Pre/Post Pairing before vs HFS Laser VC to AC + Pre/Post Pairing before, p=0.308; HFS Laser EC to AC + Pre/Post Pairing after vs HFS Laser VC to AC + Pre/Post Pairing after, p=0.00…
2	K to M	Paired t-test	t=-1.424, df=12, p=0.18, n=13
2	N to P	two-way RM ANOVA	Time*Manipulation F(1,16) = 53.29, p < 0.0001; Adjustment: Bonferroni; ACSF before vs after, p<0.0001; L-365,260 before vs after, p=0.6354; ACSF before vs L-365,260 before, p>0.9999; ACSF after vs L-365,260 after, p<0.0001; n=8 for ACSF group, n=10 for L-365,260 group.
2-S1	D-E	Paired t-test	t=0.6357,df=9, p=0.5408, n=10
2-S1	F-G	Paired t-test	t=0.3529, df=11, p=0.7308, n=12
2-S1	H-I	Paired t-test	t=1.644, df=11, p=0.1283, n=12
2-S1	J-K	Paired t-test	t=15.33, df=7, p<0.0001, n=8
2-S1	L-M	Paired t-test	t=0.8988, df=8, p=0.395, n=9
2-S1	N-O	Paired t-test	t=1.456, df=8, p=0.1836, n=9
2-S1	P-Q	Paired t-test	t=0.4089, df=11, p=0.6904, n=12
2-S1	R-S	Paired t-test	t=3.491, df=9, p=0.0068, n=10
2-S1	V-W	two-way RM ANOVA	Time*Type of signals F(1,16) = 4.876, p =0.0422; Adjustment: Bonferroni; Sensor before vs. after, p = 0.0125; Isosbestic control before vs. after, p > 0.9999. n = 9 for sensor group, n = 9 for isosbestic control.
3	G to I	two-way RM ANOVA	Time*Manipulation F(1,12) = 13.16, p =0.0035; Adjustment: Bonferroni; HFS Laser EC to AC + Pre/Post Pairing before vs after, p=0.0004; HFS laser VC to AC + Pre/Post Pairing before vs after before vs after, p>0.9999; HFS Laser EC to AC + Pre/Post Pairing before vs HFS laser VC to AC + Pre/Post Pairing before, p>0.9999; HFS Laser EC to AC + Pre/Post Pairing after vs HFS laser VC to AC + Pre/Post Pa…
3	J to L	two-way RM ANOVA	Time*Manipulation F(1,12) = 10.54, p =0.0070; Adjustment: Bonferroni; HFS Laser EC to AC + Pre/Post Pairing before vs after, p=0.0013; HFS laser VC to AC + Pre/Post Pairing before vs after before vs after, p>0.9999; HFS Laser EC to AC + Pre/Post Pairing before vs HFS laser VC to AC + Pre/Post Pairing before, p>0.9999; HFS Laser EC to AC + Pre/Post Pairing after vs HFS laser VC to AC + Pre/Post Pa…
4	E	Welch's t-test	t=7.615, df=539, p<0.0001, n = 345 for EC, n = 199 for VC
4-S1		Welch's t-test	Animal 1: t=5.315, df=78, p <0.0001, n=239 for EC, n=39 for VC; Animal 2: t=2.521, df=51, p=0.015, n=44 for EC, n=128 for VC; Animal 3: t=3.0122, df=91, p=0.003, n=62 for EC, n=32 for VC.
5	A	two-way RM ANOVA	Time*Freq F(3,34)=10.666, p<0.001; Adjustment: Bonferroni.
			1Hz before vs after	p=0.352
			10Hz before vs after	p=0.044
			40Hz before vs after	p=0.003
			80Hz before vs after	p<0.001
			1Hz before vs 10Hz before	p=1
			1Hz before vs 40Hz before	p=1
			1Hz before vs 80Hz before	p=1
			10Hz before vs 40Hz before	p=1
			10Hz before vs 80Hz before	p=1
			40Hz before vs 80Hz before	p=1
			1Hz after vs 10Hz after	p=0.447
			1Hz after vs 40Hz after	p=0.052
			1Hz after vs 80Hz after	p<0.001
			10Hz after vs 40Hz after	p=1
			10Hz after vs 80Hz after	p=0.017
			40Hz after vs 80Hz after	p=0.208
			n=9, 8, 8, 13 for 1, 10, 40, 80 Hz, respectively
5	B	two-way RM ANOVA	Time*Delay1 F(5,59)=7.115, p<0.001; Adjustment: Bonferroni.
			minus65ms before vs after	p=0.945
			10ms before vs after	p<0.001
			85ms before vs after	p<0.001
			235ms before vs after	p<0.001
			535ms before vs after	p=0.003
			885ms before vs after	p=0.385
			minus65ms before vs 10ms before	p=1
			minus65ms before vs 85ms before	p=1
			minus65ms before vs 235ms before	p=1
			minus65ms before vs 535ms before	p=1
			minus65ms before vs 885ms before	p=1
			10ms before vs 85ms before	p=1
			10ms before vs 235ms before	p=1
			10ms before vs 535ms before	p=1
			10ms before vs 885ms before	p=1
			85ms before vs 235ms before	p=1
			85ms before vs 535ms before	p=1
			85ms before vs 885ms before	p=1
			235ms before vs 535ms before	p=1
			235ms before vs 885ms before	p=1
			535ms before vs 885ms before	p=1
			minus65ms after vs 10ms after	p<0.001
			minus65ms after vs 85ms after	p=0.001
			minus65ms after vs 235ms after	p=0.043
			minus65ms after vs 535ms after	p=0.457
			minus65ms after vs 885ms after	p=1
			10ms after vs 85ms after	p=1
			10ms after vs 235ms after	p=1
			10ms after vs 535ms after	p=0.443
			10ms after vs 885ms after	p=0.004
			85ms after vs 235ms after	p=1
			85ms after vs 535ms after	p=0.978
			85ms after vs 885ms after	p=0.012
			235ms after vs 535ms after	p=1
			235ms after vs 885ms after	p=0.221
			535ms after vs 885ms after	p=1
			n=13, 13, 13, 6, 10, 10 for Delay 1=-65, 10, 85, 235, 535, and 885 ms, respectively
5	C	two-way RM ANOVA	Time*Delay2 F(5,51)=4.133, p=0.003; Adjustment: Bonferroni.
			0ms before vs after	p<0.001
			50ms before vs after	p=0.001
			200ms before vs after	p=0.006
			400ms before vs after	p=0.073
			800ms before vs after	p=0.454
			∞ before vs after	p=0.363
			0ms before vs 50ms before	p=1
			0ms before vs 200ms before	p=1
			0ms before vs 400ms before	p=1
			0ms before vs 800ms before	p=1
			0ms before vs ∞ before	p=1
			50ms before vs 200ms before	p=1
			50ms before vs 400ms before	p=1
			50ms before vs 800ms before	p=1
			50ms before vs ∞ before	p=1
			200ms before vs 400ms before	p=0.497
			200ms before vs 800ms before	p=1
			200ms before vs ∞ before	p=1
			400ms before vs 800ms before	p=1
			400ms before vs ∞ before	p=1
			800ms before vs ∞ before	p=1
			0ms after vs 50ms after	p=0.374
			0ms after vs 200ms after	p=0.374
			0ms after vs 400ms after	p=0.074
			0ms after vs 800ms after	p=0.01
			0ms after vs ∞ after	p=0.006
			50ms after vs 200ms after	p=1
			50ms after vs 400ms after	p=1
			50ms after vs 800ms after	p=1
			50ms after vs ∞ after	p=1
			200ms after vs 400ms after	p=1
			200ms after vs 800ms after	p=1
			200ms after vs ∞ after	p=1
			400ms after vs 800ms after	p=1
			400ms after vs ∞ after	p=1
			800ms after vs ∞ after	p=1
			n = 13, 11, 12, 6, 6, 9 for Delay 2= 0, 50, 200, 400, 800 ms and ∞, respectively
6	B	two-way RM ANOVA	Time*Manipulation F(5,42)=27.42, p<0.0001; Adjustment: Bonferroni.
			EC-AC_hM4Di_CNO-AS before vs after	p<0.0001
			VC-AC_hM4Di_CNO-AS before vs after	p<0.0001
			GFP_CNO-AS before vs after	p<0.0001
			EC-AC_hM4Di_CNO-VS before vs after	p=0.9998
			VC-AC_hM4Di_CNO-VS before vs after	p>0.9999
			GFP_CNO-VS before vs after	p<0.0001
6	D	two-way RM ANOVA	Time*Manipulation F(5,32)=5.586, p=0.0014; Adjustment: Bonferroni.
			EC-AC_hM4Di_CNO-AS before vs after	p=0.0014
			VC-AC_hM4Di_CNO-AS before vs after	p<0.0001
			GFP_CNO-AS before vs after	p<0.0001
			EC-AC_hM4Di_CNO-VS before vs after	p>0.9999
			VC-AC_hM4Di_CNO-VS before vs after	p=0.9986
			GFP_CNO-VS before vs after	p=0.0015
6-S1	B	two-way RM ANOVA	Time*Manipulation F(3,45)=6.588, p=0.001; Adjustment: Bonferroni.
			BaselineVS_ACSF vs PostVS_ACSF	p<0.001
			BaselineAS_ACSF vs PostAS_ACSF	p<0.001
			BaselineVS_ACSF vs BaselineAS_ACSF	p=1
			PostVS_ACSF vs PostAS_ACSF	p<0.001
			BaselineVS_L365260 vs PostVS_L365260	p=1
			BaselineAS_L365260 vs PostAS_L365260	p<0.001
			BaselineVS_L365260 vs BaselineAS_L365260	p=1
			PostVS_L365260 vs PostAS_L365260	p<0.001
			BaselineVS_ACSF vs BaselineVS_L365260	p=0.899
			BaselineAS_ACSF vs BaselineAS_L365260	p=0.678
			PostVS_ACSF vs PostVS_L365260	p<0.001
			PostAS_ACSF vs PostAS_L365260	p=0.962
			n=9 for ACSF group, n=8 for L360265 group
6-S1	D	two-way RM ANOVA	Time*Manipulation F(3,36)=17.631,, p<0.001; Adjustment: Bonferroni.
			BaselineVS_Saline vs PostVS_Saline	p=1
			BaselineAS_Saline vs PostAS_Saline	p<0.001
			BaselineVS_Saline vs BaselineAS_Saline	p=1
			PostVS_Saline vs PostAS_Saline	p<0.001
			BaselineVS_CCK4 vs PostVS_CCK4	p<0.001
			BaselineAS_CCK4 vs PostAS_CCK4	p<0.001
			BaselineVS_CCK4 vs BaselineAS_CCK4	p=1
			PostVS_CCK4 vs PostAS_CCK4	p=0.01
			BaselineVS_Saline vs BaselineVS_CCK4	p=0.536
			BaselineAS_Saline vs BaselineAS_CCK4	p=0.792
			PostVS_Saline vs PostVS_CCK4	p<0.001
			PostAS_Saline vs PostAS_CCK4	p=0.264
			n=7 for CCK group, n=7 for Saline group
6-S1	E	one-way ANOVA	F(3,27)=28.797; posthoc Bonferroni test.
			CCK4_CCKKO vs Saline_CCKKO	p<0.001
			CCK4_CCKKO vs L365260_C57	p<0.001
			CCK4_CCKKO vs ACSF_C57	p=0.002
			Saline_CCKKO vs L365260_C57	p=0.937
			Saline_CCKKO vs ACSF_C57	p=0.019
			L365260_C57 vs ACSF_C57	p<0.001
			n=7, 7, 8, 9 for CCK4_CCKKO, Saline_CCKKO, L365260_C57, and ACSF_C57, respectively
