# Supplementary figures and images for: Heterosynaptic plasticity of the visuo-auditory projection requires cholecystokinin released from entorhinal cortex afferents
Source: eLife journal article supplement (doi:10.7554/elife.83356), 2024-03-04

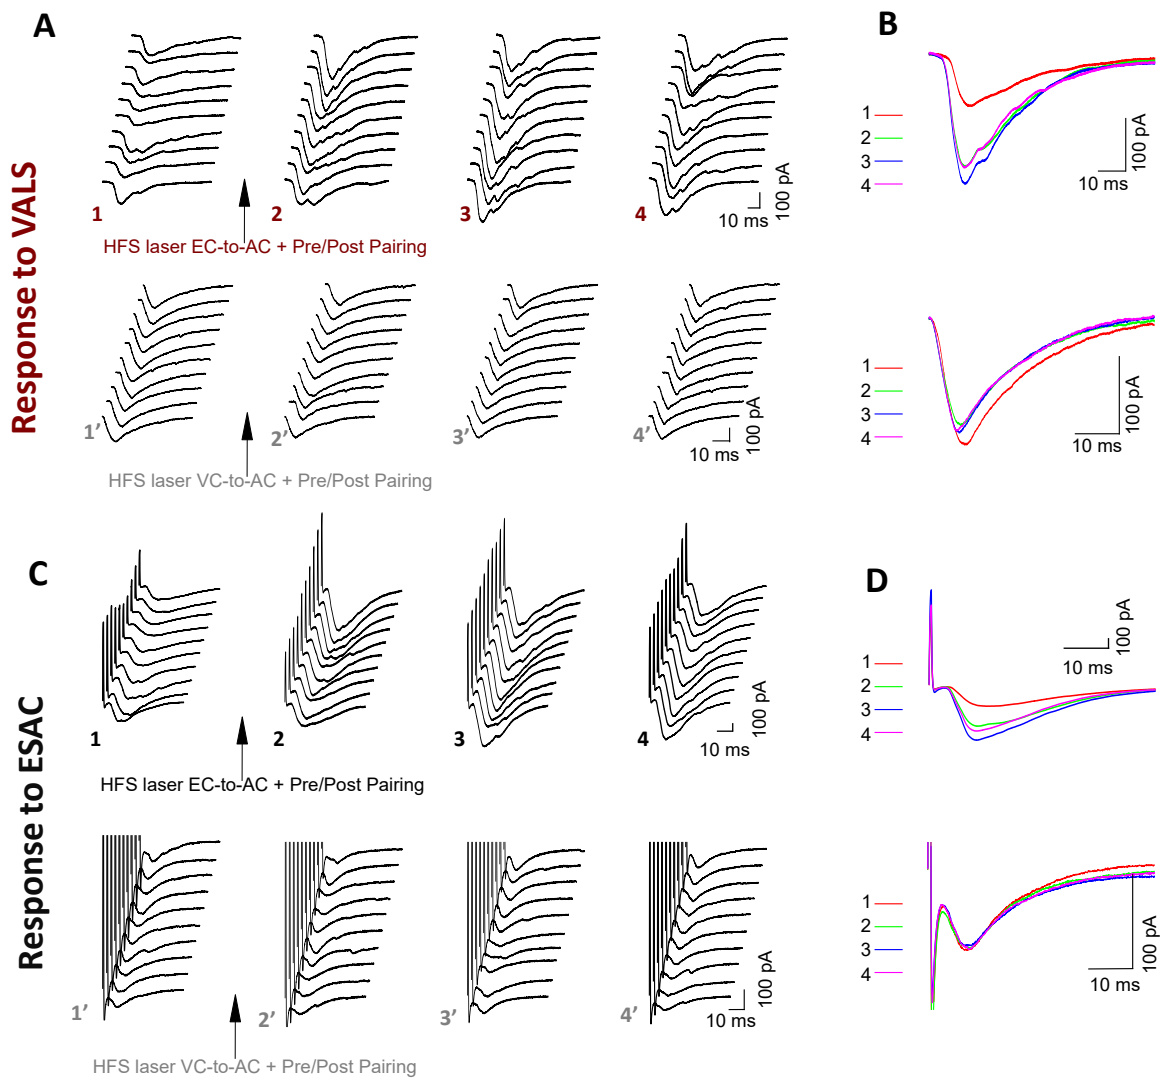

Supplement: supp [file elife-83356-supp-v1.zip]

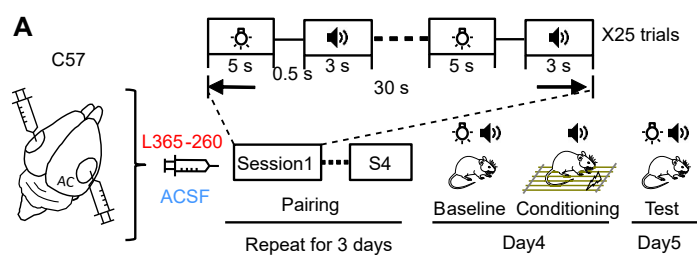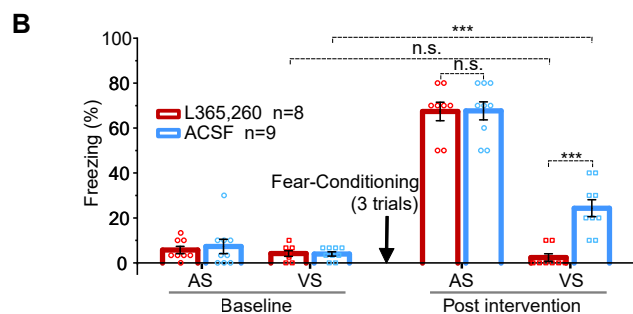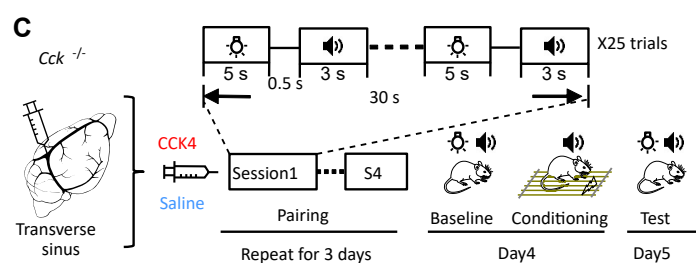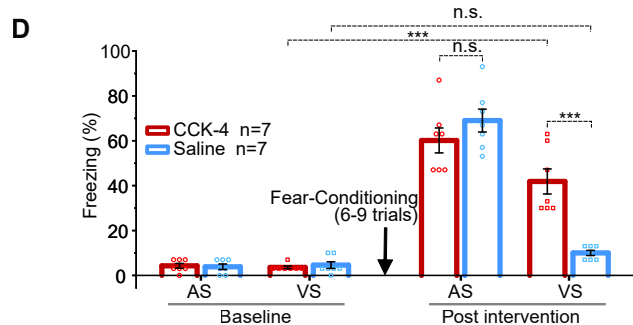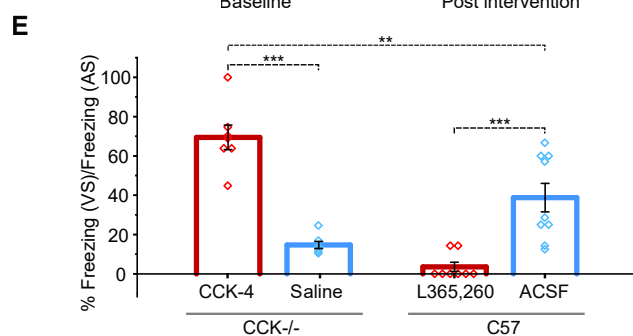

Supplement: supp [file elife-83356-supp-v1.zip]

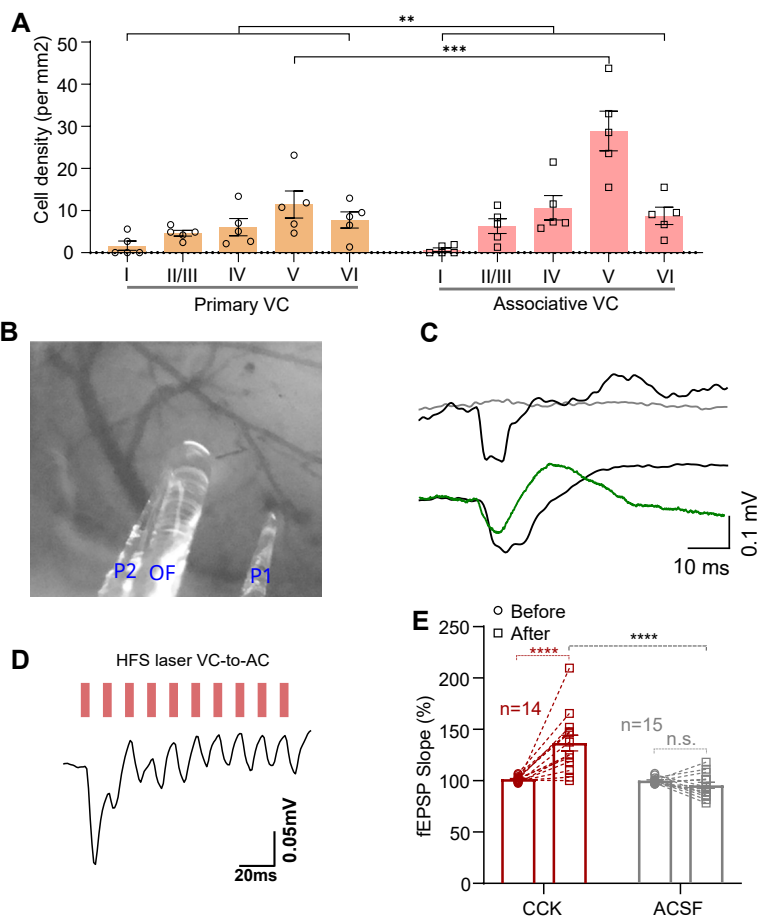

CCK alone

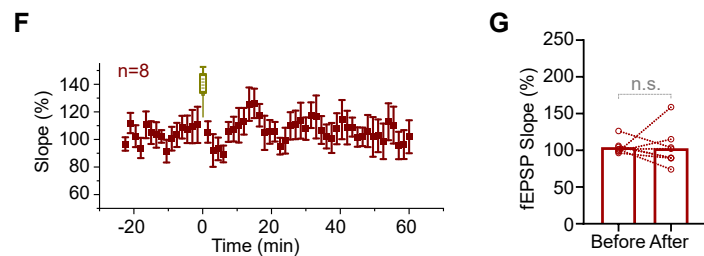

CCK + Pre

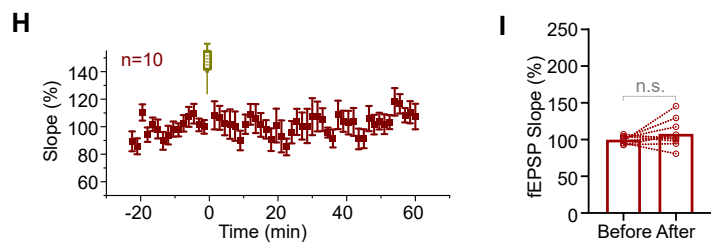

CCK + Post

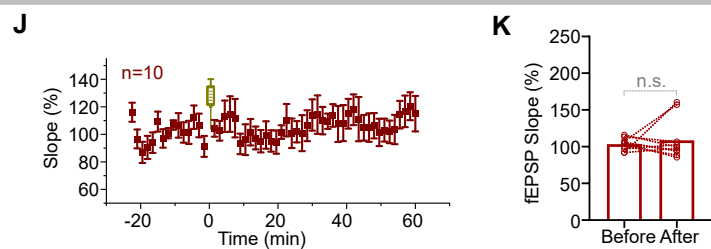

Supplement: supp [file elife-83356-supp-v1.zip]

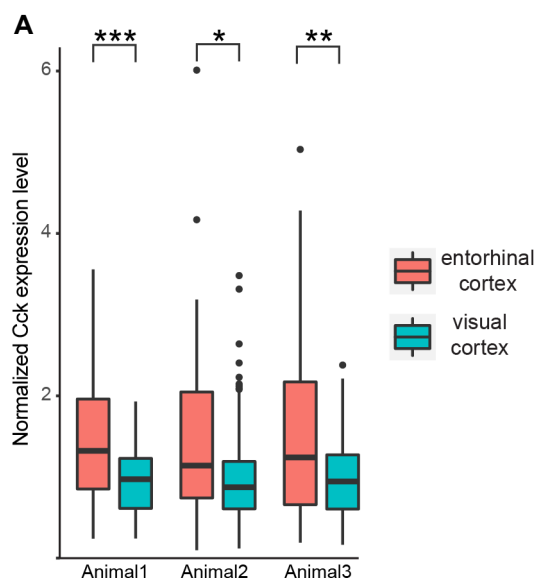

Supplement: supp [file elife-83356-supp-v1.zip]
